# Supplementary material for: Single-cell N6-methyladenosine regulator patterns guide intercellular communication of tumor microenvironment that contribute to colorectal cancer progression and immunotherapy
Source: Springer Nature journal article supplement (doi:10.1186/s12967-022-03395-7), 2022-05-04
Supplement: MOESM1 [file 20371360]

| <b>Description</b>                                                                                                              |
|---------------------------------------------------------------------------------------------------------------------------------|
| <b>TableS1</b> The information of including cohorts in the study.                                                               |
| <b>TableS2</b> The geneset lists using in the study                                                                             |
| <b>TableS3:</b> the list of methylation-related genes in each NMF sub cluster of CRC                                            |
| <b>TableS4:</b> Complex intercellular communication networks between the m6A-mediated immune cells clusters and epithelia cells |
| <b>TableS5:</b> REAC analysis for Each m6A-mediated subClusters                                                                 |
| <b>TableS6:</b> OS of m6A-related Cell types In the Bulk sequences                                                              |
| <b>TableS7:</b> RFS of m6A-related Cell types In the Bulk sequences                                                             |
| <b>TableS8:</b> m6A-related Cell type signatures to response of ICB immunotherapy in the Bulk sequences                         |

| TableS1 The information of including cohorts in the study. |              |               |                      |                                                                                     |
|------------------------------------------------------------|--------------|---------------|----------------------|-------------------------------------------------------------------------------------|
| No.                                                        | Cohort Names | Samples/cells | Prognostic data type | Source Website                                                                      |
| 1                                                          | GSE132465    | 65362         | none                 | <a href="https://www.ncbi.nlm.nih.gov/geo/">https://www.ncbi.nlm.nih.gov/geo/</a>   |
| 2                                                          | GSE17538     | 238           | RFS,OS               | <a href="https://www.ncbi.nlm.nih.gov/geo/">https://www.ncbi.nlm.nih.gov/geo/</a>   |
| 3                                                          | GSE33113     | 96            | OS                   | <a href="https://www.ncbi.nlm.nih.gov/geo/">https://www.ncbi.nlm.nih.gov/geo/</a>   |
| 4                                                          | GSE37892     | 130           | RFS                  | <a href="https://www.ncbi.nlm.nih.gov/geo/">https://www.ncbi.nlm.nih.gov/geo/</a>   |
| 5                                                          | GSE38832     | 122           | RFS,OS               | <a href="https://www.ncbi.nlm.nih.gov/geo/">https://www.ncbi.nlm.nih.gov/geo/</a>   |
| 6                                                          | GSE39582     | 585           | RFS,OS               | <a href="https://www.ncbi.nlm.nih.gov/geo/">https://www.ncbi.nlm.nih.gov/geo/</a>   |
| 7                                                          | GSE41258     | 182           | OS                   | <a href="https://www.ncbi.nlm.nih.gov/geo/">https://www.ncbi.nlm.nih.gov/geo/</a>   |
| 8                                                          | GSE39084     | 71            | RFS,OS               | <a href="https://www.ncbi.nlm.nih.gov/geo/">https://www.ncbi.nlm.nih.gov/geo/</a>   |
| 9                                                          | GSE14333     | 251           | RFS,OS               | <a href="https://www.ncbi.nlm.nih.gov/geo/">https://www.ncbi.nlm.nih.gov/geo/</a>   |
| 10                                                         | GSE72970     | 124           | RFS,OS               | <a href="https://www.ncbi.nlm.nih.gov/geo/">https://www.ncbi.nlm.nih.gov/geo/</a>   |
| 11                                                         | GSE103479    | 156           | RFS,OS               | <a href="https://www.ncbi.nlm.nih.gov/geo/">https://www.ncbi.nlm.nih.gov/geo/</a>   |
| 12                                                         | TCGA-COAD    | 539           | RFS,OS               | <a href="https://xenabrowser.net/datapages/">https://xenabrowser.net/datapages/</a> |
| 13                                                         | TCGA-READ    | 159           | RFS,OS               | <a href="https://xenabrowser.net/datapages/">https://xenabrowser.net/datapages/</a> |

## TableS2 The Geneset lists using in the study

| Gene Set names                       | Types                    | Genes    |          |           |           |          |           |          |
|--------------------------------------|--------------------------|----------|----------|-----------|-----------|----------|-----------|----------|
| <b>m6Agenes</b>                      | <b>Erasers</b>           | CBL1     | KIAA1429 | METTL14   | METTL3    | RBM15    | RBM15B    | WTAP     |
|                                      | <b>Readers</b>           | ZC3H13   | ELAVL1   | FMR1      | HNRNPA2B1 | HNRNPC   | IGF2BP1   | IGF2BP2  |
|                                      |                          | IGF2BP3  | LRPPRC   | YTHDC1    | YTHDC2    | YTHDF1   | YTHDF2    | YTHDF3   |
|                                      | <b>Writers</b>           | ALKBH5   | FTO      |           |           |          |           |          |
| <b>CCR_CAF_genes</b>                 | <b>pan-myCAF</b>         | ADIRF    | ACTA2    | MYH11     | TAGLN     | SPARCL1  | MCAM      | A2M      |
|                                      |                          | PPP1R14A | CRIP2    | ADAMTS1   | CSR2      | NDUFA4L2 | TPM1      | MAP1B    |
|                                      |                          | RGS5     | MEF2C    | CALM2     | APOLD1    | OAZ2     | MGST3     | ISYNA1   |
|                                      |                          | NDRG2    | ID3      | RGS16     | CYB5R3    | CRYAB    | OLFML2A   | TIMP3    |
|                                      |                          | MYLK     | IGFBP7   | CRIP1     | TINAGL1   | TPM2     | PTP4A3    | CPE      |
|                                      |                          | FRZB     | PRKCDBP  | CSR1      | CAV1      | ADAMTS4  | GJA4      |          |
|                                      |                          | CPM      | PGF      | GUCY1B3   | UBA2      | YIF1A    | PHLDA1    |          |
|                                      |                          | GUCY1A3  | FILIP1   | FAM13C    | NDUFS4    | ITGB1    | KCNE4     |          |
|                                      | <b>pan-dCAF</b>          | COL1A1   | THBS2    | CTHRC1    | COL3A1    | LUM      | COL1A2    | LGALS1   |
|                                      |                          | COL12A1  | MMP2     | INHBA     | TNFAIP6   | VCAN     | ADAM12    | THY1     |
|                                      |                          | EMP1     | ANGPTL2  | RARRES2   | SULF1     | IGFBP3   | COL8A1    | GREM1    |
|                                      |                          | P4HA3    | CRABP2   | TPM4      | LOXL1     | CPXM1    | COL6A1    | ASPN     |
|                                      |                          | YIF1A    | SNAI2    | C1S       | TMEM176B  | CTGF     | MORF4L2   | UAP1     |
|                                      |                          | LMNA     | CYP1B1   | MGP       | ANGPTL4   | TIMP1    | SERPINF1  | ITGB1    |
|                                      |                          | COL5A1   | POSTN    | SERPINE1  | LOXL2     | COL11A1  | CTSK      | TGFBI    |
|                                      |                          | FN1      | STEAP1   | SPON2     | PLAUR     | SPHK1    | LOX       | HTRA3    |
|                                      |                          | DCN      | ITGA5    | ANTXR1    | RIN2      | TMEM119  | TNFRSF12A | C1R      |
|                                      |                          | PDLIM4   | ITGA11   | PRSS23    | COL6A2    | SFRP2    | PLAU      |          |
|                                      | <b>pan-iCAF</b>          | CFD      | GPC3     | C3        | ADH1B     | IGF1     | EFEMP1    | PODN     |
|                                      |                          | PLA2G2A  | DPT      | WISP2     | CCDC80    | SFRP2    | PTGDS     | DCN      |
|                                      |                          | FHL2     | ELN      | KLF4      | TMEM176B  | SERPINF1 | FHL1      | GPX3     |
|                                      |                          | RARRES1  | CYR61    | IGFBP5    | FBLN1     | MGST1    | MFAP4     | CTGF     |
|                                      |                          | SEPP1    | CXCL12   | ABI3BP    | GSN       | TMEM176A | FIBIN     | C1R      |
|                                      |                          | MGP      | C1S      | IGFBP6    | CYP1B1    | CST3     | SLC40A1   | SFRP4    |
|                                      | <b>pan-pCAF</b>          | NUSAP1   | DIAPH3   | LOXL2     | ADAM12    | LOX      | POSTN     | THY1     |
|                                      |                          | COL1A1   | COL8A1   | COL6A1    | COL6A2    | CD248    | FN1       | COL12A1  |
|                                      |                          | CTHRC1   | COL5A1   | LOXL1     |           |          |           |          |
|                                      | <b>pan-iCAF-2</b>        | IER3     | CXCL2    | ICAM1     | TNFAIP2   | NFKBIA   | NR4A1     | CCL2     |
|                                      |                          | GEM      | NR4A3    | APOD      | SAT1      | UAP1     | OGN       | GFPT2    |
|                                      |                          | ABI3BP   | GADD45B  | DUSP1     | RARRES1   | CST3     | ABL2      | EGR1     |
|                                      |                          | SOD2     | FOSB     | PIM1      | ZFP36     | CLU      | C3        | CYP1B1   |
|                                      |                          | JUNB     | THBS1    | CDKN1A    |           |          |           |          |
| <b>Fibroblasts_cell_marker_genes</b> | <b>Surface_markers</b>   | PARM1    | APOC3    | CSPG4     | CD36      | SUSD2    | SDC1      | TREM1    |
|                                      |                          | LRRN3    | THY1     | BAMBI     | P2RY6     | CD34     | PI16      | EBP      |
|                                      |                          | GPC3     | RAMP2    | CLDN1     | ICAM1     | MUSK     | CXCR4     | NCAM1    |
|                                      |                          | EFNB1    |          |           |           |          |           |          |
| <b>T_cell_marker_genes</b>           | <b>Co-inhibitors</b>     | ADORA2A  | BTLA     | BTN2A2    | BTN3A1    | BTN3A2   | BTNL2     | C10orf54 |
|                                      |                          | CSF1R    | HAVCR2   | IDO1      | IL10      | IL10RB   | KDR       | KIR2DL1  |
|                                      |                          | SLAMF7   | TGFB1    | TIGIT     | VRCN1     | VTCN1    | CD247     | CTLA4    |
|                                      |                          | CD160    | CD244    | CD274     | CD276     | CD48     | CD96      |          |
|                                      |                          | KIR2DL2  | KIR2DL3  | LAG3      | LAIR1     | LGALS9   | PVRL2     |          |
|                                      |                          | PDCD1    | PDCD1LG2 |           |           |          |           |          |
|                                      | <b>Co-stimulations</b>   | BTNL8    | CD226    | CD27      | CD28      | CD40     | CD58      | CD70     |
|                                      |                          | SLAMF1   | TMIGD2   | TNFRSF13B | TNFRSF13C | TNFRSF14 | TNFRSF4   | TNFRSF8  |
|                                      |                          | TNFSF8   | TNFSF9   | ENTPD1    | NT5E      | ICOS     | TNFSF4    | TNFSF15  |
|                                      |                          | CD80     | CD86     | EGFR      | HAVCR1    | TNFSF18  | ICOSLG    | TNFSF13B |
|                                      |                          | TNFRSF9  | TNFSF13  |           |           |          |           |          |
|                                      | <b>T-function Genes</b>  | CD3E     | CD4      | CD8B      | FOXP3     | GZMB     | PRF1      | TBX21    |
|                                      |                          | IL2RA    | IKZF2    |           |           |          |           |          |
|                                      | <b>Immune_Checkpoint</b> | CD274    | CTLA4    | LAG3      | TIM3      | TNFRSF9  | TIGIT     | CD226    |
|                                      |                          | CD7      | GZMB     | PRF1      | TNFRSF18  | TNFRSF4  | HAVCR2    | NLG1     |

|                                            |                        |       |          |          |          |         |          |         |        |
|--------------------------------------------|------------------------|-------|----------|----------|----------|---------|----------|---------|--------|
|                                            | s                      | CD4   | CD8A     | CD8B     | FOXP3    | IL2     | CXCL8    | PDCD1   |        |
|                                            |                        | IFNG  |          |          |          |         |          |         |        |
| <i>T_Function<br/>_score_gene<br/>list</i> | <b>Teffectscore</b>    | CD8A  | CXCL10   | CXCL9    | GZMA     | GZMB    | IFNG     | PRF1    |        |
|                                            |                        | TBX21 |          |          |          |         |          |         |        |
|                                            | <b>Cytotoxicscore</b>  | CST7  | GZMA     | GZMB     | IFNG     | NKG7    | PRF1     |         |        |
|                                            | <b>Exhaustionscore</b> | CTLA4 | HAVCR2   | LAG3     | PDCD1    | TIGIT   |          |         |        |
|                                            | <b>Tevasionscore</b>   |       | B2M      | IFNGR1   | JAK2     | SOCS1   | TAP1     | TAP2    | TAPBP  |
|                                            |                        |       | AGO2     | AHSA1    | ANAPC15  | ARF6    | ATG14    | ATG7    | ATG9A  |
|                                            |                        |       | PDCD6IP  | PDSS2    | PI4KB    | PIGK    | PIGT     | PKN2    | PPP1CA |
|                                            |                        |       | PDIA3    | PIGS     | PIGU     | PPP2R2A | PSMB8    | RB1CC1  | RBM15  |
|                                            |                        |       | IFNAR1   | IFNAR2   | IKBKB    | INO80   | IPPK     | IRF9    | JAGN1  |
|                                            |                        |       | GPI1     | IFNGR2   | IKBKG    | IRF1    | JAK1     | OTUD5   | PTPN2  |
|                                            |                        |       | BRPF1    | CAD      | CALR     | CEP55   | CHMP5    | COX6C   | CREBBP |
|                                            |                        |       | RCE1     | RGP1     | RIC1     | S100PBP | SARNP    | SETD1A  | SETDB1 |
|                                            |                        |       | TMEM127  | TNFRSF1B | UBE2G2   | UBE2N   | VDAC2    | VPS29   | VPS35  |
|                                            |                        |       | MED16    | MED23    | MED24    | MGAT1   | MTA2     | N6AMT1  | NCBP1  |
|                                            |                        |       | ATG12    | ATG3     | ATG5     | BECN1   | CHIC2    | DNTTIP1 | EMC8   |
|                                            |                        |       | DPH5     | EIF3H    | EMC2     | EMC3    | EMC4     | EMC6    | F8A    |
|                                            |                        |       | TBK1     | TFRC     | TGFBR2   | TMEM208 | TRADD    | TRPM7   | UBR5   |
|                                            |                        |       | MAP3K7   | MEN1     | MOGS     | NDUFA13 | NXT1     | OTULIN  | H2-K1  |
|                                            |                        |       | VPS16    | WDR7     | WDR83    | WWP2    | YAP1     | ZC3H3   | ACTB   |
|                                            |                        |       | ADAR     | ATG10    | ATG101   | CFLAR   | FITM2    | GPAA1   | PCED1B |
|                                            |                        |       | ATP13A1  | ATXN7L3  | BC003331 | BCL2L1  | BOLA3    | BRAT1   | IST1   |
|                                            |                        |       | PPP1R8   | PPP2R3C  | PRKCSH   | PSMB9   | PSMG1    | PTAR1   | GLS    |
|                                            |                        |       | RIC8     | RNF31    | SCAF4    | SMG7    | TAB1     | TAB2    | VPS13A |
|                                            |                        |       | JMJD6    | KAT6A    | KLF16    | KMT2A   | LIPT2    | MAPK1   | HSPA13 |
|                                            |                        |       | RBCK1    | STAT1    | STAT2    | TNFAIP3 | TNFRSF1A | TRAF2   | ACAD9  |
|                                            |                        |       | CUL3     | DCP1A    | DET1     | DICER1  | DNAJC13  | DOT1L   | PCBP2  |
|                                            |                        |       | SLC25A32 | SPCS1    | SRRT     | SRSF7   | STOML2   | SUSD6   | HDAC1  |
|                                            |                        |       | VPS4B    | WIPI2    | ZCCHC14  | FAM58B  | FAS      | FNTB    | GALE   |
|                                            |                        |       | NDUFAF6  | NPLOC4   | NUP188   | UFC1    | UFL1     | USP7    | UXS1   |
|                                            |                        |       | ERAP1    | ERP44    | FADD     | HCFC2   | HDGFRP2  | HEXIM1  | HIRA   |

## The list of methylation-related genes in each NMF sub cluster

| Methylation-celltype | Methylation-related gene | Methylation-celltype | Methylation-related gene | Methylation-celltype | Methylation-related gene |
|----------------------|--------------------------|----------------------|--------------------------|----------------------|--------------------------|
| Fibroblast_C1        | HNRNPA2B1                | macrophage_C1        | WTAP                     | CD8+ T cells_C1      | HNRNPA2B1                |
| Fibroblast_C1        | TUBA1B                   | macrophage_C1        | SOD2                     | CD8+ T cells_C1      | ACTB                     |
| Fibroblast_C1        | TAGLN                    | macrophage_C1        | FTH1                     | CD8+ T cells_C1      | STMN1                    |
| Fibroblast_C1        | STMN1                    | macrophage_C1        | BTG1                     | CD8+ T cells_C1      | HMGB2                    |
| Fibroblast_C1        | HSP90AA1                 | macrophage_C1        | BCL2A1                   | CD8+ T cells_C1      | CTSD                     |
| Fibroblast_C1        | HSPA1A                   | macrophage_C1        | CD44                     | CD8+ T cells_C1      | TPI1                     |
| Fibroblast_C1        | ACTN4                    | macrophage_C1        | EREG                     | CD8+ T cells_C1      | TUBB                     |
| Fibroblast_C1        | HSPA1B                   | macrophage_C1        | C15orf48                 | CD8+ T cells_C1      | RANBP1                   |
| Fibroblast_C1        | CYR61                    | macrophage_C1        | IL1B                     | CD8+ T cells_C1      | PSME2                    |
| Fibroblast_C1        | CD74                     | macrophage_C1        | NINJ1                    | CD8+ T cells_C1      | CORO1A                   |
| Fibroblast_C1        | ACTA2                    | macrophage_C1        | IL1RN                    | CD8+ T cells_C1      | ANXA6                    |
| Fibroblast_C1        | POSTN                    | macrophage_C1        | GOS2                     | CD8+ T cells_C1      | HMGN2                    |
| Fibroblast_C2        | WTAP                     | macrophage_C1        | PNRC1                    | CD8+ T cells_C1      | HSP90AA1                 |
| Fibroblast_C2        | SOD2                     | macrophage_C1        | AQP9                     | CD8+ T cells_C1      | PTTG1                    |
| Fibroblast_C2        | C11orf96                 | macrophage_C1        | NAMPT                    | CD8+ T cells_C1      | DUT                      |
| Fibroblast_C2        | FTH1                     | macrophage_C1        | SERPINB9                 | CD8+ T cells_C1      | ENO1                     |
| Fibroblast_C2        | TNFAIP3                  | macrophage_C1        | SRGN                     | CD8+ T cells_C1      | PCNA                     |
| Fibroblast_C2        | CXCL2                    | macrophage_C1        | EIF1                     | CD8+ T cells_C1      | PGAM1                    |
| Fibroblast_C2        | B4GALT1                  | macrophage_C1        | ATP2B1                   | CD8+ T cells_C1      | PKM                      |
| Fibroblast_C2        | NFATC2                   | macrophage_C1        | NFKB1                    | CD8+ T cells_C1      | HLA-DRB1                 |
| Fibroblast_C2        | SAT1                     | macrophage_C1        | TIMP1                    | CD8+ T cells_C1      | HNRNPA3                  |
| Fibroblast_C2        | SERPINE1                 | macrophage_C1        | TNIP3                    | CD8+ T cells_C1      | PSMB9                    |
| Fibroblast_C2        | PIM3                     | macrophage_C1        | CCL3                     | CD8+ T cells_C1      | CXCL13                   |
| Fibroblast_C2        | LIF                      | macrophage_C1        | PLAUR                    | CD8+ T cells_C1      | XRCC5                    |
| Fibroblast_C2        | HNRNPH1                  | macrophage_C1        | CCL20                    | CD8+ T cells_C1      | CD53                     |
| Fibroblast_C2        | NAMPT                    | macrophage_C1        | SAT1                     | CD8+ T cells_C1      | PDIA6                    |
| Fibroblast_C2        | TNFAIP2                  | macrophage_C1        | CXCL2                    | CD8+ T cells_C1      | ACTG1                    |
| Fibroblast_C2        | CXCL8                    | macrophage_C1        | PTGS2                    | CD8+ T cells_C1      | RPA3                     |
| Fibroblast_C2        | KDM6B                    | macrophage_C1        | TNFAIP6                  | CD8+ T cells_C1      | ECH1                     |
| Fibroblast_C2        | HMGA1                    | macrophage_C1        | EHD1                     | CD8+ T cells_C1      | HMGB1                    |
| Fibroblast_C2        | FTL                      | macrophage_C1        | MIR3945HG                | CD8+ T cells_C1      | RBPJ                     |
| Fibroblast_C2        | IER3                     | macrophage_C1        | NFKBIA                   | CD8+ T cells_C1      | COX8A                    |
| Fibroblast_C2        | IL6                      | macrophage_C1        | IL1A                     | CD8+ T cells_C1      | IDH2                     |
| Fibroblast_C2        | CDC42SE1                 | macrophage_C1        | KYNU                     | CD8+ T cells_C1      | POLR2G                   |
| Fibroblast_C2        | CXCL3                    | macrophage_C1        | TNIP1                    | CD8+ T cells_C1      | PTBP1                    |
| Fibroblast_C2        | PTPRS                    | macrophage_C1        | CCL3L3                   | CD8+ T cells_C1      | PSMA4                    |
| Fibroblast_C2        | IL1R1                    | macrophage_C1        | CFLAR                    | CD8+ T cells_C2      | HNRNPC                   |
| Fibroblast_C2        | NFKBIA                   | macrophage_C1        | LINC00936                | CD8+ T cells_C3      | WTAP                     |
| Fibroblast_C2        | CHI3L1                   | macrophage_C1        | CCL4                     | CD8+ T cells_C4      | ALKBH5                   |
| Fibroblast_C2        | GPRC5A                   | macrophage_C1        | THBS1                    | CD8+ T cells_C4      | YTHDF2                   |
| Fibroblast_C2        | NEAT1                    | macrophage_C1        | CCRL2                    | CD8+ T cells_C4      | YTHDC1                   |
| Fibroblast_C2        | ADAM17                   | macrophage_C1        | TNFAIP8                  | CD8+ T cells_C4      | ZFP36                    |
| Fibroblast_C2        | PNRC1                    | macrophage_C1        | CD300E                   | CD8+ T cells_C4      | ZC3H13                   |
| Fibroblast_C2        | BTG1                     | macrophage_C1        | THAP2                    | CD4+ T cells_C1      | HNRNPA2B1                |
| Fibroblast_C2        | MT2A                     | macrophage_C1        | ATP13A3                  | CD4+ T cells_C2      | HNRNPC                   |
| Fibroblast_C2        | ICAM1                    | macrophage_C1        | S100A12                  | CD4+ T cells_C3      | WTAP                     |
| Fibroblast_C2        | TSC22D1                  | macrophage_C1        | SAMSN1                   | CD4+ T cells_C4      | YTHDF2                   |
| Fibroblast_C2        | RPL3                     | macrophage_C1        | SLC25A37                 | CD4+ T cells_C4      | ALKBH5                   |
| Fibroblast_C2        | RPL7                     | macrophage_C1        | CTNNB1                   | CD4+ T cells_C4      | YTHDC1                   |
| Fibroblast_C2        | RNF19B                   | macrophage_C1        | CXCL3                    | CD4+ T cells_C4      | ZC3H13                   |
| Fibroblast_C2        | CDKN1A                   | macrophage_C1        | ANXA5                    | Regulatory T cell    | HNRNPA2B1                |
| Fibroblast_C2        | NFKBIZ                   | macrophage_C1        | GK                       | Regulatory T cell    | CD53                     |
| Fibroblast_C2        | MCL1                     | macrophage_C1        | NLRP3                    | Regulatory T cell    | HSP90AA1                 |

|               |          |               |          |                   |           |
|---------------|----------|---------------|----------|-------------------|-----------|
| Fibroblast_C2 | PTGDS    | macrophage_C1 | ACSL1    | Regulatory T cell | HSP90AB1  |
| Fibroblast_C2 | EEF2     | macrophage_C1 | B4GALT1  | Regulatory T cell | HNRNPC    |
| Fibroblast_C2 | CD44     | macrophage_C1 | DENND5A  | Regulatory T cell | WTAP      |
| Fibroblast_C2 | ERRFI1   | macrophage_C1 | VCAN     | Regulatory T cell | YTHDF2    |
| Fibroblast_C2 | SLC39A14 | macrophage_C1 | BASP1    | Regulatory T cell | YTHDC1    |
| Fibroblast_C2 | NFKB1    | macrophage_C1 | CREM     | Regulatory T cell | ALKBH5    |
| Fibroblast_C2 | ABL2     | macrophage_C1 | INHBA    | Regulatory T cell | ZC3H13    |
| Fibroblast_C2 | TFPI2    | macrophage_C1 | DRAM1    | Regulatory T cell | ELAVL1    |
| Fibroblast_C2 | GEM      | macrophage_C1 | CD55     | Regulatory T cell | MALAT1    |
| Fibroblast_C2 | KLF6     | macrophage_C1 | PHLDA1   | NK cells_C1       | HNRNPA2B1 |
| Fibroblast_C2 | PTGS2    | macrophage_C1 | TNFRSF1B | NK cells_C2       | HNRNPC    |
| Fibroblast_C2 | LHFPL2   | macrophage_C1 | VIM      | NK cells_C3       | WTAP      |
| Fibroblast_C2 | CCDC71L  | macrophage_C1 | MAP3K8   | NK cells_C4       | ALKBH5    |
| Fibroblast_C2 | SET      | macrophage_C1 | FCN1     | NK cells_C4       | YTHDF1    |
| Fibroblast_C2 | RYBP     | macrophage_C1 | TRAF1    |                   |           |
| Fibroblast_C2 | ATP13A3  | macrophage_C1 | EIF1B    |                   |           |
| Fibroblast_C2 | GFPT2    | macrophage_C1 | OLR1     |                   |           |

|               |          |               |           | <b>Methylation-<br/>celltype</b> | <b>Methylatio<br/>n_related<br/>gene</b> |
|---------------|----------|---------------|-----------|----------------------------------|------------------------------------------|
| Fibroblast_C2 | CTNNB1   | macrophage_C1 | SLC7A5    |                                  |                                          |
| Fibroblast_C2 | PLK3     | macrophage_C1 | GCH1      | B cells_C1                       | HNRNPA2B1                                |
| Fibroblast_C2 | BMP2     | macrophage_C1 | DUSP4     | B cells_C1                       | TUBA1B                                   |
| Fibroblast_C2 | ZC3H12A  | macrophage_C1 | CD48      | B cells_C2                       | WTAP                                     |
| Fibroblast_C2 | EMP1     | macrophage_C1 | FNDC3B    | B cells_C2                       | TPT1                                     |
| Fibroblast_C2 | CEBPB    | macrophage_C1 | SERPINA1  | B cells_C2                       | PFDN5                                    |
| Fibroblast_C2 | NACA     | macrophage_C1 | IRAK2     | B cells_C2                       | YPEL5                                    |
| Fibroblast_C2 | RIPK2    | macrophage_C1 | PIM3      | B cells_C2                       | H3F3B                                    |
| Fibroblast_C2 | PLAUR    | macrophage_C1 | SLC2A3    | B cells_C2                       | EIF1                                     |
| Fibroblast_C2 | ZFP36L1  | macrophage_C1 | MARCKS    | B cells_C3                       | HNRNPC                                   |
| Fibroblast_C2 | SDC4     | macrophage_C1 | LINC00152 | B cells_C4                       | IER2                                     |
| Fibroblast_C2 | C1orf56  | macrophage_C1 | REL       | B cells_C4                       | C12orf57                                 |
| Fibroblast_C2 | REL      | macrophage_C1 | CCL4L2    | B cells_C4                       | GADD45B                                  |
| Fibroblast_C2 | PIM1     | macrophage_C1 | RNF144B   | B cells_C4                       | MT-ND2                                   |
| Fibroblast_C2 | ABCA1    | macrophage_C1 | ISG20     | B cells_C4                       | CITED2                                   |
| Fibroblast_C2 | EIF3L    | macrophage_C1 | PPP1CB    | B cells_C4                       | MT-CO2                                   |
| Fibroblast_C2 | IGF1     | macrophage_C1 | ARFGAP3   | B cells_C4                       | LINC00152                                |
| Fibroblast_C2 | EPAS1    | macrophage_C1 | BIRC3     | B cells_C4                       | PRDM1                                    |
| Fibroblast_C2 | NINJ1    | macrophage_C1 | METTL9    | B cells_C4                       | MT-CO1                                   |
| Fibroblast_C2 | LMNA     | macrophage_C1 | PDE4DIP   | B cells_C4                       | AKAP9                                    |
| Fibroblast_C2 | TRIB1    | macrophage_C1 | STX11     | B cells_C4                       | ACADVL                                   |
| Fibroblast_C2 | PTPN1    | macrophage_C1 | SERPINB1  | B cells_C4                       | MT-ND4                                   |
| Fibroblast_C2 | LRRFIP1  | macrophage_C1 | ELL2      | B cells_C4                       | N4BP2L2                                  |
| Fibroblast_C2 | G0S2     | macrophage_C1 | DUSP6     | B cells_C4                       | FOSB                                     |
| Fibroblast_C2 | NR4A3    | macrophage_C1 | MCEMP1    | B cells_C4                       | MT-CYB                                   |
| Fibroblast_C2 | NPC2     | macrophage_C1 | ARL8B     | B cells_C4                       | FOS                                      |
| Fibroblast_C2 | S100P    | macrophage_C1 | BACH1     | B cells_C4                       | JUN                                      |
| Fibroblast_C2 | TPT1     | macrophage_C1 | IL6       | B cells_C4                       | MT-CO3                                   |
| Fibroblast_C2 | ARID5B   | macrophage_C1 | PMAIP1    | B cells_C4                       | PPP1R10                                  |
| Fibroblast_C2 | TOP1     | macrophage_C1 | SMIM3     |                                  |                                          |
| Fibroblast_C2 | SLC16A1  | macrophage_C1 | GRAMD1A   |                                  |                                          |
| Fibroblast_C2 | SDCBP    | macrophage_C1 | KMO       |                                  |                                          |
| Fibroblast_C2 | HIF1A    | macrophage_C1 | TWISTNB   |                                  |                                          |
| Fibroblast_C2 | MARCKSL1 | macrophage_C1 | NUMB      |                                  |                                          |
| Fibroblast_C2 | ZFAS1    | macrophage_C1 | UPP1      |                                  |                                          |
| Fibroblast_C2 | TM4SF1   | macrophage_C1 | BNIP3L    |                                  |                                          |
| Fibroblast_C2 | CREG1    | macrophage_C1 | PNPLA8    |                                  |                                          |
| Fibroblast_C2 | MEDAG    | macrophage_C1 | LDHA      |                                  |                                          |
| Fibroblast_C2 | KRT8     | macrophage_C1 | SPHK1     |                                  |                                          |

|               |          |               |           |
|---------------|----------|---------------|-----------|
| Fibroblast_C2 | CTNNAL1  | macrophage_C1 | MAP2K1    |
| Fibroblast_C2 | TNFAIP6  | macrophage_C1 | B4GALT5   |
| Fibroblast_C2 | SLC39A8  | macrophage_C1 | MARCKSL1  |
| Fibroblast_C2 | MT1E     | macrophage_C1 | C4orf3    |
| Fibroblast_C2 | PLIN2    | macrophage_C1 | MIR155HG  |
| Fibroblast_C2 | C3       | macrophage_C1 | CLEC4E    |
| Fibroblast_C2 | ANGPTL4  | macrophage_C1 | BZW1      |
| Fibroblast_C2 | ATP1B1   | macrophage_C2 | HNRNPC    |
| Fibroblast_C2 | MAP3K8   | macrophage_C3 | HNRNPA2B1 |
| Fibroblast_C2 | SRGAP1   | macrophage_C3 | VAMP8     |
| Fibroblast_C2 | TWIST1   | macrophage_C3 | TUBA1B    |
| Fibroblast_C2 | APOE     | macrophage_C3 | C1QA      |
| Fibroblast_C2 | KRT18    | macrophage_C3 | C1QB      |
| Fibroblast_C2 | TUBB4B   | macrophage_C3 | CD74      |
| Fibroblast_C2 | BAZ1A    | macrophage_C3 | C1QC      |
| Fibroblast_C2 | PNPLA8   | macrophage_C3 | PRDX1     |
| Fibroblast_C2 | SLC25A37 | macrophage_C3 | CTSD      |
| Fibroblast_C2 | SLC12A8  | macrophage_C3 | GRN       |
| Fibroblast_C2 | ELL2     | macrophage_C3 | GPX1      |
| Fibroblast_C2 | CXCL6    | macrophage_C3 | HLA-DMB   |
| Fibroblast_C2 | PPP1CB   | macrophage_C3 | RGS1      |
| Fibroblast_C2 | CLU      | macrophage_C3 | HLA-DPA1  |
| Fibroblast_C2 | EIF4B    | macrophage_C3 | CST3      |
| Fibroblast_C2 | CCL2     | macrophage_C3 | CAPG      |
| Fibroblast_C2 | MYADM    | macrophage_C3 | FCGRT     |
| Fibroblast_C2 | SERTAD1  | macrophage_C3 | PPT1      |
| Fibroblast_C2 | RAB31    | macrophage_C3 | CTSC      |
| Fibroblast_C2 | KLF4     | macrophage_C3 | HLA-DRB1  |
| Fibroblast_C2 | RBBP6    | macrophage_C3 | LGALS9    |
| Fibroblast_C2 | MSANTD3  | macrophage_C3 | MGST2     |
| Fibroblast_C2 | CPXM1    | macrophage_C3 | YWHAH     |
| Fibroblast_C2 | KRT19    | macrophage_C3 | ACP5      |
| Fibroblast_C3 | HNRNPC   | macrophage_C3 | HLA-DMA   |
| Fibroblast_C3 | ID1      | macrophage_C3 | NPC2      |
| Fibroblast_C4 | NDUFA4L2 | macrophage_C3 | CALM2     |
| Fibroblast_C4 | RPLP1    | macrophage_C3 | ARHGDI1B  |
| Fibroblast_C4 | CALM3    | macrophage_C3 | CTSB      |
| Fibroblast_C4 | RPL26    | macrophage_C3 | PLD3      |
| Fibroblast_C4 | SRP72    | macrophage_C3 | RNH1      |
| Fibroblast_C4 | N4BP2L2  | macrophage_C3 | BST2      |
| Fibroblast_C4 | RPLP2    | macrophage_C3 | TREM2     |
| Fibroblast_C4 | MTIF3    | macrophage_C3 | APOE      |
| Fibroblast_C4 | DEK      | macrophage_C3 | FCGR3A    |
| Fibroblast_C4 | CHMP5    | macrophage_C3 | MS4A6A    |
| Fibroblast_C4 | MT-ATP6  | macrophage_C3 | TMED9     |
| Fibroblast_C4 | RPS9     | macrophage_C3 | AKR1A1    |
| Fibroblast_C4 | HNRNPR   | macrophage_C3 | TYMP      |
| Fibroblast_C4 | CAST     | macrophage_C3 | CD81      |
| Fibroblast_C4 | VPS29    | macrophage_C3 | ITM2B     |
| Fibroblast_C4 | RPL21    | macrophage_C3 | HLA-DPB1  |
| Fibroblast_C4 | RSL24D1  | macrophage_C3 | SAMHD1    |
| Fibroblast_C4 | RPN2     | macrophage_C3 | PSAP      |
| Fibroblast_C4 | MYEOV2   | macrophage_C3 | CD14      |
| Fibroblast_C4 | ATP1A1   | macrophage_C3 | SLCO2B1   |
| Fibroblast_C4 | RPS19    | macrophage_C3 | MGST3     |
| Fibroblast_C4 | NTMT1    | macrophage_C3 | CSF1R     |
| Fibroblast_C4 | CTNNA1   | macrophage_C3 | ATP5G3    |
| Fibroblast_C4 | RPS17    | macrophage_C3 | CTSZ      |

|               |          |               |          |
|---------------|----------|---------------|----------|
| Fibroblast_C4 | NUDT5    | macrophage_C3 | TMEM176B |
| Fibroblast_C4 | PNISR    | macrophage_C3 | TUBB     |
| Fibroblast_C4 | PQBP1    | macrophage_C3 | CTSA     |
| Fibroblast_C4 | GNL1     | macrophage_C3 | RANBP1   |
| Fibroblast_C4 | ADM      | macrophage_C3 | TUBA1A   |
| Fibroblast_C4 | RPS27A   | macrophage_C3 | C1orf54  |
| Fibroblast_C4 | RPS18    | macrophage_C3 | VSIG4    |
| Fibroblast_C4 | RPS16    | macrophage_C3 | COX5A    |
| Fibroblast_C4 | DDX18    | macrophage_C3 | PSMB8    |
| Fibroblast_C4 | SUPT5H   | macrophage_C3 | PSME2    |
| Fibroblast_C4 | ZC3H15   | macrophage_C3 | LY86     |
| Fibroblast_C4 | ACADVL   | macrophage_C3 | TIMP2    |
| Fibroblast_C4 | DDX17    | macrophage_C3 | HLA-DQB1 |
| Fibroblast_C4 | TRA2A    | macrophage_C3 | ITGB2    |
| Fibroblast_C4 | MT-ND3   | macrophage_C3 | LAP3     |
| Fibroblast_C4 | C1orf123 | macrophage_C3 | HEXA     |
| Fibroblast_C4 | SPCS3    | macrophage_C3 | IER2     |
| Fibroblast_C4 | CLPP     | macrophage_C3 | MNDA     |
| Fibroblast_C4 | IRF2BP2  | macrophage_C3 | LGMN     |
| Fibroblast_C4 | MT-CO3   | macrophage_C3 | FOS      |
| Fibroblast_C4 | RPL37    | macrophage_C3 | VPS29    |
| Fibroblast_C4 | RPS23    | macrophage_C3 | LAMP1    |
| Fibroblast_C4 | MPC2     | macrophage_C3 | LAPTM5   |
| Fibroblast_C4 | ATP6AP1  | macrophage_C3 | STAB1    |
| Fibroblast_C4 | PSMB6    | macrophage_C3 | GSN      |
| Fibroblast_C4 | MT-CO1   | macrophage_C3 | CD163    |
| Fibroblast_C4 | UQCRB    | macrophage_C3 | C1orf162 |
|               |          | macrophage_C3 | SLC16A3  |
|               |          | macrophage_C3 | FABP5    |
|               |          | macrophage_C3 | APOC1    |
|               |          | macrophage_C3 | CORO1A   |
|               |          | macrophage_C3 | TXNIP    |
|               |          | macrophage_C3 | HLA-DRA  |
|               |          | macrophage_C3 | CD9      |
|               |          | macrophage_C3 | TMEM176A |
|               |          | macrophage_C3 | JUNB     |
|               |          | macrophage_C3 | ZFP36L2  |
|               |          | macrophage_C3 | HLA-DQA1 |
|               |          | macrophage_C3 | MS4A4A   |
|               |          | macrophage_C3 | FPR3     |
|               |          | macrophage_C3 | LIPA     |
|               |          | macrophage_C3 | NDUFA4   |
|               |          | macrophage_C3 | FAM26F   |
|               |          | macrophage_C3 | CALR     |
|               |          | macrophage_C3 | TSPO     |
|               |          | macrophage_C3 | HLA-DRB5 |
|               |          | macrophage_C3 | RNASE1   |
|               |          | macrophage_C3 | TGFBI    |
|               |          | macrophage_C3 | GPNMB    |
|               |          | macrophage_C3 | NR4A2    |
|               |          | macrophage_C3 | FGL2     |
|               |          | macrophage_C3 | HMGB1    |
|               |          | macrophage_C3 | STMN1    |
|               |          | macrophage_C3 | RHOB     |
|               |          | macrophage_C3 | SGK1     |
|               |          | macrophage_C3 | PLA2G7   |
|               |          | macrophage_C3 | HLA-DQA2 |
|               |          | macrophage_C3 | PLTP     |



|               |        |
|---------------|--------|
| macrophage_C3 | JUN    |
| macrophage_C3 | DUSP2  |
| macrophage_C3 | SDS    |
| macrophage_C3 | EGR1   |
| macrophage_C3 | FBP1   |
| macrophage_C3 | RGS2   |
| macrophage_C3 | IGHA1  |
| macrophage_C3 | MMP12  |
| macrophage_C3 | CCL2   |
| macrophage_C3 | SPP1   |
| macrophage_C3 | IGLC2  |
| macrophage_C3 | IGHG1  |
| macrophage_C4 | YTHDC1 |
| macrophage_C4 | YTHDF3 |
| macrophage_C4 | CTSZ   |
| macrophage_C4 | CCNL1  |
| macrophage_C5 | FTH1   |

## TableS4 Complex intercellular communication networks between the m6A-mediated immune cells clusters and tumor epithelia cells

| No. | source        | target | ligand | receptor   | prob     | pval | pathv | anno     | evidence                          |
|-----|---------------|--------|--------|------------|----------|------|-------|----------|-----------------------------------|
| 1   | B cells_C1    | Epi    | MIF    | CD74_CXCR4 | 0.042849 | 0    | MIF   | Secreted | PMID: 29637711;<br>PMID: 24760155 |
| 2   | B cells_C2    | Epi    | MIF    | CD74_CXCR4 | 0.04427  | 0    | MIF   | Secreted | PMID: 29637711;<br>PMID: 24760155 |
| 3   | B cells_C3    | Epi    | MIF    | CD74_CXCR4 | 0.04334  | 0    | MIF   | Secreted | PMID: 29637711;<br>PMID: 24760155 |
| 4   | B cells_C4    | Epi    | MIF    | CD74_CXCR4 | 0.045032 | 0    | MIF   | Secreted | PMID: 29637711;<br>PMID: 24760155 |
| 5   | Fibroblast_C1 | Epi    | MIF    | CD74_CXCR4 | 0.040189 | 0    | MIF   | Secreted | PMID: 29637711;<br>PMID: 24760155 |
| 6   | Fibroblast_C2 | Epi    | MIF    | CD74_CXCR4 | 0.034738 | 0    | MIF   | Secreted | PMID: 29637711;<br>PMID: 24760155 |
| 7   | Fibroblast_C3 | Epi    | MIF    | CD74_CXCR4 | 0.04057  | 0    | MIF   | Secreted | PMID: 29637711;<br>PMID: 24760155 |
| 8   | Fibroblast_C4 | Epi    | MIF    | CD74_CXCR4 | 0.041133 | 0    | MIF   | Secreted | PMID: 29637711;<br>PMID: 24760155 |
| 9   | macrophage_C1 | Epi    | MIF    | CD74_CXCR4 | 0.041475 | 0    | MIF   | Secreted | PMID: 29637711;<br>PMID: 24760155 |
| 10  | macrophage_C2 | Epi    | MIF    | CD74_CXCR4 | 0.038475 | 0    | MIF   | Secreted | PMID: 29637711;<br>PMID: 24760155 |
| 11  | macrophage_C3 | Epi    | MIF    | CD74_CXCR4 | 0.038804 | 0    | MIF   | Secreted | PMID: 29637711;<br>PMID: 24760155 |
| 12  | macrophage_C4 | Epi    | MIF    | CD74_CXCR4 | 0.041384 | 0    | MIF   | Secreted | PMID: 29637711;<br>PMID: 24760155 |
| 13  | macrophage_C5 | Epi    | MIF    | CD74_CXCR4 | 0.046389 | 0    | MIF   | Secreted | PMID: 29637711;<br>PMID: 24760155 |
| 14  | T cells_C1    | Epi    | MIF    | CD74_CXCR4 | 0.038105 | 0    | MIF   | Secreted | PMID: 29637711;<br>PMID: 24760155 |
| 15  | T cells_C2    | Epi    | MIF    | CD74_CXCR4 | 0.038286 | 0    | MIF   | Secreted | PMID: 29637711;<br>PMID: 24760155 |
| 16  | T cells_C3    | Epi    | MIF    | CD74_CXCR4 | 0.038144 | 0    | MIF   | Secreted | PMID: 29637711;<br>PMID: 24760155 |
| 17  | T cells_C4    | Epi    | MIF    | CD74_CXCR4 | 0.040714 | 0    | MIF   | Secreted | PMID: 29637711;<br>PMID: 24760155 |
| 18  | T cells_C5    | Epi    | MIF    | CD74_CXCR4 | 0.032326 | 0    | MIF   | Secreted | PMID: 29637711;<br>PMID: 24760155 |
| 19  | B cells_C1    | Epi    | MIF    | CD74_CD44  | 0.036584 | 0    | MIF   | Secreted | PMID: 29637711;<br>PMID: 26175090 |
| 20  | B cells_C2    | Epi    | MIF    | CD74_CD44  | 0.037805 | 0    | MIF   | Secreted | PMID: 29637711;<br>PMID: 26175090 |
| 21  | B cells_C3    | Epi    | MIF    | CD74_CD44  | 0.037006 | 0    | MIF   | Secreted | PMID: 29637711;<br>PMID: 26175090 |
| 22  | B cells_C4    | Epi    | MIF    | CD74_CD44  | 0.038461 | 0    | MIF   | Secreted | PMID: 29637711;<br>PMID: 26175090 |
| 23  | Fibroblast_C1 | Epi    | MIF    | CD74_CD44  | 0.034299 | 0    | MIF   | Secreted | PMID: 29637711;<br>PMID: 26175090 |
| 24  | Fibroblast_C3 | Epi    | MIF    | CD74_CD44  | 0.034626 | 0    | MIF   | Secreted | PMID: 29637711;<br>PMID: 26175090 |
| 25  | macrophage_C1 | Epi    | MIF    | CD74_CD44  | 0.035404 | 0    | MIF   | Secreted | PMID: 29637711;<br>PMID: 26175090 |
| 26  | macrophage_C2 | Epi    | MIF    | CD74_CD44  | 0.032827 | 0    | MIF   | Secreted | PMID: 29637711;<br>PMID: 26175090 |

|    |               |     |        |           |          |      |               |                |                                   |
|----|---------------|-----|--------|-----------|----------|------|---------------|----------------|-----------------------------------|
| 27 | macrophage_C3 | Epi | MIF    | CD74_CD44 | 0.03311  | 0    | MIF           | Secret         | PMID: 29637711;<br>PMID: 26175090 |
| 28 | macrophage_C4 | Epi | MIF    | CD74_CD44 | 0.035325 | 0    | MIF           | Secret         | PMID: 29637711;<br>PMID: 26175090 |
| 29 | macrophage_C5 | Epi | MIF    | CD74_CD44 | 0.039628 | 0    | MIF           | Secret         | PMID: 29637711;<br>PMID: 26175090 |
| 30 | T cells_C1    | Epi | MIF    | CD74_CD44 | 0.03251  | 0    | MIF           | Secret         | PMID: 29637711;<br>PMID: 26175090 |
| 31 | T cells_C2    | Epi | MIF    | CD74_CD44 | 0.032665 | 0    | MIF           | Secret         | PMID: 29637711;<br>PMID: 26175090 |
| 32 | T cells_C3    | Epi | MIF    | CD74_CD44 | 0.032543 | 0    | MIF           | Secret         | PMID: 29637711;<br>PMID: 26175090 |
| 33 | T cells_C4    | Epi | MIF    | CD74_CD44 | 0.03475  | 0    | MIF           | Secret         | PMID: 29637711;<br>PMID: 26175090 |
| 34 | B cells_C1    | Epi | MDK    | NCL       | 0.00522  | 0    | MK            | Secret         | PMID: 28356350                    |
| 35 | B cells_C2    | Epi | MDK    | NCL       | 0.004636 | 0    | MK            | Secret         | PMID: 28356350                    |
| 36 | B cells_C3    | Epi | MDK    | NCL       | 0.005028 | 0    | MK            | Secret         | PMID: 28356350                    |
| 37 | B cells_C4    | Epi | MDK    | NCL       | 0.005005 | 0    | MK            | Secret         | PMID: 28356350                    |
| 38 | Fibroblast_C1 | Epi | MDK    | NCL       | 0.004081 | 0    | MK            | Secret         | PMID: 28356350                    |
| 39 | Fibroblast_C3 | Epi | MDK    | NCL       | 0.003809 | 0    | MK            | Secret         | PMID: 28356350                    |
| 40 | macrophage_C1 | Epi | MDK    | NCL       | 0.003045 | 0.05 | MK            | Secret         | PMID: 28356350                    |
| 41 | macrophage_C2 | Epi | MDK    | NCL       | 0.003219 | 0.02 | MK            | Secret         | PMID: 28356350                    |
| 42 | macrophage_C4 | Epi | MDK    | NCL       | 0.003857 | 0    | MK            | Secret         | PMID: 28356350                    |
| 43 | macrophage_C5 | Epi | MDK    | NCL       | 0.004204 | 0.03 | MK            | Secret         | PMID: 28356350                    |
| 44 | T cells_C1    | Epi | MDK    | NCL       | 0.002749 | 0    | MK            | Secret         | PMID: 28356350                    |
| 45 | T cells_C4    | Epi | MDK    | NCL       | 0.003613 | 0    | MK            | Secret         | PMID: 28356350                    |
| 46 | B cells_C1    | Epi | LGALS9 | PTPRC     | 0.001366 | 0    | GALEC         | Secret         | PMID: 30120235                    |
| 47 | B cells_C2    | Epi | LGALS9 | PTPRC     | 0.001356 | 0    | GALEC         | Secret         | PMID: 30120235                    |
| 48 | B cells_C3    | Epi | LGALS9 | PTPRC     | 0.001336 | 0    | GALEC         | Secret         | PMID: 30120235                    |
| 49 | B cells_C4    | Epi | LGALS9 | PTPRC     | 0.00122  | 0    | GALEC         | Secret         | PMID: 30120235                    |
| 50 | Fibroblast_C1 | Epi | LGALS9 | PTPRC     | 0.000853 | 0    | GALEC         | Secret         | PMID: 30120235                    |
| 51 | Fibroblast_C3 | Epi | LGALS9 | PTPRC     | 0.000799 | 0.01 | GALEC         | Secret         | PMID: 30120235                    |
| 52 | Fibroblast_C4 | Epi | LGALS9 | PTPRC     | 0.001613 | 0    | GALEC         | Secret         | PMID: 30120235                    |
| 53 | macrophage_C4 | Epi | LGALS9 | PTPRC     | 0.001111 | 0    | GALEC         | Secret         | PMID: 30120235                    |
| 54 | macrophage_C5 | Epi | LGALS9 | PTPRC     | 0.001138 | 0.01 | GALEC         | Secret         | PMID: 30120235                    |
| 55 | T cells_C1    | Epi | LGALS9 | PTPRC     | 0.000905 | 0    | GALEC         | Secret         | PMID: 30120235                    |
| 56 | T cells_C2    | Epi | LGALS9 | PTPRC     | 0.000719 | 0    | GALEC         | Secret         | PMID: 30120235                    |
| 57 | T cells_C4    | Epi | LGALS9 | PTPRC     | 0.001105 | 0    | GALEC         | Secret         | PMID: 30120235                    |
| 58 | Fibroblast_C2 | Epi | ADGRE1 | CD55      | 0.001687 | 0.04 | ADGRE Cell-C1 | PMID: 11297558 |                                   |
| 59 | macrophage_C1 | Epi | ADGRE1 | CD55      | 0.001544 | 0    | ADGRE Cell-C1 | PMID: 11297558 |                                   |
| 60 | macrophage_C2 | Epi | ADGRE1 | CD55      | 0.001437 | 0.03 | ADGRE Cell-C1 | PMID: 11297558 |                                   |
| 61 | B cells_C1    | Epi | APP    | CD74      | 0.011216 | 0    | APP Cell-C1   | PMID: 19849849 |                                   |
| 62 | B cells_C2    | Epi | APP    | CD74      | 0.01085  | 0    | APP Cell-C1   | PMID: 19849849 |                                   |
| 63 | B cells_C3    | Epi | APP    | CD74      | 0.010723 | 0    | APP Cell-C1   | PMID: 19849849 |                                   |
| 64 | B cells_C4    | Epi | APP    | CD74      | 0.010317 | 0    | APP Cell-C1   | PMID: 19849849 |                                   |
| 65 | Fibroblast_C1 | Epi | APP    | CD74      | 0.009888 | 0    | APP Cell-C1   | PMID: 19849849 |                                   |
| 66 | Fibroblast_C3 | Epi | APP    | CD74      | 0.009524 | 0    | APP Cell-C1   | PMID: 19849849 |                                   |
| 67 | macrophage_C5 | Epi | APP    | CD74      | 0.009111 | 0.01 | APP Cell-C1   | PMID: 19849849 |                                   |
| 68 | T cells_C1    | Epi | APP    | CD74      | 0.008661 | 0    | APP Cell-C1   | PMID: 19849849 |                                   |
| 69 | T cells_C2    | Epi | APP    | CD74      | 0.008406 | 0    | APP Cell-C1   | PMID: 19849849 |                                   |
| 70 | T cells_C3    | Epi | APP    | CD74      | 0.007899 | 0    | APP Cell-C1   | PMID: 19849849 |                                   |
| 71 | T cells_C4    | Epi | APP    | CD74      | 0.009232 | 0    | APP Cell-C1   | PMID: 19849849 |                                   |
| 72 | Fibroblast_C1 | Epi | CD99   | CD99      | 0.016443 | 0.02 | CD99 Cell-C1  | KEGG: hsa04514 |                                   |
| 73 | Fibroblast_C3 | Epi | CD99   | CD99      | 0.016498 | 0.04 | CD99 Cell-C1  | KEGG: hsa04514 |                                   |
| 74 | Fibroblast_C2 | Epi | CLEC2E | KLRB1     | 0.002957 | 0    | CLEC Cell-C1  | PMID: 24223577 |                                   |
| 75 | macrophage_C1 | Epi | CLEC2E | KLRB1     | 0.002651 | 0    | CLEC Cell-C1  | PMID: 24223577 |                                   |
| 76 | B cells_C1    | Epi | CLEC2B | KLRB1     | 0.000529 | 0    | CLEC Cell-C1  | PMID: 24223577 |                                   |
| 77 | Fibroblast_C1 | Epi | CLEC2B | KLRB1     | 0.00125  | 0    | CLEC Cell-C1  | PMID: 24223577 |                                   |

|     |               |     |        |       |          |   |      |                                |
|-----|---------------|-----|--------|-------|----------|---|------|--------------------------------|
| 78  | Fibroblast_C3 | Epi | CLEC2B | KLRB1 | 0.001243 | 0 | CLEC | Cell-C $\alpha$ PMID: 24223577 |
| 79  | Fibroblast_C4 | Epi | CLEC2B | KLRB1 | 0.002367 | 0 | CLEC | Cell-C $\alpha$ PMID: 24223577 |
| 80  | macrophage_C1 | Epi | CLEC2B | KLRB1 | 0.001268 | 0 | CLEC | Cell-C $\alpha$ PMID: 24223577 |
| 81  | macrophage_C2 | Epi | CLEC2B | KLRB1 | 0.000984 | 0 | CLEC | Cell-C $\alpha$ PMID: 24223577 |
| 82  | macrophage_C3 | Epi | CLEC2B | KLRB1 | 0.000907 | 0 | CLEC | Cell-C $\alpha$ PMID: 24223577 |
| 83  | macrophage_C4 | Epi | CLEC2B | KLRB1 | 0.000766 | 0 | CLEC | Cell-C $\alpha$ PMID: 24223577 |
| 84  | T cells_C1    | Epi | CLEC2B | KLRB1 | 0.001103 | 0 | CLEC | Cell-C $\alpha$ PMID: 24223577 |
| 85  | T cells_C2    | Epi | CLEC2B | KLRB1 | 0.001239 | 0 | CLEC | Cell-C $\alpha$ PMID: 24223577 |
| 86  | T cells_C3    | Epi | CLEC2B | KLRB1 | 0.000924 | 0 | CLEC | Cell-C $\alpha$ PMID: 24223577 |
| 87  | T cells_C4    | Epi | CLEC2B | KLRB1 | 0.001117 | 0 | CLEC | Cell-C $\alpha$ PMID: 24223577 |
| 88  | T cells_C5    | Epi | CLEC2B | KLRB1 | 0.001558 | 0 | CLEC | Cell-C $\alpha$ PMID: 24223577 |
| 89  | Fibroblast_C1 | Epi | CD69   | KLRB1 | 0.000632 | 0 | CLEC | Cell-C $\alpha$ PMID: 24223577 |
| 90  | Fibroblast_C2 | Epi | CD69   | KLRB1 | 0.003227 | 0 | CLEC | Cell-C $\alpha$ PMID: 24223577 |
| 91  | Fibroblast_C3 | Epi | CD69   | KLRB1 | 0.001116 | 0 | CLEC | Cell-C $\alpha$ PMID: 24223577 |
| 92  | macrophage_C1 | Epi | CD69   | KLRB1 | 0.003321 | 0 | CLEC | Cell-C $\alpha$ PMID: 24223577 |
| 93  | macrophage_C2 | Epi | CD69   | KLRB1 | 0.003034 | 0 | CLEC | Cell-C $\alpha$ PMID: 24223577 |
| 94  | macrophage_C3 | Epi | CD69   | KLRB1 | 0.003053 | 0 | CLEC | Cell-C $\alpha$ PMID: 24223577 |
| 95  | macrophage_C4 | Epi | CD69   | KLRB1 | 0.002804 | 0 | CLEC | Cell-C $\alpha$ PMID: 24223577 |
| 96  | macrophage_C5 | Epi | CD69   | KLRB1 | 0.000559 | 0 | CLEC | Cell-C $\alpha$ PMID: 24223577 |
| 97  | T cells_C1    | Epi | CD69   | KLRB1 | 0.001869 | 0 | CLEC | Cell-C $\alpha$ PMID: 24223577 |
| 98  | T cells_C2    | Epi | CD69   | KLRB1 | 0.001967 | 0 | CLEC | Cell-C $\alpha$ PMID: 24223577 |
| 99  | T cells_C3    | Epi | CD69   | KLRB1 | 0.002253 | 0 | CLEC | Cell-C $\alpha$ PMID: 24223577 |
| 100 | T cells_C4    | Epi | CD69   | KLRB1 | 0.001094 | 0 | CLEC | Cell-C $\alpha$ PMID: 24223577 |
| 101 | T cells_C5    | Epi | CD69   | KLRB1 | 0.002728 | 0 | CLEC | Cell-C $\alpha$ PMID: 24223577 |

**TableS5: REAC analysis for Each m6A-mediated subClusters**

| subtype | p_value | term_size | query_size | intersection_size | precision | recall | term_id          | term_name                      | effective_domain_size | source_order | FDR   |
|---------|---------|-----------|------------|-------------------|-----------|--------|------------------|--------------------------------|-----------------------|--------------|-------|
| mac_C1  | 0.000   | 45        | 86         | 12                | 0.14      | 0.27   | REAC:R-HSA-67837 | Interleukin-10 signal          | 10622                 | 1130         | 0.000 |
| mac_C1  | 0.000   | 459       | 86         | 22                | 0.256     | 0.05   | REAC:R-HSA-44914 | Signaling by Interleu          | 10622                 | 2054         | 0.000 |
| mac_C1  | 0.000   | 696       | 86         | 25                | 0.291     | 0.04   | REAC:R-HSA-12802 | Cytokine Signaling in          | 10622                 | 393          | 0.000 |
| mac_C1  | 0.000   | 92        | 86         | 9                 | 0.105     | 0.1    | REAC:R-HSA-16816 | Toll Like Receptor 3 (         | 10622                 | 2297         | 0.000 |
| mac_C1  | 0.000   | 96        | 86         | 9                 | 0.105     | 0.09   | REAC:R-HSA-16616 | MyD88-independent              | 10622                 | 1372         | 0.000 |
| mac_C1  | 0.000   | 96        | 86         | 9                 | 0.105     | 0.09   | REAC:R-HSA-93706 | TRIF(TICAM1)-media             | 10622                 | 2251         | 0.000 |
| mac_C1  | 0.000   | ###       | 86         | 27                | 0.314     | 0.02   | REAC:R-HSA-16824 | Innate Immune System           | 10622                 | 1100         | 0.000 |
| mac_C1  | 0.000   | 101       | 86         | 9                 | 0.105     | 0.09   | REAC:R-HSA-90207 | Interleukin-1 signalin         | 10622                 | 1129         | 0.000 |
| mac_C1  | 0.000   | 84        | 86         | 8                 | 0.093     | 0.1    | REAC:R-HSA-16817 | Toll Like Receptor 5 (         | 10622                 | 2299         | 0.000 |
| mac_C1  | 0.000   | 57        | 86         | 7                 | 0.081     | 0.12   | REAC:R-HSA-38010 | Chemokine receptors            | 10622                 | 323          | 0.000 |
| mac_C1  | 0.000   | 84        | 86         | 8                 | 0.093     | 0.1    | REAC:R-HSA-16814 | Toll Like Receptor 10          | 10622                 | 2295         | 0.000 |
| mac_C1  | 0.000   | 84        | 86         | 8                 | 0.093     | 0.1    | REAC:R-HSA-97587 | MyD88 cascade initia           | 10622                 | 1368         | 0.000 |
| mac_C1  | 0.000   | 89        | 86         | 8                 | 0.093     | 0.09   | REAC:R-HSA-97513 | TRAF6 mediated indu            | 10622                 | 2248         | 0.000 |
| mac_C1  | 0.000   | 90        | 86         | 8                 | 0.093     | 0.09   | REAC:R-HSA-97515 | MyD88 dependent ca             | 10622                 | 1371         | 0.000 |
| mac_C1  | 0.000   | 91        | 86         | 8                 | 0.093     | 0.09   | REAC:R-HSA-16818 | Toll Like Receptor 7/          | 10622                 | 2300         | 0.000 |
| mac_C1  | 0.000   | 94        | 86         | 8                 | 0.093     | 0.09   | REAC:R-HSA-16813 | Toll Like Receptor 9 (         | 10622                 | 2301         | 0.000 |
| mac_C1  | 0.000   | 126       | 86         | 9                 | 0.105     | 0.07   | REAC:R-HSA-16601 | Toll Like Receptor 4 (         | 10622                 | 2298         | 0.000 |
| mac_C1  | 0.000   | 94        | 86         | 8                 | 0.093     | 0.09   | REAC:R-HSA-16605 | MyD88:MAL(TIRAP) d             | 10622                 | 1373         | 0.000 |
| mac_C1  | 0.000   | 94        | 86         | 8                 | 0.093     | 0.09   | REAC:R-HSA-16818 | Toll Like Receptor TL          | 10622                 | 2303         | 0.000 |
| mac_C1  | 0.000   | 97        | 86         | 8                 | 0.093     | 0.08   | REAC:R-HSA-18143 | Toll Like Receptor 2 (         | 10622                 | 2296         | 0.000 |
| mac_C1  | 0.000   | 97        | 86         | 8                 | 0.093     | 0.08   | REAC:R-HSA-16817 | Toll Like Receptor TL          | 10622                 | 2302         | 0.000 |
| mac_C1  | 0.000   | 138       | 86         | 9                 | 0.105     | 0.07   | REAC:R-HSA-44665 | Interleukin-1 family s         | 10622                 | 1127         | 0.000 |
| mac_C1  | 0.000   | 152       | 86         | 9                 | 0.105     | 0.06   | REAC:R-HSA-16889 | Toll-like Receptor Ca          | 10622                 | 2304         | 0.000 |
| mac_C1  | 0.000   | 476       | 86         | 15                | 0.174     | 0.03   | REAC:R-HSA-67986 | Neutrophil degranula           | 10622                 | 1458         | 0.000 |
| mac_C1  | 0.000   | 63        | 86         | 6                 | 0.07      | 0.1    | REAC:R-HSA-45029 | MAP kinase activatio           | 10622                 | 1231         | 0.000 |
| mac_C1  | 0.000   | 71        | 86         | 6                 | 0.07      | 0.08   | REAC:R-HSA-44842 | Interleukin-17 signal          | 10622                 | 1134         | 0.001 |
| mac_C1  | 0.000   | 22        | 86         | 4                 | 0.047     | 0.18   | REAC:R-HSA-11240 | RAF-independent M              | 10622                 | 1689         | 0.001 |
| mac_C1  | 0.000   | 8         | 86         | 3                 | 0.035     | 0.38   | REAC:R-HSA-44870 | Interleukin-1 process          | 10622                 | 1128         | 0.001 |
| mac_C1  | 0.000   | 110       | 86         | 7                 | 0.081     | 0.06   | REAC:R-HSA-67858 | Interleukin-4 and Int          | 10622                 | 1148         | 0.001 |
| mac_C1  | 0.001   | 24        | 86         | 4                 | 0.047     | 0.17   | REAC:R-HSA-96608 | Purinergic signaling i         | 10622                 | 1674         | 0.001 |
| mac_C1  | 0.001   | 24        | 86         | 4                 | 0.047     | 0.17   | REAC:R-HSA-96644 | Cell recruitment (pro          | 10622                 | 304          | 0.001 |
| mac_C1  | 0.002   | 32        | 86         | 4                 | 0.047     | 0.13   | REAC:R-HSA-44598 | TAK1 activates NFkB            | 10622                 | 2202         | 0.002 |
| mac_C1  | 0.002   | 14        | 86         | 3                 | 0.035     | 0.21   | REAC:R-HSA-71240 | Tryptophan catabolis           | 10622                 | 2385         | 0.003 |
| mac_C1  | 0.004   | 16        | 86         | 3                 | 0.035     | 0.19   | REAC:R-HSA-56842 | MAP3K8 (TPL2)-depe             | 10622                 | 1233         | 0.005 |
| mac_C1  | 0.012   | 24        | 86         | 3                 | 0.035     | 0.13   | REAC:R-HSA-93354 | TRAF6 mediated NF-             | 10622                 | 2247         | 0.014 |
| mac_C1  | 0.012   | 55        | 86         | 4                 | 0.047     | 0.07   | REAC:R-HSA-16864 | Nucleotide-binding d           | 10622                 | 1485         | 0.014 |
| mac_C1  | 0.012   | 195       | 86         | 7                 | 0.081     | 0.04   | REAC:R-HSA-37527 | Peptide ligand-bindin          | 10622                 | 1578         | 0.014 |
| mac_C1  | 0.012   | 6         | 86         | 2                 | 0.023     | 0.33   | REAC:R-HSA-56606 | CLEC7A/inflammasom             | 10622                 | 259          | 0.014 |
| mac_C1  | 0.015   | 7         | 86         | 2                 | 0.023     | 0.29   | REAC:R-HSA-56030 | IkB $\alpha$ variant leads to  | 10622                 | 1068         | 0.018 |
| mac_C1  | 0.026   | 9         | 86         | 2                 | 0.023     | 0.22   | REAC:R-HSA-11005 | MAPK3 (ERK1) activa            | 10622                 | 1238         | 0.029 |
| mac_C1  | 0.038   | 125       | 86         | 5                 | 0.058     | 0.04   | REAC:R-HSA-11460 | Platelet degranulatio          | 10622                 | 1616         | 0.042 |
| mac_C1  | 0.041   | 39        | 86         | 3                 | 0.035     | 0.08   | REAC:R-HSA-88538 | Transcriptional Regul          | 10622                 | 2328         | 0.045 |
| mac_C1  | 0.043   | 130       | 86         | 5                 | 0.058     | 0.04   | REAC:R-HSA-76005 | Response to elevated           | 10622                 | 1905         | 0.045 |
| mac_C1  | 0.047   | 13        | 86         | 2                 | 0.023     | 0.15   | REAC:R-HSA-20267 | ERKs are inactivated           | 10622                 | 763          | 0.047 |
| mac_C1  | 0.047   | 13        | 86         | 2                 | 0.023     | 0.15   | REAC:R-HSA-20956 | NF- $\kappa$ B is activated ar | 10622                 | 1387         | 0.047 |
| mac_C1  | 0.047   | 42        | 86         | 3                 | 0.035     | 0.07   | REAC:R-HSA-56752 | Negative regulation o          | 10622                 | 1435         | 0.047 |
| mac_C3  | 0.000   | 123       | 98         | 15                | 0.153     | 0.12   | REAC:R-HSA-21322 | MHC class II antigen           | 10622                 | 1256         | 0.000 |
| mac_C3  | 0.000   | ###       | 98         | 36                | 0.367     | 0.03   | REAC:R-HSA-16824 | Innate Immune System           | 10622                 | 1100         | 0.000 |
| mac_C3  | 0.000   | 476       | 98         | 21                | 0.214     | 0.04   | REAC:R-HSA-67986 | Neutrophil degranula           | 10622                 | 1458         | 0.000 |
| mac_C3  | 0.000   | 799       | 98         | 25                | 0.255     | 0.03   | REAC:R-HSA-12802 | Adaptive Immune Sy             | 10622                 | 111          | 0.000 |
| mac_C3  | 0.000   | 20        | 98         | 5                 | 0.051     | 0.25   | REAC:R-HSA-20243 | Translocation of ZAP           | 10622                 | 2355         | 0.000 |

|        |       |     |    |    |       |      |                  |                        |       |      |       |
|--------|-------|-----|----|----|-------|------|------------------|------------------------|-------|------|-------|
| mac_C3 | 0.000 | 23  | 98 | 5  | 0.051 | 0.22 | REAC:R-HSA-20242 | Phosphorylation of C   | 10622 | 1601 | 0.000 |
| mac_C3 | 0.000 | 24  | 98 | 5  | 0.051 | 0.21 | REAC:R-HSA-38994 | PD-1 signaling         | 10622 | 1515 | 0.000 |
| mac_C3 | 0.000 | 696 | 98 | 20 | 0.204 | 0.03 | REAC:R-HSA-12802 | Cytokine Signaling in  | 10622 | 393  | 0.001 |
| mac_C3 | 0.001 | 35  | 98 | 5  | 0.051 | 0.14 | REAC:R-HSA-20243 | Generation of second   | 10622 | 952  | 0.002 |
| mac_C3 | 0.002 | 98  | 98 | 7  | 0.071 | 0.07 | REAC:R-HSA-20242 | Downstream TCR sig     | 10622 | 728  | 0.004 |
| mac_C3 | 0.003 | 193 | 98 | 9  | 0.092 | 0.05 | REAC:R-HSA-91353 | Interferon Signaling   | 10622 | 1123 | 0.006 |
| mac_C3 | 0.003 | 152 | 98 | 8  | 0.082 | 0.05 | REAC:R-HSA-16889 | Toll-like Receptor Ca  | 10622 | 2304 | 0.006 |
| mac_C3 | 0.004 | 120 | 98 | 7  | 0.071 | 0.06 | REAC:R-HSA-20240 | TCR signaling          | 10622 | 2207 | 0.008 |
| mac_C3 | 0.007 | 32  | 98 | 4  | 0.041 | 0.13 | REAC:R-HSA-89640 | Plasma lipoprotein cl  | 10622 | 1609 | 0.012 |
| mac_C3 | 0.009 | 97  | 98 | 6  | 0.061 | 0.06 | REAC:R-HSA-21737 | Binding and Uptake o   | 10622 | 207  | 0.014 |
| mac_C3 | 0.011 | 67  | 98 | 5  | 0.051 | 0.07 | REAC:R-HSA-38884 | Costimulation by the   | 10622 | 379  | 0.017 |
| mac_C3 | 0.013 | 39  | 98 | 4  | 0.041 | 0.1  | REAC:R-HSA-90316 | NGF-stimulated tran    | 10622 | 1391 | 0.018 |
| mac_C3 | 0.027 | 126 | 98 | 6  | 0.061 | 0.05 | REAC:R-HSA-16601 | Toll Like Receptor 4 ( | 10622 | 2298 | 0.033 |
| mac_C3 | 0.027 | 83  | 98 | 5  | 0.051 | 0.06 | REAC:R-HSA-12369 | ER-Phagosome path      | 10622 | 758  | 0.033 |
| mac_C3 | 0.027 | 459 | 98 | 12 | 0.122 | 0.03 | REAC:R-HSA-44914 | Signaling by Interleu  | 10622 | 2054 | 0.033 |
| mac_C3 | 0.029 | 87  | 98 | 5  | 0.051 | 0.06 | REAC:R-HSA-87730 | Interferon gamma sig   | 10622 | 1125 | 0.034 |
| mac_C3 | 0.048 | 61  | 98 | 4  | 0.041 | 0.07 | REAC:R-HSA-17362 | Classical antibody-m   | 10622 | 346  | 0.048 |
| mac_C3 | 0.048 | 61  | 98 | 4  | 0.041 | 0.07 | REAC:R-HSA-19872 | Nuclear Events (kinas  | 10622 | 1475 | 0.048 |
| mac_C3 | 0.048 | 99  | 98 | 5  | 0.051 | 0.05 | REAC:R-HSA-12369 | Antigen processing-(   | 10622 | 144  | 0.048 |
| mac_C3 | 0.048 | 101 | 98 | 5  | 0.051 | 0.05 | REAC:R-HSA-97760 | Regulation of Compl    | 10622 | 1815 | 0.048 |
| mac_C4 | 0.019 | 33  | 1  | 1  | 1     | 0.03 | REAC:R-HSA-56945 | Cargo concentration    | 10622 | 287  | 0.032 |
| mac_C4 | 0.019 | 35  | 1  | 1  | 1     | 0.03 | REAC:R-HSA-43272 | Lysosome Vesicle Bid   | 10622 | 1228 | 0.032 |
| mac_C4 | 0.019 | 18  | 1  | 1  | 1     | 0.06 | REAC:R-HSA-20223 | Metabolism of Angio    | 10622 | 1294 | 0.032 |
| mac_C4 | 0.023 | 68  | 1  | 1  | 1     | 0.01 | REAC:R-HSA-20400 | COPII-mediated vesi    | 10622 | 263  | 0.032 |
| mac_C4 | 0.023 | 72  | 1  | 1  | 1     | 0.01 | REAC:R-HSA-19999 | trans-Golgi Network    | 10622 | 2514 | 0.032 |
| mac_C4 | 0.024 | 89  | 1  | 1  | 1     | 0.01 | REAC:R-HSA-29807 | Peptide hormone me     | 10622 | 1577 | 0.032 |
| mac_C4 | 0.035 | 155 | 1  | 1  | 1     | 0.01 | REAC:R-HSA-19997 | ER to Golgi Anterogr   | 10622 | 757  | 0.037 |
| mac_C4 | 0.037 | 186 | 1  | 1  | 1     | 0.01 | REAC:R-HSA-94802 | Transport to the Golg  | 10622 | 2379 | 0.037 |
| CAF_C1 | 0.000 | 57  | 10 | 4  | 0.4   | 0.07 | REAC:R-HSA-33714 | HSP90 chaperone cy     | 10622 | 1014 | 0.000 |
| CAF_C1 | 0.000 | 14  | 10 | 3  | 0.3   | 0.21 | REAC:R-HSA-33715 | Attenuation phase      | 10622 | 177  | 0.000 |
| CAF_C1 | 0.000 | 24  | 10 | 3  | 0.3   | 0.13 | REAC:R-HSA-33715 | HSF1-dependent tra     | 10622 | 1013 | 0.001 |
| CAF_C1 | 0.003 | 87  | 10 | 3  | 0.3   | 0.03 | REAC:R-HSA-33715 | Cellular response to   | 10622 | 313  | 0.025 |
| CAF_C1 | 0.027 | 44  | 10 | 2  | 0.2   | 0.05 | REAC:R-HSA-96463 | Aggrephagy             | 10622 | 121  | 0.042 |
| CAF_C1 | 0.029 | 4   | 10 | 1  | 0.1   | 0.25 | REAC:R-HSA-96652 | Resistance of ERBB2    | 10622 | 1888 | 0.042 |
| CAF_C1 | 0.029 | 80  | 10 | 2  | 0.2   | 0.03 | REAC:R-HSA-96638 | Selective autophagy    | 10622 | 1986 | 0.042 |
| CAF_C1 | 0.029 | 4   | 10 | 1  | 0.1   | 0.25 | REAC:R-HSA-96652 | Resistance of ERBB2    | 10622 | 1892 | 0.042 |
| CAF_C1 | 0.029 | 4   | 10 | 1  | 0.1   | 0.25 | REAC:R-HSA-96652 | Resistance of ERBB2    | 10622 | 1891 | 0.042 |
| CAF_C1 | 0.029 | 4   | 10 | 1  | 0.1   | 0.25 | REAC:R-HSA-96652 | Resistance of ERBB2    | 10622 | 1890 | 0.042 |
| CAF_C1 | 0.029 | 4   | 10 | 1  | 0.1   | 0.25 | REAC:R-HSA-96652 | Resistance of ERBB2    | 10622 | 1889 | 0.042 |
| CAF_C1 | 0.029 | 2   | 10 | 1  | 0.1   | 0.5  | REAC:R-HSA-19290 | vRNP Assembly          | 10622 | 2516 | 0.042 |
| CAF_C1 | 0.029 | 4   | 10 | 1  | 0.1   | 0.25 | REAC:R-HSA-96652 | Resistance of ERBB2    | 10622 | 1887 | 0.042 |
| CAF_C1 | 0.029 | 79  | 10 | 2  | 0.2   | 0.03 | REAC:R-HSA-88522 | The role of GTSE1 in   | 10622 | 2285 | 0.042 |
| CAF_C1 | 0.029 | 4   | 10 | 1  | 0.1   | 0.25 | REAC:R-HSA-96652 | Resistance of ERBB2    | 10622 | 1886 | 0.042 |
| CAF_C1 | 0.029 | 67  | 10 | 2  | 0.2   | 0.03 | REAC:R-HSA-33714 | Regulation of HSF1-r   | 10622 | 1820 | 0.042 |
| CAF_C1 | 0.029 | 94  | 10 | 2  | 0.2   | 0.02 | REAC:R-HSA-38032 | Recruitment of NuM     | 10622 | 1799 | 0.042 |
| CAF_C1 | 0.029 | 4   | 10 | 1  | 0.1   | 0.25 | REAC:R-HSA-96522 | Drug-mediated inhib    | 10622 | 740  | 0.042 |
| CAF_C1 | 0.029 | 4   | 10 | 1  | 0.1   | 0.25 | REAC:R-HSA-96657 | Drug resistance in ER  | 10622 | 736  | 0.042 |
| CAF_C1 | 0.029 | 4   | 10 | 1  | 0.1   | 0.25 | REAC:R-HSA-96652 | Drug resistance in ER  | 10622 | 735  | 0.042 |
| CAF_C1 | 0.029 | 582 | 10 | 4  | 0.4   | 0.01 | REAC:R-HSA-22627 | Cellular responses to  | 10622 | 317  | 0.042 |
| CAF_C1 | 0.029 | 4   | 10 | 1  | 0.1   | 0.25 | REAC:R-HSA-96652 | Resistance of ERBB2    | 10622 | 1885 | 0.042 |
| CAF_C1 | 0.029 | 1   | 10 | 1  | 0.1   | 1    | REAC:R-HSA-16833 | Viral RNP Complexes    | 10622 | 2421 | 0.042 |
| CAF_C1 | 0.035 | 5   | 10 | 1  | 0.1   | 0.2  | REAC:R-HSA-90134 | RHOBTB2 GTPase cy      | 10622 | 1712 | 0.043 |
| CAF_C1 | 0.036 | 123 | 10 | 2  | 0.2   | 0.02 | REAC:R-HSA-21322 | MHC class II antigen   | 10622 | 1256 | 0.043 |
| CAF_C1 | 0.036 | 6   | 10 | 1  | 0.1   | 0.17 | REAC:R-HSA-30004 | Scavenging by Class    | 10622 | 1982 | 0.043 |
| CAF_C1 | 0.036 | 6   | 10 | 1  | 0.1   | 0.17 | REAC:R-HSA-53364 | Uptake and function    | 10622 | 2402 | 0.043 |
| CAF_C1 | 0.041 | 134 | 10 | 2  | 0.2   | 0.01 | REAC:R-HSA-16328 | Macroautophagy         | 10622 | 1270 | 0.048 |
| CAF_C1 | 0.046 | 476 | 10 | 3  | 0.3   | 0.01 | REAC:R-HSA-67986 | Neutrophil degranula   | 10622 | 1458 | 0.048 |
| CAF_C1 | 0.046 | 152 | 10 | 2  | 0.2   | 0.01 | REAC:R-HSA-16825 | Influenza Infection    | 10622 | 1081 | 0.048 |

|          |       |     |    |    |       |      |                  |                        |       |      |       |
|----------|-------|-----|----|----|-------|------|------------------|------------------------|-------|------|-------|
| CAF_C1   | 0.046 | 9   | 10 | 1  | 0.1   | 0.11 | REAC:R-HSA-96342 | Constitutive Signaling | 10622 | 375  | 0.048 |
| CAF_C1   | 0.050 | 10  | 10 | 1  | 0.1   | 0.1  | REAC:R-HSA-14741 | Tetrahydrobiopterin    | 10622 | 2273 | 0.050 |
| CAF_C2   | 0.000 | 110 | 96 | 11 | 0.115 | 0.1  | REAC:R-HSA-67858 | Interleukin-4 and Int  | 10622 | 1148 | 0.000 |
| CAF_C2   | 0.000 | 45  | 96 | 8  | 0.083 | 0.18 | REAC:R-HSA-67837 | Interleukin-10 signal  | 10622 | 1130 | 0.000 |
| CAF_C2   | 0.000 | 696 | 96 | 23 | 0.24  | 0.03 | REAC:R-HSA-12802 | Cytokine Signaling in  | 10622 | 393  | 0.000 |
| CAF_C2   | 0.000 | 459 | 96 | 18 | 0.188 | 0.04 | REAC:R-HSA-44914 | Signaling by Interleu  | 10622 | 2054 | 0.000 |
| CAF_C2   | 0.000 | 476 | 96 | 16 | 0.167 | 0.03 | REAC:R-HSA-67986 | Neutrophil degranula   | 10622 | 1458 | 0.001 |
| CAF_C2   | 0.002 | ### | 96 | 24 | 0.25  | 0.02 | REAC:R-HSA-16824 | Innate Immune Syste    | 10622 | 1100 | 0.005 |
| CAF_C2   | 0.012 | 57  | 96 | 5  | 0.052 | 0.09 | REAC:R-HSA-38010 | Chemokine receptors    | 10622 | 323  | 0.022 |
| CAF_C2   | 0.022 | 16  | 96 | 3  | 0.031 | 0.19 | REAC:R-HSA-19363 | p75NTR signals via N   | 10622 | 2490 | 0.028 |
| CAF_C2   | 0.022 | 39  | 96 | 4  | 0.042 | 0.1  | REAC:R-HSA-88538 | Transcriptional Regul  | 10622 | 2328 | 0.028 |
| CAF_C2   | 0.022 | 17  | 96 | 3  | 0.031 | 0.18 | REAC:R-HSA-96178 | FOXO-mediated tran     | 10622 | 847  | 0.028 |
| CAF_C2   | 0.029 | 19  | 96 | 3  | 0.031 | 0.16 | REAC:R-HSA-30004 | Scavenging by Class    | 10622 | 1980 | 0.032 |
| CAF_C2   | 0.032 | 5   | 96 | 2  | 0.021 | 0.4  | REAC:R-HSA-88494 | PTK6 Expression        | 10622 | 1560 | 0.032 |
| CAF_C2   | 0.032 | 5   | 96 | 2  | 0.021 | 0.4  | REAC:R-HSA-31349 | LRR FLII-interacting   | 10622 | 1192 | 0.032 |
| CAF_C4   | 0.000 | 113 | 37 | 15 | 0.405 | 0.13 | REAC:R-HSA-17993 | SRP-dependent cotra    | 10622 | 1959 | 0.000 |
| CAF_C4   | 0.000 | 94  | 37 | 12 | 0.324 | 0.13 | REAC:R-HSA-24085 | Selenocysteine synth   | 10622 | 1988 | 0.000 |
| CAF_C4   | 0.000 | 90  | 37 | 12 | 0.324 | 0.13 | REAC:R-HSA-19282 | Viral mRNA Translati   | 10622 | 2422 | 0.000 |
| CAF_C4   | 0.000 | 94  | 37 | 12 | 0.324 | 0.13 | REAC:R-HSA-15684 | Eukaryotic Translatio  | 10622 | 797  | 0.000 |
| CAF_C4   | 0.000 | 94  | 37 | 12 | 0.324 | 0.13 | REAC:R-HSA-72764 | Eukaryotic Translatio  | 10622 | 799  | 0.000 |
| CAF_C4   | 0.000 | 90  | 37 | 12 | 0.324 | 0.13 | REAC:R-HSA-15690 | Peptide chain elonga   | 10622 | 1575 | 0.000 |
| CAF_C4   | 0.000 | 96  | 37 | 12 | 0.324 | 0.13 | REAC:R-HSA-97595 | Nonsense Mediated      | 10622 | 1468 | 0.000 |
| CAF_C4   | 0.000 | 102 | 37 | 12 | 0.324 | 0.12 | REAC:R-HSA-96330 | Response of EIF2AK4    | 10622 | 1903 | 0.000 |
| CAF_C4   | 0.000 | 102 | 37 | 12 | 0.324 | 0.12 | REAC:R-HSA-72689 | Formation of a pool    | 10622 | 875  | 0.000 |
| CAF_C4   | 0.000 | 292 | 37 | 16 | 0.432 | 0.05 | REAC:R-HSA-72766 | Translation            | 10622 | 2343 | 0.000 |
| CAF_C4   | 0.000 | 112 | 37 | 12 | 0.324 | 0.11 | REAC:R-HSA-15682 | L13a-mediated trans    | 10622 | 1186 | 0.000 |
| CAF_C4   | 0.000 | 113 | 37 | 12 | 0.324 | 0.11 | REAC:R-HSA-72706 | GTP hydrolysis and j   | 10622 | 937  | 0.000 |
| CAF_C4   | 0.000 | 116 | 37 | 12 | 0.324 | 0.1  | REAC:R-HSA-92780 | Nonsense-Mediated      | 10622 | 1469 | 0.000 |
| CAF_C4   | 0.000 | 116 | 37 | 12 | 0.324 | 0.1  | REAC:R-HSA-97595 | Nonsense Mediated      | 10622 | 1467 | 0.000 |
| CAF_C4   | 0.000 | 117 | 37 | 12 | 0.324 | 0.1  | REAC:R-HSA-24085 | Selenoamino acid me    | 10622 | 1987 | 0.000 |
| CAF_C4   | 0.000 | 120 | 37 | 12 | 0.324 | 0.1  | REAC:R-HSA-72737 | Cap-dependent Tran     | 10622 | 284  | 0.000 |
| CAF_C4   | 0.000 | 120 | 37 | 12 | 0.324 | 0.1  | REAC:R-HSA-72613 | Eukaryotic Translatio  | 10622 | 798  | 0.000 |
| CAF_C4   | 0.000 | 171 | 37 | 13 | 0.351 | 0.08 | REAC:R-HSA-90105 | Regulation of expres   | 10622 | 1853 | 0.000 |
| CAF_C4   | 0.000 | 133 | 37 | 12 | 0.324 | 0.09 | REAC:R-HSA-16827 | Influenza Viral RNA T  | 10622 | 1082 | 0.000 |
| CAF_C4   | 0.000 | 152 | 37 | 12 | 0.324 | 0.08 | REAC:R-HSA-16825 | Influenza Infection    | 10622 | 1081 | 0.000 |
| CAF_C4   | 0.000 | 157 | 37 | 12 | 0.324 | 0.08 | REAC:R-HSA-97110 | Cellular response to s | 10622 | 315  | 0.000 |
| CAF_C4   | 0.000 | 217 | 37 | 13 | 0.351 | 0.06 | REAC:R-HSA-37617 | Signaling by ROBO r    | 10622 | 2090 | 0.000 |
| CAF_C4   | 0.000 | 183 | 37 | 12 | 0.324 | 0.07 | REAC:R-HSA-67912 | Major pathway of rRN   | 10622 | 1271 | 0.000 |
| CAF_C4   | 0.000 | 193 | 37 | 12 | 0.324 | 0.06 | REAC:R-HSA-88687 | rRNA processing in t   | 10622 | 2499 | 0.000 |
| CAF_C4   | 0.000 | 203 | 37 | 12 | 0.324 | 0.06 | REAC:R-HSA-72312 | rRNA processing        | 10622 | 2497 | 0.000 |
| CAF_C4   | 0.000 | 370 | 37 | 13 | 0.351 | 0.04 | REAC:R-HSA-71291 | Metabolism of amin     | 10622 | 1297 | 0.000 |
| CAF_C4   | 0.000 | 909 | 37 | 18 | 0.486 | 0.02 | REAC:R-HSA-56632 | Infectious disease     | 10622 | 1079 | 0.000 |
| CAF_C4   | 0.000 | 52  | 37 | 7  | 0.189 | 0.13 | REAC:R-HSA-72695 | Formation of the terr  | 10622 | 886  | 0.000 |
| CAF_C4   | 0.000 | 59  | 37 | 7  | 0.189 | 0.12 | REAC:R-HSA-72702 | Ribosomal scanning     | 10622 | 1919 | 0.000 |
| CAF_C4   | 0.000 | 59  | 37 | 7  | 0.189 | 0.12 | REAC:R-HSA-72649 | Translation initiation | 10622 | 2344 | 0.000 |
| CAF_C4   | 0.000 | 60  | 37 | 7  | 0.189 | 0.12 | REAC:R-HSA-72662 | Activation of the mR   | 10622 | 99   | 0.000 |
| CAF_C4   | 0.000 | 549 | 37 | 13 | 0.351 | 0.02 | REAC:R-HSA-42247 | Axon guidance          | 10622 | 182  | 0.000 |
| CAF_C4   | 0.000 | 574 | 37 | 13 | 0.351 | 0.02 | REAC:R-HSA-96751 | Nervous system deve    | 10622 | 1445 | 0.000 |
| CAF_C4   | 0.000 | 582 | 37 | 13 | 0.351 | 0.02 | REAC:R-HSA-22627 | Cellular responses to  | 10622 | 317  | 0.000 |
| CAF_C4   | 0.000 | 175 | 37 | 6  | 0.162 | 0.03 | REAC:R-HSA-14285 | The citric acid (TCA)  | 10622 | 2280 | 0.000 |
| CAF_C4   | 0.001 | 125 | 37 | 5  | 0.135 | 0.04 | REAC:R-HSA-16320 | Respiratory electron   | 10622 | 1901 | 0.001 |
| CAF_C4   | 0.005 | 101 | 37 | 4  | 0.108 | 0.04 | REAC:R-HSA-61110 | Respiratory electron   | 10622 | 1900 | 0.005 |
| CAF_C4   | 0.047 | 28  | 37 | 2  | 0.054 | 0.07 | REAC:R-HSA-16258 | Budding and matura     | 10622 | 240  | 0.047 |
| CD8+ T c | 0.003 | 909 | 34 | 12 | 0.353 | 0.01 | REAC:R-HSA-56632 | Infectious disease     | 10622 | 1079 | 0.017 |
| CD8+ T c | 0.003 | 380 | 34 | 8  | 0.235 | 0.02 | REAC:R-HSA-56632 | Diseases of signal tra | 10622 | 712  | 0.017 |
| CD8+ T c | 0.003 | ### | 34 | 13 | 0.382 | 0.01 | REAC:R-HSA-16824 | Innate Immune Syste    | 10622 | 1100 | 0.017 |
| CD8+ T c | 0.004 | 476 | 34 | 8  | 0.235 | 0.02 | REAC:R-HSA-67986 | Neutrophil degranula   | 10622 | 1458 | 0.017 |
| CD8+ T c | 0.004 | 226 | 34 | 6  | 0.176 | 0.03 | REAC:R-HSA-16290 | HIV Infection          | 10622 | 1005 | 0.017 |

|          |       |     |    |   |       |      |                  |                        |       |      |       |
|----------|-------|-----|----|---|-------|------|------------------|------------------------|-------|------|-------|
| CD8+ T c | 0.004 | 148 | 34 | 5 | 0.147 | 0.03 | REAC:R-HSA-45327 | Mitotic G1 phase and   | 10622 | 1352 | 0.017 |
| CD8+ T c | 0.004 | 131 | 34 | 5 | 0.147 | 0.04 | REAC:R-HSA-69206 | G1/S Transition        | 10622 | 914  | 0.017 |
| CD8+ T c | 0.004 | 74  | 34 | 4 | 0.118 | 0.05 | REAC:R-HSA-17417 | APC/C:Cdh1 mediate     | 10622 | 24   | 0.017 |
| CD8+ T c | 0.004 | 77  | 34 | 4 | 0.118 | 0.05 | REAC:R-HSA-17681 | Activation of APC/C    | 10622 | 68   | 0.017 |
| CD8+ T c | 0.004 | 76  | 34 | 4 | 0.118 | 0.05 | REAC:R-HSA-17640 | APC/C:Cdc20 mediat     | 10622 | 23   | 0.017 |
| CD8+ T c | 0.004 | 68  | 34 | 4 | 0.118 | 0.06 | REAC:R-HSA-17415 | APC/C:Cdc20 mediat     | 10622 | 22   | 0.017 |
| CD8+ T c | 0.004 | 120 | 34 | 5 | 0.147 | 0.04 | REAC:R-HSA-69239 | Synthesis of DNA       | 10622 | 2159 | 0.017 |
| CD8+ T c | 0.004 | 79  | 34 | 4 | 0.118 | 0.05 | REAC:R-HSA-88522 | The role of GTSE1 in   | 10622 | 2285 | 0.017 |
| CD8+ T c | 0.004 | 81  | 34 | 4 | 0.118 | 0.05 | REAC:R-HSA-90136 | Signaling by NOTCH     | 10622 | 2074 | 0.017 |
| CD8+ T c | 0.004 | 32  | 34 | 3 | 0.088 | 0.09 | REAC:R-HSA-70263 | Gluconeogenesis        | 10622 | 959  | 0.017 |
| CD8+ T c | 0.004 | 162 | 34 | 5 | 0.147 | 0.03 | REAC:R-HSA-69242 | S Phase                | 10622 | 1924 | 0.017 |
| CD8+ T c | 0.004 | 85  | 34 | 4 | 0.118 | 0.05 | REAC:R-HSA-69002 | DNA Replication Pre    | 10622 | 414  | 0.017 |
| CD8+ T c | 0.004 | 88  | 34 | 4 | 0.118 | 0.05 | REAC:R-HSA-45327 | Regulation of mitotic  | 10622 | 1866 | 0.017 |
| CD8+ T c | 0.004 | 88  | 34 | 4 | 0.118 | 0.05 | REAC:R-HSA-17414 | APC/C-mediated deg     | 10622 | 20   | 0.017 |
| CD8+ T c | 0.004 | 174 | 34 | 5 | 0.147 | 0.03 | REAC:R-HSA-10958 | Apoptosis              | 10622 | 149  | 0.017 |
| CD8+ T c | 0.004 | 94  | 34 | 4 | 0.118 | 0.04 | REAC:R-HSA-88781 | Transcriptional regul  | 10622 | 2334 | 0.017 |
| CD8+ T c | 0.005 | 98  | 34 | 4 | 0.118 | 0.04 | REAC:R-HSA-20242 | Downstream TCR sig     | 10622 | 728  | 0.017 |
| CD8+ T c | 0.005 | 549 | 34 | 8 | 0.235 | 0.01 | REAC:R-HSA-69278 | Cell Cycle, Mitotic    | 10622 | 301  | 0.017 |
| CD8+ T c | 0.005 | 101 | 34 | 4 | 0.118 | 0.04 | REAC:R-HSA-90207 | Interleukin-1 signalin | 10622 | 1129 | 0.017 |
| CD8+ T c | 0.005 | 101 | 34 | 4 | 0.118 | 0.04 | REAC:R-HSA-56896 | UCH proteinases        | 10622 | 2389 | 0.017 |
| CD8+ T c | 0.006 | 198 | 34 | 5 | 0.147 | 0.03 | REAC:R-HSA-45327 | Mitotic G2-G2/M ph     | 10622 | 1353 | 0.017 |
| CD8+ T c | 0.006 | 109 | 34 | 4 | 0.118 | 0.04 | REAC:R-HSA-56963 | Nucleotide Excision R  | 10622 | 1483 | 0.017 |
| CD8+ T c | 0.006 | 196 | 34 | 5 | 0.147 | 0.03 | REAC:R-HSA-69275 | G2/M Transition        | 10622 | 920  | 0.017 |
| CD8+ T c | 0.006 | 14  | 34 | 2 | 0.059 | 0.14 | REAC:R-HSA-53585 | Mismatch repair (MM    | 10622 | 1335 | 0.017 |
| CD8+ T c | 0.006 | 11  | 34 | 2 | 0.059 | 0.18 | REAC:R-HSA-19602 | Formation of annular   | 10622 | 876  | 0.017 |
| CD8+ T c | 0.006 | 53  | 34 | 3 | 0.088 | 0.06 | REAC:R-HSA-16991 | Regulation of Apopto   | 10622 | 1813 | 0.017 |
| CD8+ T c | 0.006 | 52  | 34 | 3 | 0.088 | 0.06 | REAC:R-HSA-69601 | Ubiquitin Mediated D   | 10622 | 2393 | 0.017 |
| CD8+ T c | 0.006 | 52  | 34 | 3 | 0.088 | 0.06 | REAC:R-HSA-75815 | Ubiquitin-dependen     | 10622 | 2394 | 0.017 |
| CD8+ T c | 0.006 | 60  | 34 | 3 | 0.088 | 0.05 | REAC:R-HSA-56107 | GLI3 is processed to   | 10622 | 928  | 0.017 |
| CD8+ T c | 0.006 | 55  | 34 | 3 | 0.088 | 0.05 | REAC:R-HSA-88540 | FBXL7 down-regulat     | 10622 | 815  | 0.017 |
| CD8+ T c | 0.006 | 52  | 34 | 3 | 0.088 | 0.06 | REAC:R-HSA-18053 | Vpu mediated degra     | 10622 | 2438 | 0.017 |
| CD8+ T c | 0.006 | 12  | 34 | 2 | 0.059 | 0.17 | REAC:R-HSA-19087 | Gap junction degrad    | 10622 | 943  | 0.017 |
| CD8+ T c | 0.006 | 12  | 34 | 2 | 0.059 | 0.17 | REAC:R-HSA-33715 | HSF1 activation        | 10622 | 1012 | 0.017 |
| CD8+ T c | 0.006 | 52  | 34 | 3 | 0.088 | 0.06 | REAC:R-HSA-69610 | p53-Independent DN     | 10622 | 2484 | 0.017 |
| CD8+ T c | 0.006 | 53  | 34 | 3 | 0.088 | 0.06 | REAC:R-HSA-18058 | Vif-mediated degra     | 10622 | 2419 | 0.017 |
| CD8+ T c | 0.006 | 54  | 34 | 3 | 0.088 | 0.06 | REAC:R-HSA-89418 | Regulation of RUNX3    | 10622 | 1835 | 0.017 |
| CD8+ T c | 0.006 | 50  | 34 | 3 | 0.088 | 0.06 | REAC:R-HSA-21173 | Regulation of activat  | 10622 | 1847 | 0.017 |
| CD8+ T c | 0.006 | 55  | 34 | 3 | 0.088 | 0.05 | REAC:R-HSA-17411 | SCF-beta-TrCP medi     | 10622 | 1934 | 0.017 |
| CD8+ T c | 0.006 | 60  | 34 | 3 | 0.088 | 0.05 | REAC:R-HSA-18757 | SCF(Skp2)-mediated     | 10622 | 1933 | 0.017 |
| CD8+ T c | 0.006 | 52  | 34 | 3 | 0.088 | 0.06 | REAC:R-HSA-34942 | Autodegradation of t   | 10622 | 179  | 0.017 |
| CD8+ T c | 0.006 | 50  | 34 | 3 | 0.088 | 0.06 | REAC:R-HSA-12369 | Cross-presentation c   | 10622 | 384  | 0.017 |
| CD8+ T c | 0.006 | 13  | 34 | 2 | 0.059 | 0.15 | REAC:R-HSA-14034 | Apoptosis induced D    | 10622 | 150  | 0.017 |
| CD8+ T c | 0.006 | 57  | 34 | 3 | 0.088 | 0.05 | REAC:R-HSA-69541 | Stabilization of p53   | 10622 | 2135 | 0.017 |
| CD8+ T c | 0.006 | 14  | 34 | 2 | 0.059 | 0.14 | REAC:R-HSA-69166 | Removal of the Flap    | 10622 | 1879 | 0.017 |
| CD8+ T c | 0.006 | 120 | 34 | 4 | 0.118 | 0.03 | REAC:R-HSA-20240 | TCR signaling          | 10622 | 2207 | 0.017 |
| CD8+ T c | 0.006 | 60  | 34 | 3 | 0.088 | 0.05 | REAC:R-HSA-56077 | Dectin-1 mediated n    | 10622 | 424  | 0.017 |
| CD8+ T c | 0.006 | 55  | 34 | 3 | 0.088 | 0.05 | REAC:R-HSA-46412 | Degradation of AXIN    | 10622 | 665  | 0.017 |
| CD8+ T c | 0.006 | 51  | 34 | 3 | 0.088 | 0.06 | REAC:R-HSA-35056 | Regulation of ornithi  | 10622 | 1868 | 0.017 |
| CD8+ T c | 0.006 | 57  | 34 | 3 | 0.088 | 0.05 | REAC:R-HSA-46412 | Degradation of DVL     | 10622 | 666  | 0.017 |
| CD8+ T c | 0.006 | 60  | 34 | 3 | 0.088 | 0.05 | REAC:R-HSA-56107 | Degradation of GLI1    | 10622 | 668  | 0.017 |
| CD8+ T c | 0.006 | 54  | 34 | 3 | 0.088 | 0.06 | REAC:R-HSA-45040 | AUF1 (hnRNP D0) bir    | 10622 | 34   | 0.017 |
| CD8+ T c | 0.006 | 60  | 34 | 3 | 0.088 | 0.05 | REAC:R-HSA-56107 | Degradation of GLI2    | 10622 | 669  | 0.017 |
| CD8+ T c | 0.006 | 52  | 34 | 3 | 0.088 | 0.06 | REAC:R-HSA-69613 | p53-Independent G1     | 10622 | 2485 | 0.017 |
| CD8+ T c | 0.006 | 59  | 34 | 3 | 0.088 | 0.05 | REAC:R-HSA-53873 | Hh mutants abrogate    | 10622 | 1024 | 0.017 |
| CD8+ T c | 0.006 | 59  | 34 | 3 | 0.088 | 0.05 | REAC:R-HSA-68827 | CDT1 association wit   | 10622 | 255  | 0.017 |
| CD8+ T c | 0.006 | 58  | 34 | 3 | 0.088 | 0.05 | REAC:R-HSA-35120 | Metabolism of polya    | 10622 | 1309 | 0.017 |
| CD8+ T c | 0.006 | 14  | 34 | 2 | 0.059 | 0.14 | REAC:R-HSA-53586 | Mismatch repair (MM    | 10622 | 1334 | 0.017 |
| CD8+ T c | 0.006 | 53  | 34 | 3 | 0.088 | 0.06 | REAC:R-HSA-96043 | Negative regulation o  | 10622 | 1438 | 0.017 |



|          |       |     |    |   |       |      |                  |                        |       |      |       |
|----------|-------|-----|----|---|-------|------|------------------|------------------------|-------|------|-------|
| CD8+ T c | 0.006 | 125 | 34 | 4 | 0.118 | 0.03 | REAC:R-HSA-16290 | Host Interactions of H | 10622 | 1034 | 0.017 |
| CD8+ T c | 0.006 | 59  | 34 | 3 | 0.088 | 0.05 | REAC:R-HSA-56765 | NIK-->noncanonical     | 10622 | 1392 | 0.017 |
| CD8+ T c | 0.006 | 56  | 34 | 3 | 0.088 | 0.05 | REAC:R-HSA-53627 | Hh mutants are degr    | 10622 | 1025 | 0.017 |
| CD8+ T c | 0.006 | 138 | 34 | 4 | 0.118 | 0.03 | REAC:R-HSA-44665 | Interleukin-1 family s | 10622 | 1127 | 0.017 |
| CD8+ T c | 0.006 | 61  | 34 | 3 | 0.088 | 0.05 | REAC:R-HSA-56788 | Defective CFTR cause   | 10622 | 470  | 0.017 |
| CD8+ T c | 0.007 | 15  | 34 | 2 | 0.059 | 0.13 | REAC:R-HSA-53585 | Mismatch Repair        | 10622 | 1333 | 0.017 |
| CD8+ T c | 0.007 | 15  | 34 | 2 | 0.059 | 0.13 | REAC:R-HSA-69183 | Processive synthesis   | 10622 | 1653 | 0.017 |
| CD8+ T c | 0.007 | 63  | 34 | 3 | 0.088 | 0.05 | REAC:R-HSA-67822 | Gap-filling DNA repa   | 10622 | 947  | 0.017 |
| CD8+ T c | 0.007 | 64  | 34 | 3 | 0.088 | 0.05 | REAC:R-HSA-46088 | Asymmetric localizat   | 10622 | 173  | 0.017 |
| CD8+ T c | 0.007 | 64  | 34 | 3 | 0.088 | 0.05 | REAC:R-HSA-67821 | Dual incision in TC-N  | 10622 | 742  | 0.017 |
| CD8+ T c | 0.007 | 64  | 34 | 3 | 0.088 | 0.05 | REAC:R-HSA-17408 | Autodegradation of C   | 10622 | 178  | 0.017 |
| CD8+ T c | 0.007 | 16  | 34 | 2 | 0.059 | 0.13 | REAC:R-HSA-11031 | Translesion synthesis  | 10622 | 2352 | 0.017 |
| CD8+ T c | 0.007 | 66  | 34 | 3 | 0.088 | 0.05 | REAC:R-HSA-69580 | p53-Dependent G1/S     | 10622 | 2483 | 0.017 |
| CD8+ T c | 0.007 | 66  | 34 | 3 | 0.088 | 0.05 | REAC:R-HSA-69563 | p53-Dependent G1 U     | 10622 | 2482 | 0.017 |
| CD8+ T c | 0.007 | 65  | 34 | 3 | 0.088 | 0.05 | REAC:R-HSA-53583 | Hedgehog ligand bid    | 10622 | 1017 | 0.017 |
| CD8+ T c | 0.007 | 66  | 34 | 3 | 0.088 | 0.05 | REAC:R-HSA-12341 | Oxygen-dependent       | 10622 | 1510 | 0.017 |
| CD8+ T c | 0.007 | 68  | 34 | 3 | 0.088 | 0.04 | REAC:R-HSA-69615 | G1/S DNA Damage C      | 10622 | 913  | 0.017 |
| CD8+ T c | 0.007 | 17  | 34 | 2 | 0.059 | 0.12 | REAC:R-HSA-17443 | Removal of the Flap    | 10622 | 1880 | 0.017 |
| CD8+ T c | 0.007 | 67  | 34 | 3 | 0.088 | 0.04 | REAC:R-HSA-70171 | Glycolysis             | 10622 | 981  | 0.017 |
| CD8+ T c | 0.007 | 68  | 34 | 3 | 0.088 | 0.04 | REAC:R-HSA-68867 | Assembly of the pre-   | 10622 | 170  | 0.017 |
| CD8+ T c | 0.007 | 67  | 34 | 3 | 0.088 | 0.04 | REAC:R-HSA-56584 | Regulation of RAS by   | 10622 | 1832 | 0.017 |
| CD8+ T c | 0.007 | 67  | 34 | 3 | 0.088 | 0.04 | REAC:R-HSA-11690 | Activation of NF-kap   | 10622 | 81   | 0.017 |
| CD8+ T c | 0.007 | 17  | 34 | 2 | 0.059 | 0.12 | REAC:R-HSA-56561 | Translesion synthesis  | 10622 | 2350 | 0.017 |
| CD8+ T c | 0.007 | 17  | 34 | 2 | 0.059 | 0.12 | REAC:R-HSA-56558 | Translesion synthesis  | 10622 | 2351 | 0.017 |
| CD8+ T c | 0.007 | 69  | 34 | 3 | 0.088 | 0.04 | REAC:R-HSA-89487 | Regulation of PTEN s   | 10622 | 1831 | 0.017 |
| CD8+ T c | 0.007 | 264 | 34 | 5 | 0.147 | 0.02 | REAC:R-HSA-56730 | RAF/MAP kinase casc    | 10622 | 1690 | 0.017 |
| CD8+ T c | 0.008 | 18  | 34 | 2 | 0.059 | 0.11 | REAC:R-HSA-44635 | Cell-extracellular ma  | 10622 | 309  | 0.017 |
| CD8+ T c | 0.008 | 71  | 34 | 3 | 0.088 | 0.04 | REAC:R-HSA-68949 | Orc1 removal from c    | 10622 | 1499 | 0.017 |
| CD8+ T c | 0.008 | 71  | 34 | 3 | 0.088 | 0.04 | REAC:R-HSA-89399 | Regulation of RUNX2    | 10622 | 1834 | 0.017 |
| CD8+ T c | 0.008 | 269 | 34 | 5 | 0.147 | 0.02 | REAC:R-HSA-56849 | MAPK1/MAPK3 signa      | 10622 | 1237 | 0.017 |
| CD8+ T c | 0.008 | 74  | 34 | 3 | 0.088 | 0.04 | REAC:R-HSA-17941 | APC:Cdc20 mediated     | 10622 | 25   | 0.017 |
| CD8+ T c | 0.008 | 19  | 34 | 2 | 0.059 | 0.11 | REAC:R-HSA-11032 | Translesion Synthesis  | 10622 | 2349 | 0.017 |
| CD8+ T c | 0.008 | 73  | 34 | 3 | 0.088 | 0.04 | REAC:R-HSA-69017 | CDK-mediated phos      | 10622 | 254  | 0.017 |
| CD8+ T c | 0.008 | 407 | 34 | 6 | 0.176 | 0.01 | REAC:R-HSA-68886 | M Phase                | 10622 | 1230 | 0.017 |
| CD8+ T c | 0.008 | 73  | 34 | 3 | 0.088 | 0.04 | REAC:R-HSA-17418 | Cdc20:Phospho-APC      | 10622 | 298  | 0.017 |
| CD8+ T c | 0.008 | 19  | 34 | 2 | 0.059 | 0.11 | REAC:R-HSA-17441 | Processive synthesis   | 10622 | 1652 | 0.017 |
| CD8+ T c | 0.008 | 75  | 34 | 3 | 0.088 | 0.04 | REAC:R-HSA-12341 | Cellular response to   | 10622 | 314  | 0.018 |
| CD8+ T c | 0.008 | 20  | 34 | 2 | 0.059 | 0.1  | REAC:R-HSA-69186 | Lagging Strand Synt    | 10622 | 1195 | 0.018 |
| CD8+ T c | 0.009 | 77  | 34 | 3 | 0.088 | 0.04 | REAC:R-HSA-67818 | Transcription-Couple   | 10622 | 2323 | 0.018 |
| CD8+ T c | 0.009 | 77  | 34 | 3 | 0.088 | 0.04 | REAC:R-HSA-56190 | ABC transporter diso   | 10622 | 4    | 0.018 |
| CD8+ T c | 0.009 | 168 | 34 | 4 | 0.118 | 0.02 | REAC:R-HSA-69481 | G2/M Checkpoints       | 10622 | 917  | 0.018 |
| CD8+ T c | 0.009 | 21  | 34 | 2 | 0.059 | 0.1  | REAC:R-HSA-56518 | PCNA-Dependent Lc      | 10622 | 1513 | 0.019 |
| CD8+ T c | 0.009 | 80  | 34 | 3 | 0.088 | 0.04 | REAC:R-HSA-11683 | Downstream signalin    | 10622 | 730  | 0.019 |
| CD8+ T c | 0.009 | 81  | 34 | 3 | 0.088 | 0.04 | REAC:R-HSA-17640 | Regulation of APC/C    | 10622 | 1812 | 0.019 |
| CD8+ T c | 0.010 | 83  | 34 | 3 | 0.088 | 0.04 | REAC:R-HSA-12369 | ER-Phagosome path      | 10622 | 758  | 0.019 |
| CD8+ T c | 0.010 | 83  | 34 | 3 | 0.088 | 0.04 | REAC:R-HSA-19525 | Degradation of beta-   | 10622 | 670  | 0.019 |
| CD8+ T c | 0.010 | 83  | 34 | 3 | 0.088 | 0.04 | REAC:R-HSA-69202 | Cyclin E associated e  | 10622 | 389  | 0.019 |
| CD8+ T c | 0.010 | 178 | 34 | 4 | 0.118 | 0.02 | REAC:R-HSA-72163 | mRNA Splicing - Ma     | 10622 | 2472 | 0.019 |
| CD8+ T c | 0.010 | 84  | 34 | 3 | 0.088 | 0.04 | REAC:R-HSA-56963 | Global Genome Nucl     | 10622 | 954  | 0.019 |
| CD8+ T c | 0.010 | 23  | 34 | 2 | 0.059 | 0.09 | REAC:R-HSA-96376 | Response of Mtb to r   | 10622 | 1904 | 0.019 |
| CD8+ T c | 0.010 | 85  | 34 | 3 | 0.088 | 0.04 | REAC:R-HSA-70326 | Glucose metabolism     | 10622 | 960  | 0.019 |
| CD8+ T c | 0.010 | 85  | 34 | 3 | 0.088 | 0.04 | REAC:R-HSA-56326 | Hedgehog 'on' state    | 10622 | 1016 | 0.019 |
| CD8+ T c | 0.010 | 85  | 34 | 3 | 0.088 | 0.04 | REAC:R-HSA-69656 | Cyclin A:Cdk2-associ   | 10622 | 387  | 0.019 |
| CD8+ T c | 0.010 | 86  | 34 | 3 | 0.088 | 0.03 | REAC:R-HSA-45053 | Regulation of mRNA     | 10622 | 1865 | 0.019 |
| CD8+ T c | 0.011 | 25  | 34 | 2 | 0.059 | 0.08 | REAC:R-HSA-56963 | Gap-filling DNA repa   | 10622 | 946  | 0.019 |
| CD8+ T c | 0.011 | 186 | 34 | 4 | 0.118 | 0.02 | REAC:R-HSA-72172 | mRNA Splicing          | 10622 | 2471 | 0.019 |
| CD8+ T c | 0.011 | 25  | 34 | 2 | 0.059 | 0.08 | REAC:R-HSA-11037 | Resolution of AP site  | 10622 | 1893 | 0.019 |
| CD8+ T c | 0.011 | 89  | 34 | 3 | 0.088 | 0.03 | REAC:R-HSA-56871 | MAPK6/MAPK4 signa      | 10622 | 1239 | 0.019 |

|          |       |     |    |   |       |      |                  |                             |       |      |       |
|----------|-------|-----|----|---|-------|------|------------------|-----------------------------|-------|------|-------|
| CD8+ T c | 0.011 | 308 | 34 | 5 | 0.147 | 0.02 | REAC:R-HSA-56830 | MAPK family signalin        | 10622 | 1234 | 0.019 |
| CD8+ T c | 0.011 | 25  | 34 | 2 | 0.059 | 0.08 | REAC:R-HSA-68035 | FGFR2 alternative spl       | 10622 | 828  | 0.019 |
| CD8+ T c | 0.011 | 188 | 34 | 4 | 0.118 | 0.02 | REAC:R-HSA-24678 | Separation of Sister C      | 10622 | 2000 | 0.020 |
| CD8+ T c | 0.011 | 91  | 34 | 3 | 0.088 | 0.03 | REAC:R-HSA-69052 | Switching of origins t      | 10622 | 2148 | 0.020 |
| CD8+ T c | 0.011 | 459 | 34 | 6 | 0.176 | 0.01 | REAC:R-HSA-44914 | Signaling by Interleu       | 10622 | 2054 | 0.020 |
| CD8+ T c | 0.012 | 92  | 34 | 3 | 0.088 | 0.03 | REAC:R-HSA-40864 | PCP/CE pathway              | 10622 | 1514 | 0.020 |
| CD8+ T c | 0.012 | 94  | 34 | 3 | 0.088 | 0.03 | REAC:R-HSA-44200 | VEGFA-VEGFR2 Path           | 10622 | 2407 | 0.021 |
| CD8+ T c | 0.012 | 27  | 34 | 2 | 0.059 | 0.07 | REAC:R-HSA-96354 | Infection with Mycob        | 10622 | 1078 | 0.021 |
| CD8+ T c | 0.013 | 28  | 34 | 2 | 0.059 | 0.07 | REAC:R-HSA-56018 | PIWI-interacting RNA        | 10622 | 1540 | 0.022 |
| CD8+ T c | 0.013 | 97  | 34 | 3 | 0.088 | 0.03 | REAC:R-HSA-56077 | CLEC7A (Dectin-1) si        | 10622 | 258  | 0.022 |
| CD8+ T c | 0.014 | 99  | 34 | 3 | 0.088 | 0.03 | REAC:R-HSA-12369 | Antigen processing-(        | 10622 | 144  | 0.022 |
| CD8+ T c | 0.014 | 100 | 34 | 3 | 0.088 | 0.03 | REAC:R-HSA-56685 | TNFR2 non-canonical         | 10622 | 2230 | 0.023 |
| CD8+ T c | 0.014 | 486 | 34 | 6 | 0.176 | 0.01 | REAC:R-HSA-90069 | Signaling by Recepto        | 10622 | 2091 | 0.023 |
| CD8+ T c | 0.014 | 30  | 34 | 2 | 0.059 | 0.07 | REAC:R-HSA-11031 | Recognition of DNA          | 10622 | 1797 | 0.023 |
| CD8+ T c | 0.015 | 103 | 34 | 3 | 0.088 | 0.03 | REAC:R-HSA-38255 | ABC-family proteins         | 10622 | 6    | 0.023 |
| CD8+ T c | 0.015 | 104 | 34 | 3 | 0.088 | 0.03 | REAC:R-HSA-19413 | Signaling by VEGF           | 10622 | 2101 | 0.023 |
| CD8+ T c | 0.015 | 31  | 34 | 2 | 0.059 | 0.06 | REAC:R-HSA-44509 | Interaction between         | 10622 | 1115 | 0.023 |
| CD8+ T c | 0.015 | 32  | 34 | 2 | 0.059 | 0.06 | REAC:R-HSA-56264 | RHO GTPases activat         | 10622 | 1703 | 0.023 |
| CD8+ T c | 0.015 | 32  | 34 | 2 | 0.059 | 0.06 | REAC:R-HSA-41899 | Adherens junctions in       | 10622 | 115  | 0.023 |
| CD8+ T c | 0.015 | 32  | 34 | 2 | 0.059 | 0.06 | REAC:R-HSA-56561 | Termination of transl       | 10622 | 2272 | 0.023 |
| CD8+ T c | 0.015 | 32  | 34 | 2 | 0.059 | 0.06 | REAC:R-HSA-69190 | DNA strand elongatio        | 10622 | 417  | 0.023 |
| CD8+ T c | 0.017 | 34  | 34 | 2 | 0.059 | 0.06 | REAC:R-HSA-17441 | Telomere C-strand (l        | 10622 | 2266 | 0.026 |
| CD8+ T c | 0.018 | 112 | 34 | 3 | 0.088 | 0.03 | REAC:R-HSA-15757 | Telomere Maintenanc         | 10622 | 2269 | 0.026 |
| CD8+ T c | 0.018 | 113 | 34 | 3 | 0.088 | 0.03 | REAC:R-HSA-56107 | Hedgehog 'off' state        | 10622 | 1015 | 0.026 |
| CD8+ T c | 0.018 | 35  | 34 | 2 | 0.059 | 0.06 | REAC:R-HSA-56632 | RHO GTPases Activat         | 10622 | 1701 | 0.026 |
| CD8+ T c | 0.018 | 35  | 34 | 2 | 0.059 | 0.06 | REAC:R-HSA-68029 | Signaling by high-kir       | 10622 | 2109 | 0.026 |
| CD8+ T c | 0.018 | 696 | 34 | 7 | 0.206 | 0.01 | REAC:R-HSA-12802 | Cytokine Signaling in       | 10622 | 393  | 0.026 |
| CD8+ T c | 0.018 | 228 | 34 | 4 | 0.118 | 0.02 | REAC:R-HSA-68882 | Mitotic Anaphase            | 10622 | 1351 | 0.026 |
| CD8+ T c | 0.018 | 229 | 34 | 4 | 0.118 | 0.02 | REAC:R-HSA-25553 | Mitotic Metaphase a         | 10622 | 1354 | 0.026 |
| CD8+ T c | 0.018 | 36  | 34 | 2 | 0.059 | 0.06 | REAC:R-HSA-73933 | Resolution of Abasic        | 10622 | 1895 | 0.026 |
| CD8+ T c | 0.018 | 116 | 34 | 3 | 0.088 | 0.03 | REAC:R-HSA-20294 | Regulation of actin d       | 10622 | 1846 | 0.026 |
| CD8+ T c | 0.019 | 233 | 34 | 4 | 0.118 | 0.02 | REAC:R-HSA-15711 | Signaling by NOTCH          | 10622 | 2065 | 0.027 |
| CD8+ T c | 0.019 | 118 | 34 | 3 | 0.088 | 0.03 | REAC:R-HSA-88781 | Transcriptional regul       | 10622 | 2333 | 0.027 |
| CD8+ T c | 0.019 | 2   | 34 | 1 | 0.029 | 0.5  | REAC:R-HSA-19290 | vRNP Assembly               | 10622 | 2516 | 0.027 |
| CD8+ T c | 0.019 | 2   | 34 | 1 | 0.029 | 0.5  | REAC:R-HSA-96366 | Manipulation of host        | 10622 | 1272 | 0.027 |
| CD8+ T c | 0.020 | 38  | 34 | 2 | 0.059 | 0.05 | REAC:R-HSA-89505 | Gene and protein exp        | 10622 | 950  | 0.027 |
| CD8+ T c | 0.020 | 237 | 34 | 4 | 0.118 | 0.02 | REAC:R-HSA-72203 | Processing of Capped        | 10622 | 1647 | 0.027 |
| CD8+ T c | 0.020 | 39  | 34 | 2 | 0.059 | 0.05 | REAC:R-HSA-56741 | MAP2K and MAPK ac           | 10622 | 1232 | 0.027 |
| CD8+ T c | 0.020 | 39  | 34 | 2 | 0.059 | 0.05 | REAC:R-HSA-11031 | Translesion synthesis       | 10622 | 2353 | 0.027 |
| CD8+ T c | 0.021 | 40  | 34 | 2 | 0.059 | 0.05 | REAC:R-HSA-96562 | Signaling by RAF1 m         | 10622 | 2087 | 0.028 |
| CD8+ T c | 0.021 | 40  | 34 | 2 | 0.059 | 0.05 | REAC:R-HSA-39286 | EPHB-mediated forw          | 10622 | 755  | 0.028 |
| CD8+ T c | 0.021 | 549 | 34 | 6 | 0.176 | 0.01 | REAC:R-HSA-42247 | Axon guidance               | 10622 | 182  | 0.028 |
| CD8+ T c | 0.022 | 41  | 34 | 2 | 0.059 | 0.05 | REAC:R-HSA-56964 | Dual Incision in GG-N       | 10622 | 741  | 0.029 |
| CD8+ T c | 0.023 | 130 | 34 | 3 | 0.088 | 0.02 | REAC:R-HSA-89392 | RUNX1 regulates tran        | 10622 | 1771 | 0.031 |
| CD8+ T c | 0.025 | 45  | 34 | 2 | 0.059 | 0.04 | REAC:R-HSA-96499 | Signaling downstream        | 10622 | 2117 | 0.032 |
| CD8+ T c | 0.025 | 45  | 34 | 2 | 0.059 | 0.04 | REAC:R-HSA-68029 | Signaling by modera         | 10622 | 2113 | 0.032 |
| CD8+ T c | 0.025 | 45  | 34 | 2 | 0.059 | 0.04 | REAC:R-HSA-68029 | Signaling by RAS mu         | 10622 | 2088 | 0.032 |
| CD8+ T c | 0.025 | 574 | 34 | 6 | 0.176 | 0.01 | REAC:R-HSA-96751 | Nervous system deve         | 10622 | 1445 | 0.032 |
| CD8+ T c | 0.025 | 45  | 34 | 2 | 0.059 | 0.04 | REAC:R-HSA-68029 | Paradoxical activatio       | 10622 | 1568 | 0.032 |
| CD8+ T c | 0.025 | 136 | 34 | 3 | 0.088 | 0.02 | REAC:R-HSA-56214 | C-type lectin recepto       | 10622 | 243  | 0.032 |
| CD8+ T c | 0.025 | 136 | 34 | 3 | 0.088 | 0.02 | REAC:R-HSA-28718 | FCERI mediated NF- $\kappa$ | 10622 | 819  | 0.032 |
| CD8+ T c | 0.026 | 138 | 34 | 3 | 0.088 | 0.02 | REAC:R-HSA-68070 | PTEN Regulation             | 10622 | 1557 | 0.033 |
| CD8+ T c | 0.027 | 139 | 34 | 3 | 0.088 | 0.02 | REAC:R-HSA-73886 | Chromosome Mainte           | 10622 | 333  | 0.033 |
| CD8+ T c | 0.027 | 47  | 34 | 2 | 0.059 | 0.04 | REAC:R-HSA-90205 | Interleukin-12 signal       | 10622 | 1132 | 0.033 |
| CD8+ T c | 0.027 | 140 | 34 | 3 | 0.088 | 0.02 | REAC:R-HSA-20294 | Fcgamma receptor (F         | 10622 | 862  | 0.033 |
| CD8+ T c | 0.027 | 48  | 34 | 2 | 0.059 | 0.04 | REAC:R-HSA-43723 | Recycling pathway o         | 10622 | 1803 | 0.033 |
| CD8+ T c | 0.027 | 48  | 34 | 2 | 0.059 | 0.04 | REAC:R-HSA-73893 | DNA Damage Bypass           | 10622 | 406  | 0.033 |
| CD8+ T c | 0.028 | 49  | 34 | 2 | 0.059 | 0.04 | REAC:R-HSA-19082 | Gap junction trafficki      | 10622 | 944  | 0.034 |

|            |       |     |    |   |       |      |                  |                         |       |      |       |
|------------|-------|-----|----|---|-------|------|------------------|-------------------------|-------|------|-------|
| CD8+ T c   | 0.028 | 143 | 34 | 3 | 0.088 | 0.02 | REAC:R-HSA-38584 | Beta-catenin indepe     | 10622 | 201  | 0.034 |
| CD8+ T c   | 0.028 | 49  | 34 | 2 | 0.059 | 0.04 | REAC:R-HSA-39286 | EPH-ephrin mediate      | 10622 | 753  | 0.034 |
| CD8+ T c   | 0.029 | 50  | 34 | 2 | 0.059 | 0.04 | REAC:R-HSA-15785 | Gap junction trafficki  | 10622 | 945  | 0.034 |
| CD8+ T c   | 0.029 | 147 | 34 | 3 | 0.088 | 0.02 | REAC:R-HSA-16258 | HIV Life Cycle          | 10622 | 1006 | 0.034 |
| CD8+ T c   | 0.030 | 51  | 34 | 2 | 0.059 | 0.04 | REAC:R-HSA-18078 | Extension of Telomer    | 10622 | 811  | 0.034 |
| CD8+ T c   | 0.030 | 51  | 34 | 2 | 0.059 | 0.04 | REAC:R-HSA-75153 | Apoptotic execution     | 10622 | 153  | 0.034 |
| CD8+ T c   | 0.030 | 148 | 34 | 3 | 0.088 | 0.02 | REAC:R-HSA-90185 | Estrogen-dependent      | 10622 | 793  | 0.034 |
| CD8+ T c   | 0.030 | 149 | 34 | 3 | 0.088 | 0.02 | REAC:R-HSA-53583 | Signaling by Hedgeh     | 10622 | 2051 | 0.034 |
| CD8+ T c   | 0.031 | 4   | 34 | 1 | 0.029 | 0.25 | REAC:R-HSA-96652 | Resistance of ERBB2     | 10622 | 1888 | 0.034 |
| CD8+ T c   | 0.031 | 4   | 34 | 1 | 0.029 | 0.25 | REAC:R-HSA-96652 | Resistance of ERBB2     | 10622 | 1892 | 0.034 |
| CD8+ T c   | 0.031 | 4   | 34 | 1 | 0.029 | 0.25 | REAC:R-HSA-96652 | Resistance of ERBB2     | 10622 | 1891 | 0.034 |
| CD8+ T c   | 0.031 | 4   | 34 | 1 | 0.029 | 0.25 | REAC:R-HSA-96522 | Drug-mediated inhib     | 10622 | 740  | 0.034 |
| CD8+ T c   | 0.031 | 4   | 34 | 1 | 0.029 | 0.25 | REAC:R-HSA-96652 | Resistance of ERBB2     | 10622 | 1889 | 0.034 |
| CD8+ T c   | 0.031 | 4   | 34 | 1 | 0.029 | 0.25 | REAC:R-HSA-96652 | Drug resistance in ER   | 10622 | 735  | 0.034 |
| CD8+ T c   | 0.031 | 4   | 34 | 1 | 0.029 | 0.25 | REAC:R-HSA-96657 | Drug resistance in ER   | 10622 | 736  | 0.034 |
| CD8+ T c   | 0.031 | 4   | 34 | 1 | 0.029 | 0.25 | REAC:R-HSA-96652 | Resistance of ERBB2     | 10622 | 1885 | 0.034 |
| CD8+ T c   | 0.031 | 4   | 34 | 1 | 0.029 | 0.25 | REAC:R-HSA-96652 | Resistance of ERBB2     | 10622 | 1886 | 0.034 |
| CD8+ T c   | 0.031 | 4   | 34 | 1 | 0.029 | 0.25 | REAC:R-HSA-96652 | Resistance of ERBB2     | 10622 | 1887 | 0.034 |
| CD8+ T c   | 0.031 | 4   | 34 | 1 | 0.029 | 0.25 | REAC:R-HSA-96652 | Resistance of ERBB2     | 10622 | 1890 | 0.034 |
| CD8+ T c   | 0.032 | 290 | 34 | 4 | 0.118 | 0.01 | REAC:R-HSA-69620 | Cell Cycle Checkpoin    | 10622 | 300  | 0.035 |
| CD8+ T c   | 0.034 | 57  | 34 | 2 | 0.059 | 0.04 | REAC:R-HSA-44711 | Interleukin-12 family   | 10622 | 1131 | 0.037 |
| CD8+ T c   | 0.034 | 297 | 34 | 4 | 0.118 | 0.01 | REAC:R-HSA-56884 | Deubiquitination        | 10622 | 682  | 0.037 |
| CD8+ T c   | 0.035 | 163 | 34 | 3 | 0.088 | 0.02 | REAC:R-HSA-98370 | Signaling by the B Ce   | 10622 | 2116 | 0.038 |
| CD8+ T c   | 0.037 | 5   | 34 | 1 | 0.029 | 0.2  | REAC:R-HSA-90134 | RHOBTB2 GTPase cy       | 10622 | 1712 | 0.040 |
| CD8+ T c   | 0.037 | 167 | 34 | 3 | 0.088 | 0.02 | REAC:R-HSA-56935 | DNA Double-Strand       | 10622 | 411  | 0.040 |
| CD8+ T c   | 0.039 | 171 | 34 | 3 | 0.088 | 0.02 | REAC:R-HSA-90105 | Regulation of expres    | 10622 | 1853 | 0.042 |
| CD8+ T c   | 0.040 | 173 | 34 | 3 | 0.088 | 0.02 | REAC:R-HSA-56191 | Disorders of transme    | 10622 | 717  | 0.042 |
| CD8+ T c   | 0.040 | 64  | 34 | 2 | 0.059 | 0.03 | REAC:R-HSA-56547 | Signaling by FGFR2      | 10622 | 2036 | 0.042 |
| CD8+ T c   | 0.040 | 64  | 34 | 2 | 0.059 | 0.03 | REAC:R-HSA-42127 | Cell-cell junction org  | 10622 | 308  | 0.042 |
| CD8+ T c   | 0.040 | 64  | 34 | 2 | 0.059 | 0.03 | REAC:R-HSA-68029 | Signaling by BRAF ar    | 10622 | 2018 | 0.042 |
| CD8+ T c   | 0.043 | 6   | 34 | 1 | 0.029 | 0.17 | REAC:R-HSA-53364 | Uptake and function     | 10622 | 2402 | 0.044 |
| CD8+ T c   | 0.043 | 6   | 34 | 1 | 0.029 | 0.17 | REAC:R-HSA-30004 | Scavenging by Class     | 10622 | 1982 | 0.044 |
| CD8+ T c   | 0.043 | 67  | 34 | 2 | 0.059 | 0.03 | REAC:R-HSA-56859 | HDR through Homol       | 10622 | 1000 | 0.045 |
| CD8+ T c   | 0.044 | 68  | 34 | 2 | 0.059 | 0.03 | REAC:R-HSA-38025 | Loss of Nlp from mito   | 10622 | 1222 | 0.045 |
| CD8+ T c   | 0.044 | 68  | 34 | 2 | 0.059 | 0.03 | REAC:R-HSA-38028 | Loss of proteins requ   | 10622 | 1225 | 0.045 |
| CD8+ T c   | 0.044 | 182 | 34 | 3 | 0.088 | 0.02 | REAC:R-HSA-24542 | Fc epsilon receptor (I  | 10622 | 861  | 0.045 |
| CD8+ T c   | 0.047 | 71  | 34 | 2 | 0.059 | 0.03 | REAC:R-HSA-88545 | AURKA Activation by     | 10622 | 35   | 0.048 |
| CD8+ T c   | 0.048 | 7   | 34 | 1 | 0.029 | 0.14 | REAC:R-HSA-16484 | 2-LTR circle formatio   | 10622 | 1    | 0.048 |
| CD8+ T c   | 0.048 | 72  | 34 | 2 | 0.059 | 0.03 | REAC:R-HSA-14451 | Translocation of SLC    | 10622 | 2354 | 0.048 |
| CD8+ T c   | 0.005 | 8   | 2  | 1 | 0.5   | 0.13 | REAC:R-HSA-73942 | DNA Damage Revers       | 10622 | 408  | 0.010 |
| CD8+ T c   | 0.005 | 7   | 2  | 1 | 0.5   | 0.14 | REAC:R-HSA-73943 | Reversal of alkylation  | 10622 | 1914 | 0.010 |
| CD8+ T c   | 0.007 | 17  | 2  | 1 | 0.5   | 0.06 | REAC:R-HSA-45051 | Tristetraprolin (TTP, 2 | 10622 | 2383 | 0.010 |
| CD8+ T c   | 0.028 | 86  | 2  | 1 | 0.5   | 0.01 | REAC:R-HSA-45053 | Regulation of mRNA      | 10622 | 1865 | 0.028 |
| NK cells_C | 0.002 | 7   | 1  | 1 | 1     | 0.14 | REAC:R-HSA-73943 | Reversal of alkylation  | 10622 | 1914 | 0.002 |
| NK cells_C | 0.002 | 8   | 1  | 1 | 1     | 0.13 | REAC:R-HSA-73942 | DNA Damage Revers       | 10622 | 408  | 0.002 |
| Regulator  | 0.000 | 5   | 4  | 2 | 0.5   | 0.4  | REAC:R-HSA-90134 | RHOBTB2 GTPase cy       | 10622 | 1712 | 0.003 |
| Regulator  | 0.000 | 6   | 4  | 2 | 0.5   | 0.33 | REAC:R-HSA-53364 | Uptake and function     | 10622 | 2402 | 0.003 |
| Regulator  | 0.000 | 16  | 4  | 2 | 0.5   | 0.13 | REAC:R-HSA-39995 | Sema3A PAK depend       | 10622 | 1989 | 0.003 |
| Regulator  | 0.000 | 16  | 4  | 2 | 0.5   | 0.13 | REAC:R-HSA-97065 | RHOBTB GTPase Cyc       | 10622 | 1710 | 0.003 |
| Regulator  | 0.000 | 16  | 4  | 2 | 0.5   | 0.13 | REAC:R-HSA-90129 | RHO GTPase cycle        | 10622 | 1696 | 0.003 |
| Regulator  | 0.000 | 14  | 4  | 2 | 0.5   | 0.14 | REAC:R-HSA-33715 | Attenuation phase       | 10622 | 177  | 0.003 |
| Regulator  | 0.000 | 12  | 4  | 2 | 0.5   | 0.17 | REAC:R-HSA-33715 | HSF1 activation         | 10622 | 1012 | 0.003 |
| Regulator  | 0.000 | 22  | 4  | 2 | 0.5   | 0.09 | REAC:R-HSA-96138 | Chaperone Mediated      | 10622 | 321  | 0.004 |
| Regulator  | 0.000 | 24  | 4  | 2 | 0.5   | 0.08 | REAC:R-HSA-33715 | HSF1-dependent tra      | 10622 | 1013 | 0.004 |
| Regulator  | 0.000 | 25  | 4  | 2 | 0.5   | 0.08 | REAC:R-HSA-53395 | Uptake and actions c    | 10622 | 2400 | 0.004 |
| Regulator  | 0.002 | 57  | 4  | 2 | 0.5   | 0.04 | REAC:R-HSA-33714 | HSP90 chaperone cy      | 10622 | 1014 | 0.015 |
| Regulator  | 0.002 | 64  | 4  | 2 | 0.5   | 0.03 | REAC:R-HSA-37375 | Semaphorin interacti    | 10622 | 1993 | 0.015 |
| Regulator  | 0.003 | 476 | 4  | 3 | 0.75  | 0.01 | REAC:R-HSA-67986 | Neutrophil degranula    | 10622 | 1458 | 0.015 |

|           |       |     |   |   |      |      |                  |                        |       |      |       |
|-----------|-------|-----|---|---|------|------|------------------|------------------------|-------|------|-------|
| Regulator | 0.003 | 79  | 4 | 2 | 0.5  | 0.03 | REAC:R-HSA-96791 | Potential therapeutic  | 10622 | 1634 | 0.015 |
| Regulator | 0.003 | 79  | 4 | 2 | 0.5  | 0.03 | REAC:R-HSA-88522 | The role of GTSE1 in   | 10622 | 2285 | 0.015 |
| Regulator | 0.003 | 87  | 4 | 2 | 0.5  | 0.02 | REAC:R-HSA-33715 | Cellular response to   | 10622 | 313  | 0.015 |
| Regulator | 0.005 | 116 | 4 | 2 | 0.5  | 0.02 | REAC:R-HSA-20294 | Regulation of actin d  | 10622 | 1846 | 0.015 |
| Regulator | 0.005 | 2   | 4 | 1 | 0.25 | 0.5  | REAC:R-HSA-19290 | vRNP Assembly          | 10622 | 2516 | 0.015 |
| Regulator | 0.005 | 4   | 4 | 1 | 0.25 | 0.25 | REAC:R-HSA-96652 | Resistance of ERBB2    | 10622 | 1892 | 0.015 |
| Regulator | 0.005 | 4   | 4 | 1 | 0.25 | 0.25 | REAC:R-HSA-96652 | Resistance of ERBB2    | 10622 | 1888 | 0.015 |
| Regulator | 0.005 | 4   | 4 | 1 | 0.25 | 0.25 | REAC:R-HSA-96652 | Resistance of ERBB2    | 10622 | 1891 | 0.015 |
| Regulator | 0.005 | 4   | 4 | 1 | 0.25 | 0.25 | REAC:R-HSA-96652 | Resistance of ERBB2    | 10622 | 1889 | 0.015 |
| Regulator | 0.005 | 4   | 4 | 1 | 0.25 | 0.25 | REAC:R-HSA-96652 | Resistance of ERBB2    | 10622 | 1887 | 0.015 |
| Regulator | 0.005 | 148 | 4 | 2 | 0.5  | 0.01 | REAC:R-HSA-90185 | Estrogen-dependent     | 10622 | 793  | 0.015 |
| Regulator | 0.005 | 4   | 4 | 1 | 0.25 | 0.25 | REAC:R-HSA-96652 | Resistance of ERBB2    | 10622 | 1890 | 0.015 |
| Regulator | 0.005 | 140 | 4 | 2 | 0.5  | 0.01 | REAC:R-HSA-20294 | Fcgamma receptor (F    | 10622 | 862  | 0.015 |
| Regulator | 0.005 | 4   | 4 | 1 | 0.25 | 0.25 | REAC:R-HSA-96652 | Resistance of ERBB2    | 10622 | 1886 | 0.015 |
| Regulator | 0.005 | 4   | 4 | 1 | 0.25 | 0.25 | REAC:R-HSA-96657 | Drug resistance in ER  | 10622 | 736  | 0.015 |
| Regulator | 0.005 | 4   | 4 | 1 | 0.25 | 0.25 | REAC:R-HSA-96522 | Drug-mediated inhibi   | 10622 | 740  | 0.015 |
| Regulator | 0.005 | 144 | 4 | 2 | 0.5  | 0.01 | REAC:R-HSA-96795 | SARS-CoV Infections    | 10622 | 1928 | 0.015 |
| Regulator | 0.005 | 4   | 4 | 1 | 0.25 | 0.25 | REAC:R-HSA-96652 | Resistance of ERBB2    | 10622 | 1885 | 0.015 |
| Regulator | 0.005 | 4   | 4 | 1 | 0.25 | 0.25 | REAC:R-HSA-96652 | Drug resistance in ER  | 10622 | 735  | 0.015 |
| Regulator | 0.007 | 196 | 4 | 2 | 0.5  | 0.01 | REAC:R-HSA-69275 | G2/M Transition        | 10622 | 920  | 0.018 |
| Regulator | 0.007 | 198 | 4 | 2 | 0.5  | 0.01 | REAC:R-HSA-45327 | Mitotic G2-G2/M ph     | 10622 | 1353 | 0.018 |
| Regulator | 0.007 | 6   | 4 | 1 | 0.25 | 0.17 | REAC:R-HSA-30004 | Scavenging by Class    | 10622 | 1982 | 0.019 |
| Regulator | 0.008 | 217 | 4 | 2 | 0.5  | 0.01 | REAC:R-HSA-89392 | ESR-mediated signal    | 10622 | 764  | 0.020 |
| Regulator | 0.009 | 8   | 4 | 1 | 0.25 | 0.13 | REAC:R-HSA-89371 | Aryl hydrocarbon rec   | 10622 | 159  | 0.023 |
| Regulator | 0.010 | 9   | 4 | 1 | 0.25 | 0.11 | REAC:R-HSA-96342 | Constitutive Signaling | 10622 | 375  | 0.025 |
| Regulator | 0.011 | 10  | 4 | 1 | 0.25 | 0.1  | REAC:R-HSA-14741 | Tetrahydrobiopterin    | 10622 | 2273 | 0.026 |
| Regulator | 0.012 | ### | 4 | 3 | 0.75 | 0    | REAC:R-HSA-16824 | Innate Immune System   | 10622 | 1100 | 0.026 |
| Regulator | 0.012 | 11  | 4 | 1 | 0.25 | 0.09 | REAC:R-HSA-20361 | eNOS activation        | 10622 | 2462 | 0.026 |
| Regulator | 0.012 | 291 | 4 | 2 | 0.5  | 0.01 | REAC:R-HSA-90069 | Signaling by Nuclear   | 10622 | 2080 | 0.026 |
| Regulator | 0.013 | 13  | 4 | 1 | 0.25 | 0.08 | REAC:R-HSA-56378 | Signaling by EGFRvIII  | 10622 | 2023 | 0.027 |
| Regulator | 0.013 | 13  | 4 | 1 | 0.25 | 0.08 | REAC:R-HSA-56378 | Constitutive Signaling | 10622 | 369  | 0.027 |
| Regulator | 0.014 | 14  | 4 | 1 | 0.25 | 0.07 | REAC:R-HSA-96653 | Signaling by ERBB2 E   | 10622 | 2025 | 0.027 |
| Regulator | 0.014 | 15  | 4 | 1 | 0.25 | 0.07 | REAC:R-HSA-84445 | The NLRP3 inflamma     | 10622 | 2277 | 0.027 |
| Regulator | 0.014 | 15  | 4 | 1 | 0.25 | 0.07 | REAC:R-HSA-20213 | Metabolism of nitric   | 10622 | 1306 | 0.027 |
| Regulator | 0.015 | 17  | 4 | 1 | 0.25 | 0.06 | REAC:R-HSA-56378 | Signaling by Ligand-   | 10622 | 2058 | 0.027 |
| Regulator | 0.015 | 17  | 4 | 1 | 0.25 | 0.06 | REAC:R-HSA-12363 | Constitutive Signaling | 10622 | 370  | 0.027 |
| Regulator | 0.016 | 18  | 4 | 1 | 0.25 | 0.06 | REAC:R-HSA-96656 | Signaling by ERBB2 T   | 10622 | 2027 | 0.027 |
| Regulator | 0.016 | 19  | 4 | 1 | 0.25 | 0.05 | REAC:R-HSA-89789 | Metabolism of cofact   | 10622 | 1299 | 0.027 |
| Regulator | 0.017 | 20  | 4 | 1 | 0.25 | 0.05 | REAC:R-HSA-62231 | Inflammasomes          | 10622 | 1080 | 0.027 |
| Regulator | 0.017 | 21  | 4 | 1 | 0.25 | 0.05 | REAC:R-HSA-96645 | Signaling by ERBB2 K   | 10622 | 2026 | 0.027 |
| Regulator | 0.018 | 22  | 4 | 1 | 0.25 | 0.05 | REAC:R-HSA-12279 | Signaling by ERBB2 in  | 10622 | 2028 | 0.027 |
| Regulator | 0.018 | 23  | 4 | 1 | 0.25 | 0.04 | REAC:R-HSA-16437 | Signaling by EGFR in   | 10622 | 2022 | 0.027 |
| Regulator | 0.019 | 24  | 4 | 1 | 0.25 | 0.04 | REAC:R-HSA-96608 | Purinergic signaling i | 10622 | 1674 | 0.027 |
| Regulator | 0.019 | 24  | 4 | 1 | 0.25 | 0.04 | REAC:R-HSA-96644 | Cell recruitment (pro  | 10622 | 304  | 0.027 |
| Regulator | 0.019 | 27  | 4 | 1 | 0.25 | 0.04 | REAC:R-HSA-52189 | VEGFR2 mediated va     | 10622 | 2409 | 0.027 |
| Regulator | 0.019 | 27  | 4 | 1 | 0.25 | 0.04 | REAC:R-HSA-88637 | Downregulation of E    | 10622 | 723  | 0.027 |
| Regulator | 0.019 | 28  | 4 | 1 | 0.25 | 0.04 | REAC:R-HSA-52188 | Regulated Necrosis     | 10622 | 1808 | 0.027 |
| Regulator | 0.019 | 28  | 4 | 1 | 0.25 | 0.04 | REAC:R-HSA-56754 | Regulation of necrop   | 10622 | 1867 | 0.027 |
| Regulator | 0.019 | 459 | 4 | 2 | 0.5  | 0    | REAC:R-HSA-97165 | Signaling by Rho GTP   | 10622 | 2094 | 0.027 |
| Regulator | 0.019 | 28  | 4 | 1 | 0.25 | 0.04 | REAC:R-HSA-52134 | RIPK1-mediated regu    | 10622 | 1726 | 0.027 |
| Regulator | 0.019 | 459 | 4 | 2 | 0.5  | 0    | REAC:R-HSA-44914 | Signaling by Interleu  | 10622 | 2054 | 0.027 |
| Regulator | 0.019 | 459 | 4 | 2 | 0.5  | 0    | REAC:R-HSA-19431 | Signaling by Rho GTP   | 10622 | 2093 | 0.027 |
| Regulator | 0.019 | 28  | 4 | 1 | 0.25 | 0.04 | REAC:R-HSA-56018 | PIWI-interacting RNA   | 10622 | 1540 | 0.027 |
| Regulator | 0.025 | 38  | 4 | 1 | 0.25 | 0.03 | REAC:R-HSA-89505 | Gene and protein exp   | 10622 | 950  | 0.035 |
| Regulator | 0.026 | 549 | 4 | 2 | 0.5  | 0    | REAC:R-HSA-42247 | Axon guidance          | 10622 | 182  | 0.035 |
| Regulator | 0.026 | 549 | 4 | 2 | 0.5  | 0    | REAC:R-HSA-69278 | Cell Cycle, Mitotic    | 10622 | 301  | 0.035 |
| Regulator | 0.028 | 574 | 4 | 2 | 0.5  | 0    | REAC:R-HSA-96751 | Nervous system deve    | 10622 | 1445 | 0.035 |
| Regulator | 0.028 | 44  | 4 | 1 | 0.25 | 0.02 | REAC:R-HSA-96463 | Aggrephagy             | 10622 | 121  | 0.035 |

|           |       |     |   |   |      |      |                  |                       |       |      |       |
|-----------|-------|-----|---|---|------|------|------------------|-----------------------|-------|------|-------|
| Regulator | 0.028 | 582 | 4 | 2 | 0.5  | 0    | REAC:R-HSA-22627 | Cellular responses to | 10622 | 317  | 0.035 |
| Regulator | 0.028 | 47  | 4 | 1 | 0.25 | 0.02 | REAC:R-HSA-90205 | Interleukin-12 signal | 10622 | 1132 | 0.035 |
| Regulator | 0.028 | 46  | 4 | 1 | 0.25 | 0.02 | REAC:R-HSA-12279 | Signaling by ERBB2    | 10622 | 2024 | 0.035 |
| Regulator | 0.032 | 55  | 4 | 1 | 0.25 | 0.02 | REAC:R-HSA-16864 | Nucleotide-binding c  | 10622 | 1485 | 0.040 |
| Regulator | 0.033 | 57  | 4 | 1 | 0.25 | 0.02 | REAC:R-HSA-44711 | Interleukin-12 family | 10622 | 1131 | 0.040 |
| Regulator | 0.035 | 696 | 4 | 2 | 0.5  | 0    | REAC:R-HSA-12802 | Cytokine Signaling in | 10622 | 393  | 0.042 |
| Regulator | 0.037 | 68  | 4 | 1 | 0.25 | 0.01 | REAC:R-HSA-38028 | Loss of proteins requ | 10622 | 1225 | 0.043 |
| Regulator | 0.037 | 68  | 4 | 1 | 0.25 | 0.01 | REAC:R-HSA-38025 | Loss of Nlp from mito | 10622 | 1222 | 0.043 |
| Regulator | 0.038 | 71  | 4 | 1 | 0.25 | 0.01 | REAC:R-HSA-88545 | AURKA Activation by   | 10622 | 35   | 0.044 |
| Regulator | 0.039 | 73  | 4 | 1 | 0.25 | 0.01 | REAC:R-HSA-90093 | Extra-nuclear estroge | 10622 | 812  | 0.044 |
| Regulator | 0.041 | 80  | 4 | 1 | 0.25 | 0.01 | REAC:R-HSA-38027 | Recruitment of mitot  | 10622 | 1800 | 0.045 |
| Regulator | 0.041 | 80  | 4 | 1 | 0.25 | 0.01 | REAC:R-HSA-38028 | Centrosome maturat    | 10622 | 318  | 0.045 |
| Regulator | 0.041 | 80  | 4 | 1 | 0.25 | 0.01 | REAC:R-HSA-96638 | Selective autophagy   | 10622 | 1986 | 0.045 |
| Regulator | 0.043 | 85  | 4 | 1 | 0.25 | 0.01 | REAC:R-HSA-25659 | Regulation of PLK1 A  | 10622 | 1827 | 0.047 |
| Regulator | 0.047 | 94  | 4 | 1 | 0.25 | 0.01 | REAC:R-HSA-44200 | VEGFA-VEGFR2 Path     | 10622 | 2407 | 0.049 |
| Regulator | 0.047 | 94  | 4 | 1 | 0.25 | 0.01 | REAC:R-HSA-38032 | Recruitment of NuM    | 10622 | 1799 | 0.049 |
| Regulator | 0.047 | 96  | 4 | 1 | 0.25 | 0.01 | REAC:R-HSA-56209 | Anchoring of the bas  | 10622 | 138  | 0.049 |
| Regulator | 0.047 | 97  | 4 | 1 | 0.25 | 0.01 | REAC:R-HSA-21737 | Binding and Uptake c  | 10622 | 207  | 0.049 |
| Regulator | 0.050 | 105 | 4 | 1 | 0.25 | 0.01 | REAC:R-HSA-21194 | Phase I - Functionali | 10622 | 1589 | 0.050 |
| Regulator | 0.050 | 104 | 4 | 1 | 0.25 | 0.01 | REAC:R-HSA-19413 | Signaling by VEGF     | 10622 | 2101 | 0.050 |
| Regulator | 0.050 | 909 | 4 | 2 | 0.5  | 0    | REAC:R-HSA-56632 | Infectious disease    | 10622 | 1079 | 0.050 |
| Regulator | 0.005 | 8   | 2 | 1 | 0.5  | 0.13 | REAC:R-HSA-73942 | DNA Damage Revers     | 10622 | 408  | 0.007 |
| Regulator | 0.005 | 8   | 2 | 1 | 0.5  | 0.13 | REAC:R-HSA-45052 | HuR (ELAVL1) binds    | 10622 | 1035 | 0.007 |
| Regulator | 0.005 | 7   | 2 | 1 | 0.5  | 0.14 | REAC:R-HSA-73943 | Reversal of alkylatio | 10622 | 1914 | 0.007 |
| Regulator | 0.040 | 86  | 2 | 1 | 0.5  | 0.01 | REAC:R-HSA-45053 | Regulation of mRNA    | 10622 | 1865 | 0.040 |
| CD4+ T c  | 0.002 | 8   | 1 | 1 | 1    | 0.13 | REAC:R-HSA-73942 | DNA Damage Revers     | 10622 | 408  | 0.002 |
| CD4+ T c  | 0.002 | 7   | 1 | 1 | 1    | 0.14 | REAC:R-HSA-73943 | Reversal of alkylatio | 10622 | 1914 | 0.002 |

**TableS6:OS of m6A-related Cell types In the Bulk sequences**

| m6A Sub                   | Dataset   | Hazard | low   | up   | P.value | n   |
|---------------------------|-----------|--------|-------|------|---------|-----|
| ALKBH5+CD8+ T cells-C4    | GSE103479 | 0.887  | 0.574 | 1.37 | 0.591   | 153 |
| B cells                   | GSE103479 | 0.54   | 0.273 | 1.07 | 0.077   | 155 |
| CD8+ T cells              | GSE103479 | 1.541  | 0.909 | 2.61 | 0.109   | 155 |
| Fibroblast                | GSE103479 | 0.483  | 0.175 | 1.33 | 0.161   | 155 |
| HNRNPA2B1+B-C1            | GSE103479 | 0.697  | 0.427 | 1.14 | 0.148   | 153 |
| HNRNPA2B1+CAF-C1          | GSE103479 | 0.74   | 0.533 | 1.03 | 0.071   | 153 |
| HNRNPA2B1+CD8+ T cells-C1 | GSE103479 | 0.961  | 0.605 | 1.53 | 0.865   | 153 |
| HNRNPA2B1+mac-C3          | GSE103479 | 0.908  | 0.626 | 1.32 | 0.611   | 153 |
| HNRNPA2B1+Reg T cells-C1  | GSE103479 | 1.299  | 0.83  | 2.03 | 0.252   | 153 |
| HNRNPC+CAF-C3             | GSE103479 | 0.698  | 0.467 | 1.04 | 0.079   | 153 |
| Macrophage                | GSE103479 | 0.58   | 0.307 | 1.1  | 0.093   | 155 |
| NoneMethy+B-C4            | GSE103479 | 0.991  | 0.632 | 1.56 | 0.970   | 153 |
| NoneMethy-CAF-C4          | GSE103479 | 0.909  | 0.601 | 1.37 | 0.650   | 153 |
| WTAP+B-C2                 | GSE103479 | 0.713  | 0.478 | 1.06 | 0.098   | 153 |
| WTAP+CAF-C2               | GSE103479 | 0.79   | 0.527 | 1.18 | 0.253   | 153 |
| WTAP+mac-C1               | GSE103479 | 0.711  | 0.507 | 1    | 0.048   | 153 |
| YTHDC1 &YTHDF3+mac_C4     | GSE103479 | 0.718  | 0.468 | 1.1  | 0.129   | 153 |
| YTHDF2+Reg T cells-C4     | GSE103479 | 0.885  | 0.591 | 1.33 | 0.553   | 153 |
| Regulatory T cells        | GSE103479 | 0.71   | 0.427 | 1.18 | 0.188   | 155 |
| ALKBH5+CD8+ T cells-C4    | GSE17538  | 1.558  | 0.988 | 2.46 | 0.057   | 200 |
| B cells                   | GSE17538  | 0.736  | 0.47  | 1.15 | 0.181   | 232 |
| CD8+ T cells              | GSE17538  | 0.743  | 0.494 | 1.12 | 0.156   | 232 |
| Fibroblast                | GSE17538  | 1.918  | 1.275 | 2.88 | 0.002   | 232 |
| HNRNPA2B1+B-C1            | GSE17538  | 0.693  | 0.459 | 1.05 | 0.081   | 200 |
| HNRNPA2B1+CAF-C1          | GSE17538  | 1.458  | 1.077 | 1.97 | 0.015   | 200 |
| HNRNPA2B1+CD8+ T cells-C1 | GSE17538  | 0.983  | 0.702 | 1.38 | 0.920   | 200 |
| HNRNPA2B1+mac-C3          | GSE17538  | 1.483  | 1.089 | 2.02 | 0.012   | 200 |
| HNRNPA2B1+Reg T cells-C1  | GSE17538  | 1.334  | 0.919 | 1.94 | 0.129   | 200 |
| HNRNPC+CAF-C3             | GSE17538  | 1.206  | 0.795 | 1.83 | 0.379   | 200 |
| Macrophage                | GSE17538  | 1.844  | 0.956 | 3.56 | 0.068   | 232 |
| NoneMethy+B-C4            | GSE17538  | 1.437  | 0.902 | 2.29 | 0.127   | 200 |
| NoneMethy-CAF-C4          | GSE17538  | 1.916  | 1.311 | 2.8  | 0.001   | 200 |
| WTAP+B-C2                 | GSE17538  | 0.986  | 0.594 | 1.64 | 0.958   | 200 |
| WTAP+CAF-C2               | GSE17538  | 1.555  | 1.122 | 2.16 | 0.008   | 200 |
| WTAP+mac-C1               | GSE17538  | 1.443  | 1.062 | 1.96 | 0.019   | 200 |
| YTHDC1 &YTHDF3+mac_C4     | GSE17538  | 1.739  | 1.158 | 2.61 | 0.008   | 200 |
| YTHDF2+Reg T cells-C4     | GSE17538  | 1.071  | 0.694 | 1.65 | 0.758   | 200 |
| Regulatory T cells        | GSE17538  | 0.724  | 0.48  | 1.09 | 0.123   | 232 |
| ALKBH5+CD8+ T cells-C4    | GSE38832  | 1.013  | 0.584 | 1.76 | 0.964   | 122 |
| B cells                   | GSE38832  | 0.396  | 0.179 | 0.88 | 0.022   | 122 |
| CD8+ T cells              | GSE38832  | 0.111  | 0.015 | 0.82 | 0.031   | 122 |
| Fibroblast                | GSE38832  | 1.707  | 0.771 | 3.78 | 0.187   | 122 |
| HNRNPA2B1+B-C1            | GSE38832  | 0.313  | 0.174 | 0.56 | 0.000   | 122 |
| HNRNPA2B1+CAF-C1          | GSE38832  | 1.417  | 0.905 | 2.22 | 0.128   | 122 |
| HNRNPA2B1+CD8+ T cells-C1 | GSE38832  | 0.394  | 0.199 | 0.78 | 0.008   | 122 |
| HNRNPA2B1+mac-C3          | GSE38832  | 0.935  | 0.558 | 1.57 | 0.798   | 122 |
| HNRNPA2B1+Reg T cells-C1  | GSE38832  | 0.773  | 0.466 | 1.28 | 0.318   | 122 |
| HNRNPC+CAF-C3             | GSE38832  | 1.019  | 0.508 | 2.04 | 0.957   | 122 |
| Macrophage                | GSE38832  | 0.141  | 0.019 | 1.04 | 0.054   | 122 |
| NoneMethy+B-C4            | GSE38832  | 0.942  | 0.578 | 1.54 | 0.811   | 122 |
| NoneMethy-CAF-C4          | GSE38832  | 1.766  | 1.022 | 3.05 | 0.042   | 122 |
| WTAP+B-C2                 | GSE38832  | 0.425  | 0.224 | 0.81 | 0.009   | 122 |
| WTAP+CAF-C2               | GSE38832  | 1.427  | 0.884 | 2.31 | 0.146   | 122 |

|                           |          |       |       |      |       |     |
|---------------------------|----------|-------|-------|------|-------|-----|
| WTAP+mac-C1               | GSE38832 | 0.907 | 0.55  | 1.5  | 0.702 | 122 |
| YTHDC1 &YTHDF3+mac_C4     | GSE38832 | 0.87  | 0.502 | 1.51 | 0.619 | 122 |
| YTHDF2+Reg T cells-C4     | GSE38832 | 0.531 | 0.289 | 0.98 | 0.041 | 122 |
| Regulatory T cells        | GSE38832 | 0.48  | 0.225 | 1.03 | 0.058 | 122 |
| ALKBH5+CD8+ T cells-C4    | GSE39582 | 1.251 | 0.974 | 1.61 | 0.080 | 557 |
| B cells                   | GSE39582 | 0.779 | 0.582 | 1.04 | 0.093 | 562 |
| CD8+ T cells              | GSE39582 | 0.783 | 0.589 | 1.04 | 0.091 | 562 |
| Fibroblast                | GSE39582 | 1.739 | 1.234 | 2.45 | 0.002 | 562 |
| HNRNPA2B1+B-C1            | GSE39582 | 0.693 | 0.541 | 0.89 | 0.004 | 557 |
| HNRNPA2B1+CAF-C1          | GSE39582 | 1.35  | 1.111 | 1.64 | 0.003 | 557 |
| HNRNPA2B1+CD8+ T cells-C1 | GSE39582 | 0.787 | 0.649 | 0.96 | 0.015 | 557 |
| HNRNPA2B1+mac-C3          | GSE39582 | 1.103 | 0.899 | 1.35 | 0.346 | 557 |
| HNRNPA2B1+Reg T cells-C1  | GSE39582 | 0.852 | 0.666 | 1.09 | 0.200 | 557 |
| HNRNPC+CAF-C3             | GSE39582 | 1.17  | 0.878 | 1.56 | 0.285 | 557 |
| Macrophage                | GSE39582 | 1.426 | 1.04  | 1.96 | 0.027 | 562 |
| NoneMethy+B-C4            | GSE39582 | 1.144 | 0.918 | 1.43 | 0.232 | 557 |
| NoneMethy-CAF-C4          | GSE39582 | 1.519 | 1.165 | 1.98 | 0.002 | 557 |
| WTAP+B-C2                 | GSE39582 | 1.113 | 0.879 | 1.41 | 0.374 | 557 |
| WTAP+CAF-C2               | GSE39582 | 1.295 | 1.07  | 1.57 | 0.008 | 557 |
| WTAP+mac-C1               | GSE39582 | 1.049 | 0.876 | 1.26 | 0.604 | 557 |
| YTHDC1 &YTHDF3+mac_C4     | GSE39582 | 1.141 | 0.925 | 1.41 | 0.217 | 557 |
| YTHDF2+Reg T cells-C4     | GSE39582 | 1.135 | 0.881 | 1.46 | 0.327 | 557 |
| Regulatory T cells        | GSE39582 | 0.582 | 0.398 | 0.85 | 0.005 | 562 |
| ALKBH5+CD8+ T cells-C4    | GSE41258 | 1.298 | 0.78  | 2.16 | 0.316 | 152 |
| B cells                   | GSE41258 | 0.615 | 0.392 | 0.97 | 0.035 | 152 |
| CD8+ T cells              | GSE41258 | 0.468 | 0.266 | 0.83 | 0.009 | 152 |
| Fibroblast                | GSE41258 | 2.444 | 1.346 | 4.44 | 0.003 | 152 |
| HNRNPA2B1+B-C1            | GSE41258 | 1.031 | 0.703 | 1.51 | 0.877 | 152 |
| HNRNPA2B1+CAF-C1          | GSE41258 | 1.142 | 0.848 | 1.54 | 0.382 | 152 |
| HNRNPA2B1+CD8+ T cells-C1 | GSE41258 | 0.74  | 0.526 | 1.04 | 0.085 | 152 |
| HNRNPA2B1+mac-C3          | GSE41258 | 0.901 | 0.607 | 1.34 | 0.604 | 152 |
| HNRNPA2B1+Reg T cells-C1  | GSE41258 | 0.772 | 0.51  | 1.17 | 0.222 | 152 |
| HNRNPC+CAF-C3             | GSE41258 | 0.87  | 0.587 | 1.29 | 0.487 | 152 |
| Macrophage                | GSE41258 | 0.691 | 0.422 | 1.13 | 0.143 | 152 |
| NoneMethy+B-C4            | GSE41258 | 1.246 | 0.928 | 1.67 | 0.143 | 152 |
| NoneMethy-CAF-C4          | GSE41258 | 1.461 | 0.967 | 2.21 | 0.072 | 152 |
| WTAP+B-C2                 | GSE41258 | 1.283 | 0.898 | 1.83 | 0.171 | 152 |
| WTAP+CAF-C2               | GSE41258 | 1.344 | 0.932 | 1.94 | 0.114 | 152 |
| WTAP+mac-C1               | GSE41258 | 0.891 | 0.633 | 1.25 | 0.508 | 152 |
| YTHDC1 &YTHDF3+mac_C4     | GSE41258 | 0.8   | 0.53  | 1.21 | 0.287 | 152 |
| YTHDF2+Reg T cells-C4     | GSE41258 | 1.431 | 0.897 | 2.28 | 0.132 | 152 |
| Regulatory T cells        | GSE41258 | 0.604 | 0.392 | 0.93 | 0.022 | 152 |
| ALKBH5+CD8+ T cells-C4    | GSE72970 | 0.695 | 0.506 | 0.95 | 0.024 | 124 |
| B cells                   | GSE72970 | 0.588 | 0.32  | 1.08 | 0.087 | 124 |
| CD8+ T cells              | GSE72970 | 0.685 | 0.454 | 1.04 | 0.072 | 124 |
| Fibroblast                | GSE72970 | 0.384 | 0.185 | 0.8  | 0.011 | 124 |
| HNRNPA2B1+B-C1            | GSE72970 | 0.852 | 0.584 | 1.24 | 0.407 | 124 |
| HNRNPA2B1+CAF-C1          | GSE72970 | 0.691 | 0.495 | 0.97 | 0.030 | 124 |
| HNRNPA2B1+CD8+ T cells-C1 | GSE72970 | 0.792 | 0.621 | 1.01 | 0.061 | 124 |
| HNRNPA2B1+mac-C3          | GSE72970 | 0.708 | 0.53  | 0.95 | 0.020 | 124 |
| HNRNPA2B1+Reg T cells-C1  | GSE72970 | 0.762 | 0.601 | 0.97 | 0.024 | 124 |
| HNRNPC+CAF-C3             | GSE72970 | 0.698 | 0.45  | 1.08 | 0.109 | 124 |
| Macrophage                | GSE72970 | 0.644 | 0.391 | 1.06 | 0.083 | 124 |
| NoneMethy+B-C4            | GSE72970 | 0.751 | 0.561 | 1    | 0.053 | 124 |
| NoneMethy-CAF-C4          | GSE72970 | 0.454 | 0.276 | 0.75 | 0.002 | 124 |
| WTAP+B-C2                 | GSE72970 | 0.754 | 0.581 | 0.98 | 0.035 | 124 |
| WTAP+CAF-C2               | GSE72970 | 0.624 | 0.443 | 0.88 | 0.007 | 124 |
| WTAP+mac-C1               | GSE72970 | 0.671 | 0.474 | 0.95 | 0.025 | 124 |

|                           |             |       |       |      |       |     |
|---------------------------|-------------|-------|-------|------|-------|-----|
| YTHDC1 &YTHDF3+mac_C4     | GSE72970    | 0.725 | 0.501 | 1.05 | 0.089 | 124 |
| YTHDF2+Reg T cells-C4     | GSE72970    | 0.578 | 0.412 | 0.81 | 0.002 | 124 |
| Regulatory T cells        | GSE72970    | 0.615 | 0.408 | 0.93 | 0.020 | 124 |
| ALKBH5+CD8+ T cells-C4    | TCGA_COAD   | 0.835 | 0.62  | 1.13 | 0.237 | 430 |
| B cells                   | TCGA_COAD   | 2.014 | 1.172 | 3.46 | 0.011 | 430 |
| CD8+ T cells              | TCGA_COAD   | 0.608 | 0.404 | 0.92 | 0.018 | 430 |
| HNRNPA2B1+B-C1            | TCGA_COAD   | 0.749 | 0.527 | 1.07 | 0.108 | 430 |
| HNRNPA2B1+CAF-C1          | TCGA_COAD   | 1.515 | 1.198 | 1.92 | 0.001 | 430 |
| HNRNPA2B1+CD8+ T cells-C1 | TCGA_COAD   | 0.802 | 0.634 | 1.02 | 0.066 | 430 |
| HNRNPA2B1+mac-C3          | TCGA_COAD   | 1.18  | 0.892 | 1.56 | 0.247 | 430 |
| HNRNPA2B1+Reg T cells-C1  | TCGA_COAD   | 0.787 | 0.625 | 0.99 | 0.042 | 430 |
| HNRNPC+CAF-C3             | TCGA_COAD   | 1.016 | 0.706 | 1.46 | 0.931 | 430 |
| Macrophage                | TCGA_COAD   | 0.602 | 0.397 | 0.91 | 0.017 | 430 |
| NoneMethy+B-C4            | TCGA_COAD   | 0.982 | 0.751 | 1.28 | 0.894 | 430 |
| NoneMethy-CAF-C4          | TCGA_COAD   | 1.334 | 0.876 | 2.03 | 0.179 | 430 |
| WTAP+B-C2                 | TCGA_COAD   | 0.762 | 0.544 | 1.07 | 0.114 | 430 |
| WTAP+CAF-C2               | TCGA_COAD   | 1.24  | 0.952 | 1.62 | 0.110 | 430 |
| WTAP+mac-C1               | TCGA_COAD   | 1.13  | 0.818 | 1.56 | 0.460 | 430 |
| YTHDC1 &YTHDF3+mac_C4     | TCGA_COAD   | 1.04  | 0.663 | 1.63 | 0.865 | 430 |
| YTHDF2+Reg T cells-C4     | TCGA_COAD   | 0.686 | 0.484 | 0.97 | 0.035 | 430 |
| Fibroblast                | TCGA_COAD   | 1.547 | 0.977 | 2.45 | 0.063 | 430 |
| Regulatory T cells        | TCGA_COAD   | 1.984 | 1.158 | 3.4  | 0.013 | 430 |
| ALKBH5+CD8+ T cells-C4    | TCGA_READ   | 1.048 | 0.582 | 1.89 | 0.875 | 154 |
| B cells                   | TCGA_READ   | 0.397 | 0.186 | 0.85 | 0.017 | 154 |
| CD8+ T cells              | TCGA_READ   | 0.488 | 0.197 | 1.21 | 0.122 | 154 |
| HNRNPA2B1+B-C1            | TCGA_READ   | 0.71  | 0.368 | 1.37 | 0.308 | 154 |
| HNRNPA2B1+CAF-C1          | TCGA_READ   | 1.044 | 0.616 | 1.77 | 0.874 | 154 |
| HNRNPA2B1+CD8+ T cells-C1 | TCGA_READ   | 0.747 | 0.443 | 1.26 | 0.274 | 154 |
| HNRNPA2B1+mac-C3          | TCGA_READ   | 1.152 | 0.769 | 1.73 | 0.493 | 154 |
| HNRNPA2B1+Reg T cells-C1  | TCGA_READ   | 0.814 | 0.493 | 1.34 | 0.420 | 154 |
| HNRNPC+CAF-C3             | TCGA_READ   | 1.004 | 0.505 | 2    | 0.992 | 154 |
| Macrophage                | TCGA_READ   | 0.468 | 0.204 | 1.07 | 0.072 | 154 |
| NoneMethy+B-C4            | TCGA_READ   | 1.157 | 0.689 | 1.94 | 0.581 | 154 |
| NoneMethy-CAF-C4          | TCGA_READ   | 0.8   | 0.433 | 1.48 | 0.476 | 154 |
| WTAP+B-C2                 | TCGA_READ   | 0.917 | 0.519 | 1.62 | 0.767 | 154 |
| WTAP+CAF-C2               | TCGA_READ   | 1.096 | 0.661 | 1.82 | 0.723 | 154 |
| WTAP+mac-C1               | TCGA_READ   | 1.251 | 0.811 | 1.93 | 0.312 | 154 |
| YTHDC1 &YTHDF3+mac_C4     | TCGA_READ   | 0.743 | 0.388 | 1.42 | 0.369 | 154 |
| YTHDF2+Reg T cells-C4     | TCGA_READ   | 1.161 | 0.628 | 2.15 | 0.635 | 154 |
| Fibroblast                | TCGA_READ   | 0.702 | 0.329 | 1.5  | 0.360 | 154 |
| Regulatory T cells        | TCGA_READ   | 0.325 | 0.148 | 0.72 | 0.005 | 154 |
| B cells                   | Meta-Pooled | 0.727 | 0.613 | 0.86 | 0.001 |     |
| CD8+ T cells              | Meta-Pooled | 0.721 | 0.614 | 0.85 | 0.001 |     |
| Fibroblast                | Meta-Pooled | 1.511 | 1.257 | 1.82 | 0.001 |     |
| HNRNPA2B1+CAF-C1          | Meta-Pooled | 1.197 | 1.079 | 1.33 | 0.001 |     |
| WTAP+CAF-C2               | Meta-Pooled | 1.172 | 1.05  | 1.31 | 0.005 |     |
| HNRNPC+CAF-C3             | Meta-Pooled | 0.962 | 0.832 | 1.11 | 0.599 |     |
| NoneMethy-CAF-C4          | Meta-Pooled | 1.278 | 1.107 | 1.48 | 0.001 |     |
| Macrophage                | Meta-Pooled | 0.89  | 0.745 | 1.07 | 0.203 |     |
| WTAP+mac-C1               | Meta-Pooled | 1.001 | 0.899 | 1.12 | 0.984 |     |
| HNRNPA2B1+mac-C3          | Meta-Pooled | 1.046 | 0.937 | 1.17 | 0.422 |     |
| YTHDC1 &YTHDF3+mac_C4     | Meta-Pooled | 0.999 | 0.876 | 1.14 | 0.983 |     |
| HNRNPA2B1+CD8+ T cells-C1 | Meta-Pooled | 0.797 | 0.717 | 0.89 | 0.001 |     |
| ALKBH5+CD8+ T cells-C4    | Meta-Pooled | 1.011 | 0.885 | 1.15 | 0.876 |     |
| HNRNPA2B1+Reg T cells-C1  | Meta-Pooled | 0.86  | 0.768 | 0.96 | 0.008 |     |
| YTHDF2+Reg T cells-C4     | Meta-Pooled | 0.896 | 0.781 | 1.03 | 0.113 |     |
| Regulatory T cells        | Meta-Pooled | 0.677 | 0.571 | 0.8  | 0.001 |     |
| HNRNPA2B1+B-C1            | Meta-Pooled | 0.727 | 0.634 | 0.83 | 0.001 |     |



|                |             |       |       |      |       |  |
|----------------|-------------|-------|-------|------|-------|--|
| WTAP+B-C2      | Meta-Pooled | 0.896 | 0.791 | 1.02 | 0.083 |  |
| NoneMethy+B-C4 | Meta-Pooled | 1.049 | 0.934 | 1.18 | 0.421 |  |

**TableS7:RFS of m6A-related Cell types In the Bulk sequences**

| m6A Sub                   | DataSet   | hazard.Rati | low   | up    | P.value | n   |
|---------------------------|-----------|-------------|-------|-------|---------|-----|
| HNRNPA2B1+B-C1            | GSE103479 | 0.22        | 0.118 | 0.41  | 0.000   | 154 |
| WTAP+B-C2                 | GSE103479 | 0.469       | 0.3   | 0.733 | 0.001   | 154 |
| NoneMethy+B-C4            | GSE103479 | 0.89        | 0.519 | 1.527 | 0.673   | 154 |
| HNRNPA2B1+CD8+ T cells-C1 | GSE103479 | 0.96        | 0.551 | 1.673 | 0.886   | 154 |
| ALKBH5+CD8+ T cells-C4    | GSE103479 | 0.464       | 0.27  | 0.796 | 0.005   | 154 |
| WTAP+mac-C1               | GSE103479 | 0.722       | 0.476 | 1.097 | 0.127   | 154 |
| HNRNPA2B1+mac-C3          | GSE103479 | 1.096       | 0.673 | 1.783 | 0.713   | 154 |
| YTHDC1 &YTHDF3+mac_C4     | GSE103479 | 0.496       | 0.303 | 0.812 | 0.005   | 154 |
| HNRNPA2B1+Reg T cells-C1  | GSE103479 | 1.867       | 1.083 | 3.216 | 0.025   | 154 |
| YTHDF2+Reg T cells-C4     | GSE103479 | 0.694       | 0.415 | 1.159 | 0.163   | 154 |
| HNRNPA2B1+CAF-C1          | GSE103479 | 0.528       | 0.352 | 0.793 | 0.002   | 154 |
| WTAP+CAF-C2               | GSE103479 | 0.568       | 0.352 | 0.918 | 0.021   | 154 |
| HNRNPC+CAF-C3             | GSE103479 | 0.52        | 0.327 | 0.827 | 0.006   | 154 |
| NoneMethy-CAF-C4          | GSE103479 | 1.041       | 0.64  | 1.694 | 0.871   | 154 |
| HNRNPA2B1+B-C1            | GSE14333  | 0.685       | 0.496 | 0.947 | 0.022   | 196 |
| WTAP+B-C2                 | GSE14333  | 0.534       | 0.363 | 0.786 | 0.001   | 196 |
| NoneMethy+B-C4            | GSE14333  | 0.694       | 0.542 | 0.89  | 0.004   | 196 |
| HNRNPA2B1+CD8+ T cells-C1 | GSE14333  | 1.243       | 1.004 | 1.539 | 0.046   | 196 |
| ALKBH5+CD8+ T cells-C4    | GSE14333  | 1.001       | 0.715 | 1.402 | 0.995   | 196 |
| WTAP+mac-C1               | GSE14333  | 1.506       | 1.059 | 2.144 | 0.023   | 196 |
| HNRNPA2B1+mac-C3          | GSE14333  | 0.896       | 0.616 | 1.306 | 0.569   | 196 |
| YTHDC1 &YTHDF3+mac_C4     | GSE14333  | 0.803       | 0.6   | 1.074 | 0.139   | 196 |
| HNRNPA2B1+Reg T cells-C1  | GSE14333  | 0.66        | 0.473 | 0.921 | 0.015   | 196 |
| YTHDF2+Reg T cells-C4     | GSE14333  | 0.756       | 0.582 | 0.981 | 0.036   | 196 |
| HNRNPA2B1+CAF-C1          | GSE14333  | 0.773       | 0.628 | 0.95  | 0.015   | 196 |
| WTAP+CAF-C2               | GSE14333  | 0.822       | 0.664 | 1.018 | 0.072   | 196 |
| HNRNPC+CAF-C3             | GSE14333  | 0.68        | 0.502 | 0.922 | 0.013   | 196 |
| NoneMethy-CAF-C4          | GSE14333  | 1.185       | 0.907 | 1.549 | 0.214   | 196 |
| HNRNPA2B1+B-C1            | GSE17538  | 0.381       | 0.242 | 0.599 | 0.000   | 200 |
| WTAP+B-C2                 | GSE17538  | 0.875       | 0.507 | 1.51  | 0.633   | 200 |
| NoneMethy+B-C4            | GSE17538  | 1.441       | 0.853 | 2.435 | 0.172   | 200 |
| HNRNPA2B1+CD8+ T cells-C1 | GSE17538  | 0.929       | 0.654 | 1.319 | 0.679   | 200 |
| ALKBH5+CD8+ T cells-C4    | GSE17538  | 2.073       | 1.232 | 3.488 | 0.006   | 200 |
| WTAP+mac-C1               | GSE17538  | 1.741       | 1.22  | 2.486 | 0.002   | 200 |
| HNRNPA2B1+mac-C3          | GSE17538  | 1.719       | 1.211 | 2.439 | 0.002   | 200 |
| YTHDC1 &YTHDF3+mac_C4     | GSE17538  | 2.688       | 1.627 | 4.44  | 0.000   | 200 |
| HNRNPA2B1+Reg T cells-C1  | GSE17538  | 1.484       | 0.998 | 2.207 | 0.051   | 200 |
| YTHDF2+Reg T cells-C4     | GSE17538  | 0.86        | 0.528 | 1.4   | 0.543   | 200 |
| HNRNPA2B1+CAF-C1          | GSE17538  | 1.546       | 1.108 | 2.158 | 0.010   | 200 |
| WTAP+CAF-C2               | GSE17538  | 1.758       | 1.22  | 2.533 | 0.002   | 200 |
| HNRNPC+CAF-C3             | GSE17538  | 1.029       | 0.652 | 1.622 | 0.904   | 200 |
| NoneMethy-CAF-C4          | GSE17538  | 2.117       | 1.407 | 3.185 | 0.000   | 200 |
| HNRNPA2B1+B-C1            | GSE33113  | 0.956       | 0.48  | 1.902 | 0.898   | 96  |
| WTAP+B-C2                 | GSE33113  | 2.959       | 1.623 | 5.394 | 0.000   | 96  |
| NoneMethy+B-C4            | GSE33113  | 3.191       | 1.728 | 5.892 | 0.000   | 96  |
| HNRNPA2B1+CD8+ T cells-C1 | GSE33113  | 2.158       | 1.096 | 4.249 | 0.026   | 96  |
| ALKBH5+CD8+ T cells-C4    | GSE33113  | 1.733       | 0.79  | 3.802 | 0.170   | 96  |
| WTAP+mac-C1               | GSE33113  | 3.595       | 2.022 | 6.392 | 0.000   | 96  |
| HNRNPA2B1+mac-C3          | GSE33113  | 2.45        | 1.386 | 4.331 | 0.002   | 96  |
| YTHDC1 &YTHDF3+mac_C4     | GSE33113  | 3.162       | 1.666 | 5.999 | 0.000   | 96  |
| HNRNPA2B1+Reg T cells-C1  | GSE33113  | 2.588       | 1.391 | 4.815 | 0.003   | 96  |
| YTHDF2+Reg T cells-C4     | GSE33113  | 2.465       | 1.007 | 6.031 | 0.048   | 96  |
| HNRNPA2B1+CAF-C1          | GSE33113  | 2.669       | 1.465 | 4.86  | 0.001   | 96  |

|                          |          |       |       |        |       |     |
|--------------------------|----------|-------|-------|--------|-------|-----|
| WTAP+CAF-C2              | GSE33113 | 4.465 | 2.337 | 8.532  | 0.000 | 96  |
| HNRNPC+CAF-C3            | GSE33113 | 1.222 | 0.607 | 2.459  | 0.574 | 96  |
| NoneMethy-CAF-C4         | GSE33113 | 4.743 | 2.159 | 10.419 | 0.000 | 96  |
| HNRNPA2B1+B-C1           | GSE37892 | 0.811 | 0.433 | 1.517  | 0.512 | 130 |
| WTAP+B-C2                | GSE37892 | 2.017 | 1.308 | 3.111  | 0.002 | 130 |
| NoneMethy+B-C4           | GSE37892 | 1.717 | 1.19  | 2.478  | 0.004 | 130 |
| HNRNPA2B1+CD8+ T cells-C | GSE37892 | 1.501 | 0.994 | 2.266  | 0.053 | 130 |
| ALKBH5+CD8+ T cells-C4   | GSE37892 | 1.171 | 0.671 | 2.041  | 0.579 | 130 |
| WTAP+mac-C1              | GSE37892 | 1.508 | 0.956 | 2.378  | 0.077 | 130 |
| HNRNPA2B1+mac-C3         | GSE37892 | 1.721 | 1.142 | 2.595  | 0.010 | 130 |
| YTHDC1 &YTHDF3+mac_C4    | GSE37892 | 2.163 | 1.294 | 3.617  | 0.003 | 130 |
| HNRNPA2B1+Reg T cells-C1 | GSE37892 | 1.579 | 1.092 | 2.283  | 0.015 | 130 |
| YTHDF2+Reg T cells-C4    | GSE37892 | 0.99  | 0.541 | 1.81   | 0.973 | 130 |
| HNRNPA2B1+CAF-C1         | GSE37892 | 2.118 | 1.288 | 3.484  | 0.003 | 130 |
| WTAP+CAF-C2              | GSE37892 | 3.18  | 1.2   | 8.424  | 0.020 | 130 |
| HNRNPC+CAF-C3            | GSE37892 | 0.994 | 0.539 | 1.832  | 0.985 | 130 |
| NoneMethy-CAF-C4         | GSE37892 | 1.437 | 0.786 | 2.626  | 0.239 | 130 |
| HNRNPA2B1+B-C1           | GSE38832 | 0.314 | 0.185 | 0.534  | 0.000 | 122 |
| WTAP+B-C2                | GSE38832 | 0.4   | 0.222 | 0.721  | 0.002 | 122 |
| NoneMethy+B-C4           | GSE38832 | 0.848 | 0.54  | 1.332  | 0.475 | 122 |
| HNRNPA2B1+CD8+ T cells-C | GSE38832 | 0.321 | 0.171 | 0.603  | 0.000 | 122 |
| ALKBH5+CD8+ T cells-C4   | GSE38832 | 0.967 | 0.584 | 1.6    | 0.895 | 122 |
| WTAP+mac-C1              | GSE38832 | 1.043 | 0.669 | 1.627  | 0.853 | 122 |
| HNRNPA2B1+mac-C3         | GSE38832 | 0.913 | 0.567 | 1.471  | 0.710 | 122 |
| YTHDC1 &YTHDF3+mac_C4    | GSE38832 | 0.997 | 0.607 | 1.635  | 0.989 | 122 |
| HNRNPA2B1+Reg T cells-C1 | GSE38832 | 0.604 | 0.397 | 0.918  | 0.018 | 122 |
| YTHDF2+Reg T cells-C4    | GSE38832 | 0.483 | 0.278 | 0.839  | 0.010 | 122 |
| HNRNPA2B1+CAF-C1         | GSE38832 | 1.447 | 0.964 | 2.174  | 0.075 | 122 |
| WTAP+CAF-C2              | GSE38832 | 1.498 | 0.969 | 2.316  | 0.069 | 122 |
| HNRNPC+CAF-C3            | GSE38832 | 0.93  | 0.494 | 1.753  | 0.823 | 122 |
| NoneMethy-CAF-C4         | GSE38832 | 1.857 | 1.131 | 3.049  | 0.014 | 122 |
| HNRNPA2B1+B-C1           | GSE39582 | 0.638 | 0.493 | 0.826  | 0.001 | 557 |
| WTAP+B-C2                | GSE39582 | 1.178 | 0.926 | 1.5    | 0.182 | 557 |
| NoneMethy+B-C4           | GSE39582 | 1.172 | 0.936 | 1.469  | 0.166 | 557 |
| HNRNPA2B1+CD8+ T cells-C | GSE39582 | 0.707 | 0.582 | 0.859  | 0.000 | 557 |
| ALKBH5+CD8+ T cells-C4   | GSE39582 | 1.108 | 0.858 | 1.43   | 0.432 | 557 |
| WTAP+mac-C1              | GSE39582 | 0.989 | 0.822 | 1.19   | 0.907 | 557 |
| HNRNPA2B1+mac-C3         | GSE39582 | 1.015 | 0.823 | 1.251  | 0.890 | 557 |
| YTHDC1 &YTHDF3+mac_C4    | GSE39582 | 1.072 | 0.868 | 1.323  | 0.518 | 557 |
| HNRNPA2B1+Reg T cells-C1 | GSE39582 | 0.736 | 0.573 | 0.945  | 0.016 | 557 |
| YTHDF2+Reg T cells-C4    | GSE39582 | 1.057 | 0.814 | 1.373  | 0.678 | 557 |
| HNRNPA2B1+CAF-C1         | GSE39582 | 1.37  | 1.124 | 1.671  | 0.002 | 557 |
| WTAP+CAF-C2              | GSE39582 | 1.374 | 1.131 | 1.669  | 0.001 | 557 |
| HNRNPC+CAF-C3            | GSE39582 | 1.212 | 0.901 | 1.629  | 0.204 | 557 |
| NoneMethy-CAF-C4         | GSE39582 | 1.598 | 1.21  | 2.109  | 0.001 | 557 |
| HNRNPA2B1+B-C1           | GSE41258 | 2.301 | 1.187 | 4.462  | 0.014 | 152 |
| WTAP+B-C2                | GSE41258 | 1.783 | 1.027 | 3.094  | 0.040 | 152 |
| NoneMethy+B-C4           | GSE41258 | 1.849 | 1.145 | 2.987  | 0.012 | 152 |
| HNRNPA2B1+CD8+ T cells-C | GSE41258 | 0.509 | 0.274 | 0.945  | 0.032 | 152 |
| ALKBH5+CD8+ T cells-C4   | GSE41258 | 2.177 | 0.916 | 5.173  | 0.078 | 152 |
| WTAP+mac-C1              | GSE41258 | 0.653 | 0.391 | 1.09   | 0.103 | 152 |
| HNRNPA2B1+mac-C3         | GSE41258 | 1.131 | 0.566 | 2.257  | 0.728 | 152 |
| YTHDC1 &YTHDF3+mac_C4    | GSE41258 | 0.983 | 0.459 | 2.104  | 0.965 | 152 |
| HNRNPA2B1+Reg T cells-C1 | GSE41258 | 0.987 | 0.468 | 2.081  | 0.972 | 152 |
| YTHDF2+Reg T cells-C4    | GSE41258 | 1.467 | 0.664 | 3.242  | 0.343 | 152 |
| HNRNPA2B1+CAF-C1         | GSE41258 | 1.787 | 1.145 | 2.788  | 0.011 | 152 |
| WTAP+CAF-C2              | GSE41258 | 1.75  | 1.022 | 2.997  | 0.041 | 152 |
| HNRNPC+CAF-C3            | GSE41258 | 0.807 | 0.408 | 1.598  | 0.539 | 152 |

|                           |           |        |       |        |       |     |
|---------------------------|-----------|--------|-------|--------|-------|-----|
| NoneMethy-CAF-C4          | GSE41258  | 2.376  | 1.268 | 4.452  | 0.007 | 152 |
| HNRNPA2B1+B-C1            | GSE72970  | 0.862  | 0.611 | 1.217  | 0.400 | 124 |
| WTAP+B-C2                 | GSE72970  | 0.662  | 0.519 | 0.845  | 0.001 | 124 |
| NoneMethy+B-C4            | GSE72970  | 0.689  | 0.525 | 0.902  | 0.007 | 124 |
| HNRNPA2B1+CD8+ T cells-C1 | GSE72970  | 0.73   | 0.582 | 0.916  | 0.007 | 124 |
| ALKBH5+CD8+ T cells-C4    | GSE72970  | 0.655  | 0.491 | 0.874  | 0.004 | 124 |
| WTAP+mac-C1               | GSE72970  | 0.687  | 0.503 | 0.938  | 0.018 | 124 |
| HNRNPA2B1+mac-C3          | GSE72970  | 0.689  | 0.537 | 0.885  | 0.003 | 124 |
| YTHDC1 &YTHDF3+mac_C4     | GSE72970  | 0.592  | 0.417 | 0.84   | 0.003 | 124 |
| HNRNPA2B1+Reg T cells-C1  | GSE72970  | 0.709  | 0.575 | 0.875  | 0.001 | 124 |
| YTHDF2+Reg T cells-C4     | GSE72970  | 0.574  | 0.421 | 0.783  | 0.000 | 124 |
| HNRNPA2B1+CAF-C1          | GSE72970  | 0.563  | 0.411 | 0.77   | 0.000 | 124 |
| WTAP+CAF-C2               | GSE72970  | 0.666  | 0.497 | 0.892  | 0.006 | 124 |
| HNRNPC+CAF-C3             | GSE72970  | 0.797  | 0.543 | 1.17   | 0.247 | 124 |
| NoneMethy-CAF-C4          | GSE72970  | 0.504  | 0.327 | 0.777  | 0.002 | 124 |
| HNRNPA2B1+B-C1            | TCGA_COAD | 0.791  | 0.548 | 1.142  | 0.211 | 430 |
| WTAP+B-C2                 | TCGA_COAD | 0.591  | 0.422 | 0.828  | 0.002 | 430 |
| NoneMethy+B-C4            | TCGA_COAD | 0.948  | 0.717 | 1.253  | 0.706 | 430 |
| HNRNPA2B1+CD8+ T cells-C1 | TCGA_COAD | 0.689  | 0.539 | 0.881  | 0.003 | 430 |
| ALKBH5+CD8+ T cells-C4    | TCGA_COAD | 0.841  | 0.614 | 1.151  | 0.279 | 430 |
| WTAP+mac-C1               | TCGA_COAD | 1.368  | 1.016 | 1.842  | 0.039 | 430 |
| HNRNPA2B1+mac-C3          | TCGA_COAD | 1.373  | 1.045 | 1.804  | 0.023 | 430 |
| YTHDC1 &YTHDF3+mac_C4     | TCGA_COAD | 1.762  | 1.177 | 2.637  | 0.006 | 430 |
| HNRNPA2B1+Reg T cells-C1  | TCGA_COAD | 0.742  | 0.586 | 0.941  | 0.014 | 430 |
| YTHDF2+Reg T cells-C4     | TCGA_COAD | 0.571  | 0.401 | 0.815  | 0.002 | 430 |
| HNRNPA2B1+CAF-C1          | TCGA_COAD | 1.807  | 1.419 | 2.302  | 0.000 | 430 |
| WTAP+CAF-C2               | TCGA_COAD | 1.562  | 1.204 | 2.025  | 0.001 | 430 |
| HNRNPC+CAF-C3             | TCGA_COAD | 1.216  | 0.836 | 1.769  | 0.306 | 430 |
| NoneMethy-CAF-C4          | TCGA_COAD | 1.74   | 1.127 | 2.684  | 0.012 | 430 |
| HNRNPA2B1+B-C1            | TCGA_READ | 1.401  | 0.432 | 4.539  | 0.574 | 154 |
| WTAP+B-C2                 | TCGA_READ | 3.648  | 1.247 | 10.669 | 0.018 | 154 |
| NoneMethy+B-C4            | TCGA_READ | 5.08   | 1.681 | 15.35  | 0.004 | 154 |
| HNRNPA2B1+CD8+ T cells-C1 | TCGA_READ | 1.103  | 0.436 | 2.791  | 0.836 | 154 |
| ALKBH5+CD8+ T cells-C4    | TCGA_READ | 8.144  | 2.119 | 31.292 | 0.002 | 154 |
| WTAP+mac-C1               | TCGA_READ | 1.877  | 0.736 | 4.782  | 0.187 | 154 |
| HNRNPA2B1+mac-C3          | TCGA_READ | 1.626  | 0.683 | 3.871  | 0.272 | 154 |
| YTHDC1 &YTHDF3+mac_C4     | TCGA_READ | 5.538  | 1.58  | 19.414 | 0.007 | 154 |
| HNRNPA2B1+Reg T cells-C1  | TCGA_READ | 7.324  | 1.007 | 53.283 | 0.049 | 154 |
| YTHDF2+Reg T cells-C4     | TCGA_READ | 11.636 | 2.966 | 45.648 | 0.000 | 154 |
| HNRNPA2B1+CAF-C1          | TCGA_READ | 5.576  | 1.726 | 18.011 | 0.004 | 154 |
| WTAP+CAF-C2               | TCGA_READ | 2.761  | 1.065 | 7.153  | 0.037 | 154 |
| HNRNPC+CAF-C3             | TCGA_READ | 8.595  | 2.204 | 33.511 | 0.002 | 154 |
| NoneMethy-CAF-C4          | TCGA_READ | 5.474  | 1.635 | 18.328 | 0.006 | 154 |
| B cells                   | GSE17538  | 0.487  | 0.245 | 0.967  | 0.040 | 200 |
| B cells                   | GSE33113  | 3.216  | 1.265 | 8.174  | 0.014 | 96  |
| B cells                   | GSE37892  | 2.258  | 1.177 | 4.332  | 0.014 | 130 |
| B cells                   | GSE38832  | 0.336  | 0.161 | 0.703  | 0.004 | 122 |
| B cells                   | GSE39582  | 0.82   | 0.605 | 1.113  | 0.203 | 557 |
| B cells                   | GSE41258  | 1.581  | 0.735 | 3.401  | 0.242 | 152 |
| B cells                   | TCGA_COAD | 0.569  | 0.373 | 0.869  | 0.009 | 430 |
| B cells                   | TCGA_READ | 7.093  | 0.848 | 59.343 | 0.071 | 154 |
| B cells                   | GSE14333  | 0.576  | 0.342 | 0.971  | 0.038 | 196 |
| B cells                   | GSE103479 | 0.218  | 0.108 | 0.439  | 0.000 | 154 |
| B cells                   | GSE72970  | 0.651  | 0.45  | 0.942  | 0.023 | 124 |
| CD8+ T cells              | GSE17538  | 2.095  | 0.896 | 4.898  | 0.088 | 200 |
| CD8+ T cells              | GSE33113  | 10.869 | 1.45  | 81.471 | 0.020 | 96  |
| CD8+ T cells              | GSE37892  | 2.088  | 0.954 | 4.57   | 0.065 | 130 |
| CD8+ T cells              | GSE38832  | 0.185  | 0.044 | 0.773  | 0.021 | 122 |

|                          |             |       |       |        |       |     |
|--------------------------|-------------|-------|-------|--------|-------|-----|
| CD8+ T cells             | GSE39582    | 0.624 | 0.438 | 0.891  | 0.009 | 557 |
| CD8+ T cells             | GSE41258    | 0.64  | 0.243 | 1.685  | 0.367 | 152 |
| CD8+ T cells             | TCGA_COAD   | 0.57  | 0.375 | 0.868  | 0.009 | 430 |
| CD8+ T cells             | TCGA_READ   | 4.867 | 0.586 | 40.433 | 0.143 | 154 |
| CD8+ T cells             | GSE14333    | 1.411 | 0.956 | 2.081  | 0.083 | 196 |
| CD8+ T cells             | GSE103479   | 0.582 | 0.314 | 1.078  | 0.085 | 154 |
| CD8+ T cells             | GSE72970    | 0.65  | 0.446 | 0.947  | 0.025 | 124 |
| Macrophage               | GSE17538    | 2.921 | 1.379 | 6.19   | 0.005 | 200 |
| Macrophage               | GSE33113    | 5.523 | 1.987 | 15.353 | 0.001 | 96  |
| Macrophage               | GSE37892    | 1.965 | 0.927 | 4.167  | 0.078 | 130 |
| Macrophage               | GSE38832    | 0.242 | 0.058 | 1.009  | 0.051 | 122 |
| Macrophage               | GSE39582    | 0.745 | 0.547 | 1.016  | 0.063 | 557 |
| Macrophage               | GSE41258    | 0.528 | 0.215 | 1.298  | 0.164 | 152 |
| Macrophage               | TCGA_COAD   | 1.725 | 0.999 | 2.977  | 0.050 | 430 |
| Macrophage               | TCGA_READ   | 2.261 | 0.437 | 11.695 | 0.331 | 154 |
| Macrophage               | GSE14333    | 1.673 | 0.99  | 2.827  | 0.054 | 196 |
| Macrophage               | GSE103479   | 0.665 | 0.307 | 1.441  | 0.301 | 154 |
| Macrophage               | GSE72970    | 0.645 | 0.42  | 0.992  | 0.046 | 124 |
| Regulatory T cells       | GSE17538    | 1.436 | 0.702 | 2.937  | 0.322 | 200 |
| Regulatory T cells       | GSE33113    | 6.165 | 1.795 | 21.172 | 0.004 | 96  |
| Regulatory T cells       | GSE37892    | 2.105 | 1.07  | 4.14   | 0.031 | 130 |
| Regulatory T cells       | GSE38832    | 0.368 | 0.175 | 0.774  | 0.008 | 122 |
| Regulatory T cells       | GSE39582    | 0.707 | 0.494 | 1.013  | 0.059 | 557 |
| Regulatory T cells       | GSE41258    | 0.428 | 0.173 | 1.057  | 0.066 | 152 |
| Regulatory T cells       | TCGA_COAD   | 0.569 | 0.373 | 0.87   | 0.009 | 430 |
| Regulatory T cells       | TCGA_READ   | 9.323 | 1.121 | 77.537 | 0.039 | 154 |
| Regulatory T cells       | GSE14333    | 0.603 | 0.362 | 1.005  | 0.052 | 196 |
| Regulatory T cells       | GSE103479   | 1.579 | 0.848 | 2.942  | 0.150 | 154 |
| Regulatory T cells       | GSE72970    | 0.584 | 0.403 | 0.846  | 0.004 | 124 |
| Fibroblast               | GSE17538    | 1.853 | 1.083 | 3.17   | 0.024 | 200 |
| Fibroblast               | GSE33113    | 5.402 | 1.789 | 16.312 | 0.003 | 96  |
| Fibroblast               | GSE37892    | 5.301 | 1.274 | 22.054 | 0.022 | 130 |
| Fibroblast               | GSE38832    | 1.751 | 0.853 | 3.596  | 0.127 | 122 |
| Fibroblast               | GSE39582    | 1.853 | 1.317 | 2.606  | 0.000 | 557 |
| Fibroblast               | GSE41258    | 2.08  | 0.92  | 4.701  | 0.078 | 152 |
| Fibroblast               | TCGA_COAD   | 2.548 | 1.632 | 3.978  | 0.000 | 430 |
| Fibroblast               | TCGA_READ   | 6.833 | 0.822 | 56.791 | 0.075 | 154 |
| Fibroblast               | GSE14333    | 0.751 | 0.535 | 1.054  | 0.097 | 196 |
| Fibroblast               | GSE103479   | 0.594 | 0.317 | 1.113  | 0.104 | 154 |
| Fibroblast               | GSE72970    | 0.398 | 0.21  | 0.752  | 0.005 | 124 |
| Fibroblast               | Meta-Pooled | 1.38  | 1.171 | 1.626  | 0.001 |     |
| HNRNPA2B1+CAF-C1         | Meta-Pooled | 1.184 | 1.076 | 1.303  | 0.001 |     |
| WTAP+CAF-C2              | Meta-Pooled | 1.193 | 1.08  | 1.319  | 0.001 |     |
| HNRNPC+CAF-C3            | Meta-Pooled | 0.929 | 0.812 | 1.062  | 0.279 |     |
| NoneMethy-CAF-C4         | Meta-Pooled | 1.443 | 1.267 | 1.643  | 0.000 |     |
| Macrophage               | Meta-Pooled | 1.025 | 0.858 | 1.224  | 0.786 |     |
| WTAP+mac-C1              | Meta-Pooled | 1.121 | 1.009 | 1.245  | 0.033 |     |
| HNRNPA2B1+mac-C3         | Meta-Pooled | 1.109 | 0.997 | 1.233  | 0.057 |     |
| YTHDC1 &YTHDF3+mac_C4    | Meta-Pooled | 1.09  | 0.967 | 1.229  | 0.158 |     |
| CD8+ T cells             | Meta-Pooled | 0.783 | 0.663 | 0.925  | 0.004 |     |
| HNRNPA2B1+CD8+ T cells-C | Meta-Pooled | 0.851 | 0.773 | 0.936  | 0.001 |     |
| ALKBH5+CD8+ T cells-C4   | Meta-Pooled | 0.973 | 0.859 | 1.102  | 0.667 |     |
| Regulatory T cells       | Meta-Pooled | 0.758 | 0.641 | 0.897  | 0.001 |     |
| HNRNPA2B1+Reg T cells-C1 | Meta-Pooled | 0.863 | 0.778 | 0.957  | 0.005 |     |
| YTHDF2+Reg T cells-C4    | Meta-Pooled | 0.795 | 0.702 | 0.9    | 0.001 |     |
| B cells                  | Meta-Pooled | 0.712 | 0.608 | 0.834  | 0.001 |     |
| HNRNPA2B1+B-C1           | Meta-Pooled | 0.66  | 0.579 | 0.751  | 0.001 |     |
| WTAP+B-C2                | Meta-Pooled | 0.871 | 0.775 | 0.979  | 0.021 |     |

|                |             |      |       |       |       |  |
|----------------|-------------|------|-------|-------|-------|--|
| NoneMethy+B-C4 | Meta-Pooled | 1.03 | 0.927 | 1.144 | 0.587 |  |
|----------------|-------------|------|-------|-------|-------|--|

**TableS8:m6A-related Cell type signatures to response of ICB immunotherapy in the Bulk sequences**

| m6A Sub                      | OR    | CI95        | P.value | Set                                        |
|------------------------------|-------|-------------|---------|--------------------------------------------|
| Fibroblast                   | 1.793 | 1.032-3.117 | 0.039   | IMvigor210(2018)PDL<br>1_Urothelial_Cancer |
| Macrophage                   | 1.079 | 0.628-1.853 | 0.783   | IMvigor210(2018)PDL<br>1_Urothelial_Cancer |
| Regulatory T cells           | 0.889 | 0.517-1.526 | 0.67    | IMvigor210(2018)PDL<br>1_Urothelial_Cancer |
| CD8+ T cells                 | 0.658 | 0.381-1.138 | 0.133   | IMvigor210(2018)PDL<br>1_Urothelial_Cancer |
| B cells                      | 0.782 | 0.454-1.344 | 0.373   | IMvigor210(2018)PDL<br>1_Urothelial_Cancer |
| WTAP+mac-C1                  | 1.325 | 0.77-2.279  | 0.31    | IMvigor210(2018)PDL<br>1_Urothelial_Cancer |
| HNRNPA2B1+mac-C3             | 0.895 | 0.521-1.537 | 0.688   | IMvigor210(2018)PDL<br>1_Urothelial_Cancer |
| YTHDC1<br>&YTHDF3+mac_C4     | 0.62  | 0.358-1.072 | 0.087   | IMvigor210(2018)PDL<br>1_Urothelial_Cancer |
| HNRNPA2B1+CAF-C1             | 0.801 | 0.465-1.378 | 0.422   | IMvigor210(2018)PDL<br>1_Urothelial_Cancer |
| WTAP+CAF-C2                  | 1.957 | 1.123-3.406 | 0.017   | IMvigor210(2018)PDL<br>1_Urothelial_Cancer |
| HNRNPC+CAF-C3                | 1     | 0.582-1.718 | 1       | IMvigor210(2018)PDL<br>1_Urothelial_Cancer |
| NoneMethy-CAF-C4             | 0.815 | 0.474-1.399 | 0.459   | IMvigor210(2018)PDL<br>1_Urothelial_Cancer |
| HNRNPA2B1+CD8+ T<br>cells-C1 | 0.381 | 0.215-0.674 | 0.001   | IMvigor210(2018)PDL<br>1_Urothelial_Cancer |
| ALKBH5+CD8+ T<br>cells-C4    | 1.042 | 0.607-1.79  | 0.881   | IMvigor210(2018)PDL<br>1_Urothelial_Cancer |
| HNRNPA2B1+Reg T<br>cells-C1  | 0.544 | 0.313-0.942 | 0.03    | IMvigor210(2018)PDL<br>1_Urothelial_Cancer |
| YTHDF2+Reg T cells-<br>C4    | 1.042 | 0.607-1.79  | 0.881   | IMvigor210(2018)PDL<br>1_Urothelial_Cancer |
| HNRNPA2B1+B-C1               | 0.304 | 0.169-0.545 | 0       | IMvigor210(2018)PDL<br>1_Urothelial_Cancer |
| WTAP+B-C2                    | 1.586 | 0.916-2.745 | 0.099   | IMvigor210(2018)PDL<br>1_Urothelial_Cancer |
| NoneMethy+B-C4               | 1.372 | 0.797-2.361 | 0.254   | IMvigor210(2018)PDL<br>1_Urothelial_Cancer |
| Fibroblast                   | 0.658 | 0.224-1.933 | 0.447   | Ulloa(2013)MAGE_A3<br>_Melanoma            |
| Macrophage                   | 0.327 | 0.106-1.008 | 0.052   | Ulloa(2013)MAGE_A3<br>_Melanoma            |
| Regulatory T cells           | 0.182 | 0.054-0.613 | 0.006   | Ulloa(2013)MAGE_A3<br>_Melanoma            |
| CD8+ T cells                 | 0.182 | 0.054-0.613 | 0.006   | Ulloa(2013)MAGE_A3<br>_Melanoma            |
| B cells                      | 0.415 | 0.135-1.273 | 0.124   | Ulloa(2013)MAGE_A3<br>_Melanoma            |
| WTAP+mac-C1                  | 0.232 | 0.072-0.745 | 0.014   | Ulloa(2013)MAGE_A3<br>_Melanoma            |
| HNRNPA2B1+mac-C3             | 0.327 | 0.106-1.008 | 0.052   | Ulloa(2013)MAGE_A3<br>_Melanoma            |

|                              |       |             |       |                                 |
|------------------------------|-------|-------------|-------|---------------------------------|
| YTHDC1<br>&YTHDF3+mac_C4     | 1.35  | 0.46-3.959  | 0.585 | Ulloa(2013)MAGE_A3<br>_Melanoma |
| HNRNPA2B1+CAF-C1             | 0.615 | 0.208-1.818 | 0.38  | Ulloa(2013)MAGE_A3<br>_Melanoma |
| WTAP+CAF-C2                  | 0.615 | 0.208-1.818 | 0.38  | Ulloa(2013)MAGE_A3<br>_Melanoma |
| HNRNPC+CAF-C3                | 1.067 | 0.364-3.13  | 0.906 | Ulloa(2013)MAGE_A3<br>_Melanoma |
| NoneMethy-CAF-C4             | 0.889 | 0.304-2.601 | 0.83  | Ulloa(2013)MAGE_A3<br>_Melanoma |
| HNRNPA2B1+CD8+ T<br>cells-C1 | 0.289 | 0.093-0.897 | 0.032 | Ulloa(2013)MAGE_A3<br>_Melanoma |
| ALKBH5+CD8+ T<br>cells-C4    | 1     | 0.342-2.922 | 1     | Ulloa(2013)MAGE_A3<br>_Melanoma |
| HNRNPA2B1+Reg T<br>cells-C1  | 0.16  | 0.047-0.544 | 0.003 | Ulloa(2013)MAGE_A3<br>_Melanoma |
| YTHDF2+Reg T cells-<br>C4    | 0.889 | 0.304-2.601 | 0.83  | Ulloa(2013)MAGE_A3<br>_Melanoma |
| HNRNPA2B1+B-C1               | 0.583 | 0.198-1.721 | 0.329 | Ulloa(2013)MAGE_A3<br>_Melanoma |
| WTAP+B-C2                    | 0.833 | 0.284-2.445 | 0.74  | Ulloa(2013)MAGE_A3<br>_Melanoma |
| NoneMethy+B-C4               | 0.692 | 0.234-2.046 | 0.506 | Ulloa(2013)MAGE_A3<br>_Melanoma |
| Fibroblast                   | 0.744 | 0.354-1.563 | 0.436 | Braun(2020)PD1_CCR<br>CC        |
| Macrophage                   | 0.44  | 0.203-0.954 | 0.038 | Braun(2020)PD1_CCR<br>CC        |
| Regulatory T cells           | 0.607 | 0.286-1.285 | 0.192 | Braun(2020)PD1_CCR<br>CC        |
| CD8+ T cells                 | 0.688 | 0.327-1.446 | 0.323 | Braun(2020)PD1_CCR<br>CC        |
| B cells                      | 0.73  | 0.347-1.534 | 0.406 | Braun(2020)PD1_CCR<br>CC        |
| WTAP+mac-C1                  | 0.523 | 0.245-1.119 | 0.095 | Braun(2020)PD1_CCR<br>CC        |
| HNRNPA2B1+mac-C3             | 0.631 | 0.298-1.337 | 0.229 | Braun(2020)PD1_CCR<br>CC        |
| YTHDC1<br>&YTHDF3+mac_C4     | 0.809 | 0.386-1.694 | 0.574 | Braun(2020)PD1_CCR<br>CC        |
| HNRNPA2B1+CAF-C1             | 0.774 | 0.368-1.627 | 0.499 | Braun(2020)PD1_CCR<br>CC        |
| WTAP+CAF-C2                  | 0.431 | 0.195-0.95  | 0.037 | Braun(2020)PD1_CCR<br>CC        |
| HNRNPC+CAF-C3                | 0.533 | 0.249-1.141 | 0.105 | Braun(2020)PD1_CCR<br>CC        |
| NoneMethy-CAF-C4             | 0.825 | 0.394-1.728 | 0.61  | Braun(2020)PD1_CCR<br>CC        |
| HNRNPA2B1+CD8+ T<br>cells-C1 | 1.094 | 0.524-2.286 | 0.81  | Braun(2020)PD1_CCR<br>CC        |
| ALKBH5+CD8+ T<br>cells-C4    | 0.683 | 0.322-1.446 | 0.319 | Braun(2020)PD1_CCR<br>CC        |
| HNRNPA2B1+Reg T<br>cells-C1  | 0.858 | 0.41-1.797  | 0.685 | Braun(2020)PD1_CCR<br>CC        |
| YTHDF2+Reg T cells-<br>C4    | 1.094 | 0.524-2.286 | 0.81  | Braun(2020)PD1_CCR<br>CC        |
| HNRNPA2B1+B-C1               | 1.344 | 0.64-2.826  | 0.436 | Braun(2020)PD1_CCR<br>CC        |



|                              |       |              |       |                                  |
|------------------------------|-------|--------------|-------|----------------------------------|
| WTAP+B-C2                    | 0.969 | 0.464-2.026  | 0.934 | Braun(2020)PD1_CCR<br>CC         |
| NoneMethy+B-C4               | 1.029 | 0.492-2.149  | 0.94  | Braun(2020)PD1_CCR<br>CC         |
| Fibroblast                   | 0.545 | 0.155-1.916  | 0.344 | Gide(2019)PD1_Mela<br>noma       |
| Macrophage                   | 0.545 | 0.155-1.916  | 0.344 | Gide(2019)PD1_Mela<br>noma       |
| Regulatory T cells           | 0.545 | 0.155-1.916  | 0.344 | Gide(2019)PD1_Mela<br>noma       |
| CD8+ T cells                 | 1.222 | 0.353-4.236  | 0.752 | Gide(2019)PD1_Mela<br>noma       |
| B cells                      | 0.818 | 0.236-2.834  | 0.752 | Gide(2019)PD1_Mela<br>noma       |
| WTAP+mac-C1                  | 0.545 | 0.155-1.916  | 0.344 | Gide(2019)PD1_Mela<br>noma       |
| HNRNPA2B1+mac-C3             | 0.818 | 0.236-2.834  | 0.752 | Gide(2019)PD1_Mela<br>noma       |
| YTHDC1<br>&YTHDF3+mac_C4     | 1.833 | 0.522-6.439  | 0.344 | Gide(2019)PD1_Mela<br>noma       |
| HNRNPA2B1+CAF-C1             | 0.545 | 0.155-1.916  | 0.344 | Gide(2019)PD1_Mela<br>noma       |
| WTAP+CAF-C2                  | 0.545 | 0.155-1.916  | 0.344 | Gide(2019)PD1_Mela<br>noma       |
| HNRNPC+CAF-C3                | 0.359 | 0.1-1.293    | 0.117 | Gide(2019)PD1_Mela<br>noma       |
| NoneMethy-CAF-C4             | 0.818 | 0.236-2.834  | 0.752 | Gide(2019)PD1_Mela<br>noma       |
| HNRNPA2B1+CD8+ T<br>cells-C1 | 2.786 | 0.773-10.043 | 0.117 | Gide(2019)PD1_Mela<br>noma       |
| ALKBH5+CD8+ T<br>cells-C4    | 0.231 | 0.061-0.87   | 0.03  | Gide(2019)PD1_Mela<br>noma       |
| HNRNPA2B1+Reg T<br>cells-C1  | 1.222 | 0.353-4.236  | 0.752 | Gide(2019)PD1_Mela<br>noma       |
| YTHDF2+Reg T cells-<br>C4    | 0.818 | 0.236-2.834  | 0.752 | Gide(2019)PD1_Mela<br>noma       |
| HNRNPA2B1+B-C1               | 0.545 | 0.155-1.916  | 0.344 | Gide(2019)PD1_Mela<br>noma       |
| WTAP+B-C2                    | 0.545 | 0.155-1.916  | 0.344 | Gide(2019)PD1_Mela<br>noma       |
| NoneMethy+B-C4               | 0.429 | 0.096-1.924  | 0.269 | Gide(2019)PD1+CTLA<br>4_Melanoma |
| Macrophage                   | 0.111 | 0.019-0.66   | 0.016 | Gide(2019)PD1+CTLA<br>4_Melanoma |
| Regulatory T cells           | 0.231 | 0.047-1.136  | 0.071 | Gide(2019)PD1+CTLA<br>4_Melanoma |
| CD8+ T cells                 | 0.231 | 0.047-1.136  | 0.071 | Gide(2019)PD1+CTLA<br>4_Melanoma |
| B cells                      | 0.429 | 0.096-1.924  | 0.269 | Gide(2019)PD1+CTLA<br>4_Melanoma |
| WTAP+mac-C1                  | 0.04  | 0.004-0.385  | 0.005 | Gide(2019)PD1+CTLA<br>4_Melanoma |
| HNRNPA2B1+mac-C3             | 0.231 | 0.047-1.136  | 0.071 | Gide(2019)PD1+CTLA<br>4_Melanoma |
| YTHDC1<br>&YTHDF3+mac_C4     | 1.32  | 0.305-5.709  | 0.71  | Gide(2019)PD1+CTLA<br>4_Melanoma |
| HNRNPA2B1+CAF-C1             | 0.231 | 0.047-1.136  | 0.071 | Gide(2019)PD1+CTLA<br>4_Melanoma |

|                           |       |             |       |                              |
|---------------------------|-------|-------------|-------|------------------------------|
| WTAP+CAF-C2               | 0.04  | 0.004-0.385 | 0.005 | Gide(2019)PD1+CTLA4_Melanoma |
| HNRNPC+CAF-C3             | 2.333 | 0.52-10.468 | 0.269 | Gide(2019)PD1+CTLA4_Melanoma |
| NoneMethy-CAF-C4          | 4.333 | 0.88-21.316 | 0.071 | Gide(2019)PD1+CTLA4_Melanoma |
| HNRNPA2B1+CD8+ T cells-C1 | 0.231 | 0.047-1.136 | 0.071 | Gide(2019)PD1+CTLA4_Melanoma |
| ALKBH5+CD8+ T cells-C4    | 0.758 | 0.175-3.274 | 0.71  | Gide(2019)PD1+CTLA4_Melanoma |
| HNRNPA2B1+Reg T cells-C1  | 0.758 | 0.175-3.274 | 0.71  | Gide(2019)PD1+CTLA4_Melanoma |
| YTHDF2+Reg T cells-C4     | 1.32  | 0.305-5.709 | 0.71  | Gide(2019)PD1+CTLA4_Melanoma |
| HNRNPA2B1+B-C1            | 0.758 | 0.175-3.274 | 0.71  | Gide(2019)PD1+CTLA4_Melanoma |
| WTAP+B-C2                 | 0.758 | 0.175-3.274 | 0.71  | Gide(2019)PD1+CTLA4_Melanoma |
| NoneMethy+B-C4            | 0.758 | 0.175-3.274 | 0.71  | Gide(2019)PD1+CTLA4_Melanoma |
| Fibroblast                | 1.322 | 0.444-3.938 | 0.616 | Rose(2021)ICB_Bladder_Cancer |
| Macrophage                | 0.521 | 0.171-1.589 | 0.252 | Rose(2021)ICB_Bladder_Cancer |
| Regulatory T cells        | 0.715 | 0.24-2.129  | 0.547 | Rose(2021)ICB_Bladder_Cancer |
| CD8+ T cells              | 0.521 | 0.171-1.589 | 0.252 | Rose(2021)ICB_Bladder_Cancer |
| B cells                   | 0.715 | 0.24-2.129  | 0.547 | Rose(2021)ICB_Bladder_Cancer |
| WTAP+mac-C1               | 0.972 | 0.329-2.875 | 0.959 | Rose(2021)ICB_Bladder_Cancer |
| HNRNPA2B1+mac-C3          | 0.521 | 0.171-1.589 | 0.252 | Rose(2021)ICB_Bladder_Cancer |
| YTHDC1 & YTHDF3+mac_C4    | 0.521 | 0.171-1.589 | 0.252 | Rose(2021)ICB_Bladder_Cancer |
| HNRNPA2B1+CAF-C1          | 1.322 | 0.444-3.938 | 0.616 | Rose(2021)ICB_Bladder_Cancer |
| WTAP+CAF-C2               | 1.814 | 0.596-5.519 | 0.295 | Rose(2021)ICB_Bladder_Cancer |
| HNRNPC+CAF-C3             | 0.756 | 0.254-2.254 | 0.616 | Rose(2021)ICB_Bladder_Cancer |
| NoneMethy-CAF-C4          | 1.399 | 0.47-4.169  | 0.547 | Rose(2021)ICB_Bladder_Cancer |
| HNRNPA2B1+CD8+ T cells-C1 | 0.373 | 0.117-1.186 | 0.094 | Rose(2021)ICB_Bladder_Cancer |
| ALKBH5+CD8+ T cells-C4    | 1.322 | 0.444-3.938 | 0.616 | Rose(2021)ICB_Bladder_Cancer |
| HNRNPA2B1+Reg T cells-C1  | 0.373 | 0.117-1.186 | 0.094 | Rose(2021)ICB_Bladder_Cancer |
| YTHDF2+Reg T cells-C4     | 0.715 | 0.24-2.129  | 0.547 | Rose(2021)ICB_Bladder_Cancer |
| HNRNPA2B1+B-C1            | 0.715 | 0.24-2.129  | 0.547 | Rose(2021)ICB_Bladder_Cancer |
| WTAP+B-C2                 | 1.814 | 0.596-5.519 | 0.295 | Rose(2021)ICB_Bladder_Cancer |
| NoneMethy+B-C4            | 1.322 | 0.444-3.938 | 0.616 | Rose(2021)ICB_Bladder_Cancer |

|                           |       |              |       |                            |
|---------------------------|-------|--------------|-------|----------------------------|
| Fibroblast                | 7.692 | 1.445-40.931 | 0.017 | Hugo(2016)PD1_Met_Melanoma |
| Macrophage                | 0.217 | 0.049-0.954  | 0.043 | Hugo(2016)PD1_Met_Melanoma |
| Regulatory T cells        | 0.368 | 0.092-1.469  | 0.158 | Hugo(2016)PD1_Met_Melanoma |
| CD8+ T cells              | 0.217 | 0.049-0.954  | 0.043 | Hugo(2016)PD1_Met_Melanoma |
| B cells                   | 4.071 | 0.929-17.847 | 0.063 | Hugo(2016)PD1_Met_Melanoma |
| WTAP+mac-C1               | 0.217 | 0.049-0.954  | 0.043 | Hugo(2016)PD1_Met_Melanoma |
| HNRNPA2B1+mac-C3          | 0.368 | 0.092-1.469  | 0.158 | Hugo(2016)PD1_Met_Melanoma |
| YTHDC1 &YTHDF3+mac_C4     | 1.487 | 0.392-5.651  | 0.56  | Hugo(2016)PD1_Met_Melanoma |
| HNRNPA2B1+CAF-C1          | 0.368 | 0.092-1.469  | 0.158 | Hugo(2016)PD1_Met_Melanoma |
| WTAP+CAF-C2               | 0.368 | 0.092-1.469  | 0.158 | Hugo(2016)PD1_Met_Melanoma |
| HNRNPC+CAF-C3             | 1.487 | 0.392-5.651  | 0.56  | Hugo(2016)PD1_Met_Melanoma |
| NoneMethy-CAF-C4          | 0.217 | 0.049-0.954  | 0.043 | Hugo(2016)PD1_Met_Melanoma |
| HNRNPA2B1+CD8+ T cells-C1 | 0.114 | 0.021-0.611  | 0.011 | Hugo(2016)PD1_Met_Melanoma |
| ALKBH5+CD8+ T cells-C4    | 0.595 | 0.156-2.265  | 0.447 | Hugo(2016)PD1_Met_Melanoma |
| HNRNPA2B1+Reg T cells-C1  | 0.595 | 0.156-2.265  | 0.447 | Hugo(2016)PD1_Met_Melanoma |
| YTHDF2+Reg T cells-C4     | 0.368 | 0.092-1.469  | 0.158 | Hugo(2016)PD1_Met_Melanoma |
| HNRNPA2B1+B-C1            | 0.595 | 0.156-2.265  | 0.447 | Hugo(2016)PD1_Met_Melanoma |
| WTAP+B-C2                 | 0.595 | 0.156-2.265  | 0.447 | Hugo(2016)PD1_Met_Melanoma |
| NoneMethy+B-C4            | 0.368 | 0.092-1.469  | 0.158 | Hugo(2016)PD1_Met_Melanoma |
| Fibroblast                | 0.875 | 0.176-4.338  | 0.87  | Lauss(2017)ACT_Melanoma    |
| Macrophage                | 0.214 | 0.038-1.205  | 0.08  | Lauss(2017)ACT_Melanoma    |
| Regulatory T cells        | 0.214 | 0.038-1.205  | 0.08  | Lauss(2017)ACT_Melanoma    |
| CD8+ T cells              | 0.214 | 0.038-1.205  | 0.08  | Lauss(2017)ACT_Melanoma    |
| B cells                   | 0.444 | 0.087-2.274  | 0.33  | Lauss(2017)ACT_Melanoma    |
| WTAP+mac-C1               | 0.444 | 0.087-2.274  | 0.33  | Lauss(2017)ACT_Melanoma    |
| HNRNPA2B1+mac-C3          | 0.214 | 0.038-1.205  | 0.08  | Lauss(2017)ACT_Melanoma    |
| YTHDC1 &YTHDF3+mac_C4     | 0.875 | 0.176-4.338  | 0.87  | Lauss(2017)ACT_Melanoma    |
| HNRNPA2B1+CAF-C1          | 1.714 | 0.339-8.67   | 0.515 | Lauss(2017)ACT_Melanoma    |
| WTAP+CAF-C2               | 0.875 | 0.176-4.338  | 0.87  | Lauss(2017)ACT_Melanoma    |

|                           |       |              |       |                         |
|---------------------------|-------|--------------|-------|-------------------------|
| HNRNPC+CAF-C3             | 1.714 | 0.339-8.67   | 0.515 | Lauss(2017)ACT_Melanoma |
| NoneMethy-CAF-C4          | 0.875 | 0.176-4.338  | 0.87  | Lauss(2017)ACT_Melanoma |
| HNRNPA2B1+CD8+ T cells-C1 | 1.714 | 0.339-8.67   | 0.515 | Lauss(2017)ACT_Melanoma |
| ALKBH5+CD8+ T cells-C4    | 1.714 | 0.339-8.67   | 0.515 | Lauss(2017)ACT_Melanoma |
| HNRNPA2B1+Reg T cells-C1  | 3.5   | 0.639-19.188 | 0.149 | Lauss(2017)ACT_Melanoma |
| YTHDF2+Reg T cells-C4     | 3.5   | 0.639-19.188 | 0.149 | Lauss(2017)ACT_Melanoma |
| HNRNPA2B1+B-C1            | 8     | 1.213-52.695 | 0.031 | Lauss(2017)ACT_Melanoma |
| WTAP+B-C2                 | 0.214 | 0.038-1.205  | 0.08  | Lauss(2017)ACT_Melanoma |
| NoneMethy+B-C4            | 0.444 | 0.087-2.274  | 0.33  | Lauss(2017)ACT_Melanoma |
| Fibroblast                | 0.832 | 0.399-1.74   | 0.625 | Liu(2019)PD1_Melanoma   |
| Macrophage                | 0.907 | 0.435-1.891  | 0.794 | Liu(2019)PD1_Melanoma   |
| Regulatory T cells        | 0.683 | 0.326-1.43   | 0.312 | Liu(2019)PD1_Melanoma   |
| CD8+ T cells              | 0.627 | 0.299-1.315  | 0.217 | Liu(2019)PD1_Melanoma   |
| B cells                   | 0.787 | 0.377-1.645  | 0.525 | Liu(2019)PD1_Melanoma   |
| WTAP+mac-C1               | 0.787 | 0.377-1.645  | 0.525 | Liu(2019)PD1_Melanoma   |
| HNRNPA2B1+mac-C3          | 0.513 | 0.243-1.083  | 0.08  | Liu(2019)PD1_Melanoma   |
| YTHDC1 & YTHDF3+mac_C4    | 1.201 | 0.575-2.509  | 0.625 | Liu(2019)PD1_Melanoma   |
| HNRNPA2B1+CAF-C1          | 0.958 | 0.459-1.998  | 0.91  | Liu(2019)PD1_Melanoma   |
| WTAP+CAF-C2               | 1.201 | 0.575-2.509  | 0.625 | Liu(2019)PD1_Melanoma   |
| HNRNPC+CAF-C3             | 0.907 | 0.435-1.891  | 0.794 | Liu(2019)PD1_Melanoma   |
| NoneMethy-CAF-C4          | 0.683 | 0.326-1.43   | 0.312 | Liu(2019)PD1_Melanoma   |
| HNRNPA2B1+CD8+ T cells-C1 | 0.723 | 0.345-1.513  | 0.388 | Liu(2019)PD1_Melanoma   |
| ALKBH5+CD8+ T cells-C4    | 0.646 | 0.309-1.352  | 0.247 | Liu(2019)PD1_Melanoma   |
| HNRNPA2B1+Reg T cells-C1  | 0.683 | 0.326-1.43   | 0.312 | Liu(2019)PD1_Melanoma   |
| YTHDF2+Reg T cells-C4     | 1.201 | 0.575-2.509  | 0.625 | Liu(2019)PD1_Melanoma   |
| HNRNPA2B1+B-C1            | 0.907 | 0.435-1.891  | 0.794 | Liu(2019)PD1_Melanoma   |
| WTAP+B-C2                 | 1.949 | 0.923-4.111  | 0.08  | Liu(2019)PD1_Melanoma   |
| NoneMethy+B-C4            | 0.593 | 0.282-1.246  | 0.167 | Liu(2019)PD1_Melanoma   |
| Fibroblast                | 0.278 | 0.025-3.107  | 0.298 | Riaz(2017)PD1_Melanoma  |

|                           |       |              |       |                                  |
|---------------------------|-------|--------------|-------|----------------------------------|
| Macrophage                | 0     | 0-Inf        | 0.995 | Riaz(2017)PD1_Melanoma           |
| Regulatory T cells        | 0.278 | 0.025-3.107  | 0.298 | Riaz(2017)PD1_Melanoma           |
| CD8+ T cells              | 0     | 0-Inf        | 0.995 | Riaz(2017)PD1_Melanoma           |
| B cells                   | 0     | 0-Inf        | 0.995 | Riaz(2017)PD1_Melanoma           |
| WTAP+mac-C1               | 0     | 0-Inf        | 0.995 | Riaz(2017)PD1_Melanoma           |
| HNRNPA2B1+mac-C3          | 0.278 | 0.025-3.107  | 0.298 | Riaz(2017)PD1_Melanoma           |
| YTHDC1 &YTHDF3+mac_C4     | 1     | 0.119-8.419  | 1     | Riaz(2017)PD1_Melanoma           |
| HNRNPA2B1+CAF-C1          | 1     | 0.119-8.419  | 1     | Riaz(2017)PD1_Melanoma           |
| WTAP+CAF-C2               | 0     | 0-Inf        | 0.995 | Riaz(2017)PD1_Melanoma           |
| HNRNPC+CAF-C3             | 0.278 | 0.025-3.107  | 0.298 | Riaz(2017)PD1_Melanoma           |
| NoneMethy-CAF-C4          | 3.6   | 0.322-40.275 | 0.298 | Riaz(2017)PD1_Melanoma           |
| HNRNPA2B1+CD8+ T cells-C1 | 0.278 | 0.025-3.107  | 0.298 | Riaz(2017)PD1_Melanoma           |
| ALKBH5+CD8+ T cells-C4    | 1     | 0.119-8.419  | 1     | Riaz(2017)PD1_Melanoma           |
| HNRNPA2B1+Reg T cells-C1  | 0     | 0-Inf        | 0.995 | Riaz(2017)PD1_Melanoma           |
| YTHDF2+Reg T cells-C4     | 0     | 0-Inf        | 0.995 | Riaz(2017)PD1_Melanoma           |
| HNRNPA2B1+B-C1            | 1     | 0.119-8.419  | 1     | Riaz(2017)PD1_Melanoma           |
| WTAP+B-C2                 | 0.278 | 0.025-3.107  | 0.298 | Riaz(2017)PD1_Melanoma           |
| NoneMethy+B-C4            | 0     | 0-Inf        | 0.995 | Riaz(2017)PD1_Melanoma           |
| Fibroblast                | 1.333 | 0.259-6.879  | 0.731 | VanAllen(2016)CTLA4_Met_Melanoma |
| Macrophage                | 0.75  | 0.145-3.867  | 0.731 | VanAllen(2016)CTLA4_Met_Melanoma |
| Regulatory T cells        | 1.333 | 0.259-6.879  | 0.731 | VanAllen(2016)CTLA4_Met_Melanoma |
| CD8+ T cells              | 0.667 | 0.129-3.44   | 0.628 | VanAllen(2016)CTLA4_Met_Melanoma |
| B cells                   | 0.667 | 0.129-3.44   | 0.628 | VanAllen(2016)CTLA4_Met_Melanoma |
| WTAP+mac-C1               | 0.75  | 0.145-3.867  | 0.731 | VanAllen(2016)CTLA4_Met_Melanoma |
| HNRNPA2B1+mac-C3          | 0.667 | 0.129-3.44   | 0.628 | VanAllen(2016)CTLA4_Met_Melanoma |
| YTHDC1 &YTHDF3+mac_C4     | 1.5   | 0.291-7.733  | 0.628 | VanAllen(2016)CTLA4_Met_Melanoma |
| HNRNPA2B1+CAF-C1          | 0.667 | 0.129-3.44   | 0.628 | VanAllen(2016)CTLA4_Met_Melanoma |
| WTAP+CAF-C2               | 1.333 | 0.259-6.879  | 0.731 | VanAllen(2016)CTLA4_Met_Melanoma |
| HNRNPC+CAF-C3             | 1.333 | 0.259-6.879  | 0.731 | VanAllen(2016)CTLA4_Met_Melanoma |

|                              |       |              |       |                                      |
|------------------------------|-------|--------------|-------|--------------------------------------|
| NoneMethy-CAF-C4             | 1.5   | 0.291-7.733  | 0.628 | VanAllen(2016)CTLA4<br>_Met_Melanoma |
| HNRNPA2B1+CD8+ T<br>cells-C1 | 0.667 | 0.129-3.44   | 0.628 | VanAllen(2016)CTLA4<br>_Met_Melanoma |
| ALKBH5+CD8+ T<br>cells-C4    | 0.75  | 0.145-3.867  | 0.731 | VanAllen(2016)CTLA4<br>_Met_Melanoma |
| HNRNPA2B1+Reg T<br>cells-C1  | 1.5   | 0.291-7.733  | 0.628 | VanAllen(2016)CTLA4<br>_Met_Melanoma |
| YTHDF2+Reg T cells-<br>C4    | 0.356 | 0.06-2.091   | 0.253 | VanAllen(2016)CTLA4<br>_Met_Melanoma |
| HNRNPA2B1+B-C1               | 0.667 | 0.129-3.44   | 0.628 | VanAllen(2016)CTLA4<br>_Met_Melanoma |
| WTAP+B-C2                    | 0.667 | 0.129-3.44   | 0.628 | VanAllen(2016)CTLA4<br>_Met_Melanoma |
| NoneMethy+B-C4               | 1.5   | 0.291-7.733  | 0.628 | VanAllen(2016)CTLA4<br>_Met_Melanoma |
| Fibroblast                   | 1     | 0.104-9.62   | 1     | JaeWon(2020)PD1_N<br>SCLC            |
| Macrophage                   | 0     | 0-Inf        | 0.996 | JaeWon(2020)PD1_N<br>SCLC            |
| Regulatory T cells           | 0     | 0-Inf        | 0.996 | JaeWon(2020)PD1_N<br>SCLC            |
| CD8+ T cells                 | 0     | 0-Inf        | 0.996 | JaeWon(2020)PD1_N<br>SCLC            |
| B cells                      | 0     | 0-Inf        | 0.996 | JaeWon(2020)PD1_N<br>SCLC            |
| WTAP+mac-C1                  | 0.238 | 0.019-3.014  | 0.268 | JaeWon(2020)PD1_N<br>SCLC            |
| HNRNPA2B1+mac-C3             | 0     | 0-Inf        | 0.996 | JaeWon(2020)PD1_N<br>SCLC            |
| YTHDC1<br>&YTHDF3+mac_C4     | 0     | 0-Inf        | 0.996 | JaeWon(2020)PD1_N<br>SCLC            |
| HNRNPA2B1+CAF-C1             | 0     | 0-Inf        | 0.996 | JaeWon(2020)PD1_N<br>SCLC            |
| WTAP+CAF-C2                  | 0.238 | 0.019-3.014  | 0.268 | JaeWon(2020)PD1_N<br>SCLC            |
| HNRNPC+CAF-C3                | 0     | 0-Inf        | 0.996 | JaeWon(2020)PD1_N<br>SCLC            |
| NoneMethy-CAF-C4             | 1     | 0.104-9.62   | 1     | JaeWon(2020)PD1_N<br>SCLC            |
| HNRNPA2B1+CD8+ T<br>cells-C1 | 0.238 | 0.019-3.014  | 0.268 | JaeWon(2020)PD1_N<br>SCLC            |
| ALKBH5+CD8+ T<br>cells-C4    | 0     | 0-Inf        | 0.996 | JaeWon(2020)PD1_N<br>SCLC            |
| HNRNPA2B1+Reg T<br>cells-C1  | 0     | 0-Inf        | 0.996 | JaeWon(2020)PD1_N<br>SCLC            |
| YTHDF2+Reg T cells-<br>C4    | 1     | 0.104-9.62   | 1     | JaeWon(2020)PD1_N<br>SCLC            |
| HNRNPA2B1+B-C1               | 1     | 0.104-9.62   | 1     | JaeWon(2020)PD1_N<br>SCLC            |
| WTAP+B-C2                    | 1     | 0.104-9.62   | 1     | JaeWon(2020)PD1_N<br>SCLC            |
| NoneMethy+B-C4               | 1     | 0.104-9.62   | 1     | JaeWon(2020)PD1_N<br>SCLC            |
| Fibroblast                   | 2.143 | 0.377-12.189 | 0.39  | Nathanson(2017)CTL<br>A4_Melanoma    |
| Macrophage                   | 0.467 | 0.082-2.655  | 0.39  | Nathanson(2017)CTL<br>A4_Melanoma    |

|                              |       |              |       |                                   |
|------------------------------|-------|--------------|-------|-----------------------------------|
| Regulatory T cells           | 0.467 | 0.082-2.655  | 0.39  | Nathanson(2017)CTL<br>A4_Melanoma |
| CD8+ T cells                 | 0.467 | 0.082-2.655  | 0.39  | Nathanson(2017)CTL<br>A4_Melanoma |
| B cells                      | 0.467 | 0.082-2.655  | 0.39  | Nathanson(2017)CTL<br>A4_Melanoma |
| WTAP+mac-C1                  | 0.467 | 0.082-2.655  | 0.39  | Nathanson(2017)CTL<br>A4_Melanoma |
| HNRNPA2B1+mac-C3             | 0.467 | 0.082-2.655  | 0.39  | Nathanson(2017)CTL<br>A4_Melanoma |
| YTHDC1<br>&YTHDF3+mac_C4     | 1     | 0.183-5.46   | 1     | Nathanson(2017)CTL<br>A4_Melanoma |
| HNRNPA2B1+CAF-C1             | 2.143 | 0.377-12.189 | 0.39  | Nathanson(2017)CTL<br>A4_Melanoma |
| WTAP+CAF-C2                  | 1     | 0.183-5.46   | 1     | Nathanson(2017)CTL<br>A4_Melanoma |
| HNRNPC+CAF-C3                | 1     | 0.183-5.46   | 1     | Nathanson(2017)CTL<br>A4_Melanoma |
| NoneMethy-CAF-C4             | 1     | 0.183-5.46   | 1     | Nathanson(2017)CTL<br>A4_Melanoma |
| HNRNPA2B1+CD8+ T<br>cells-C1 | 0.467 | 0.082-2.655  | 0.39  | Nathanson(2017)CTL<br>A4_Melanoma |
| ALKBH5+CD8+ T<br>cells-C4    | 2.143 | 0.377-12.189 | 0.39  | Nathanson(2017)CTL<br>A4_Melanoma |
| HNRNPA2B1+Reg T<br>cells-C1  | 1     | 0.183-5.46   | 1     | Nathanson(2017)CTL<br>A4_Melanoma |
| YTHDF2+Reg T cells-<br>C4    | 5     | 0.752-33.194 | 0.096 | Nathanson(2017)CTL<br>A4_Melanoma |
| HNRNPA2B1+B-C1               | 1     | 0.183-5.46   | 1     | Nathanson(2017)CTL<br>A4_Melanoma |
| WTAP+B-C2                    | 2.143 | 0.377-12.189 | 0.39  | Nathanson(2017)CTL<br>A4_Melanoma |
| NoneMethy+B-C4               | 2.143 | 0.377-12.189 | 0.39  | Nathanson(2017)CTL<br>A4_Melanoma |
